# Supplementary material for: Citizen science data on rodent indoor movement provide early warning of zoonotic risk
Source: Research Square preprint supplement (doi:10.21203/rs.3.rs-8284763/v1), 2026-01-22
Supplement: Supplementary file 2 [file 330131e237f62db74b54f1e5.docx]

**Supplementary Table 3**

Results from multiple linear regressions on the number of reports of indoor observations of a) voles in the four northernmost counties in Sweden as a function of monthly winter (December-March) weather data at the weather station at Svartberget (northern Sweden) and b) small mammals in southern Sweden as a function of monthly winter (December-March) weather data at the weather station Ljungby (southern Sweden).

| Variable | Estimate | Standard error | t-value | P-value |
| --- | --- | --- | --- | --- |
| A – Northern Sweden – Voles in the four northernmost counties | | | | |
| Intercept | 1.040 | 0.607 | 1.713 | 0.106 |
| Number of rainy days | 1.763 | 0.600 | 2.940 | 0.010 |
| Mean temperature (°C) | 0.032 | 0.075 | 0.430 | 0.673 |
| Rain (mm) | -0.332 | 0.123 | -2.689 | 0.016 |
| B – Southern Sweden – All small mammals | | | | |
| Intercept | 4.489 | 0.692 | 6.492 | 0.000 |
| Number of rainy days | -0.069 | 0.168913 | -0.406 | 0.690 |
| Mean temperature (°C) | -0.038 | 0.184209 | -0.206 | 0.839 |
| Rain (mm) | -0.002 | 0.024107 | -0.071 | 0.944 |
| C – Northern Sweden – All small mammals in the county of Västerbotten | | | | |
| Intercept | 1.453 | 0.904 | 1.607 | 0.128 |
| Number of rainy days | 1.043 | 0.893 | 1.168 | 0.260 |
| Mean temperature (°C) | -0.050 | 0.112 | -0.444 | 0.663 |
| Rain (mm) | -0.109 | 0.184 | -0.590 | 0.563 |
