# Supplementary material for: Citizen science data on rodent indoor movement provide early warning of zoonotic risk
Source: Research Square preprint supplement (doi:10.21203/rs.3.rs-8284763/v1), 2026-01-22
Supplement: Supplementary file 3 [file 5a688036d5d9d99bf1dce9b3.xlsx]

## Sheet: ReadMe
Supplementary Information Table 2. Indoor observations reported by the public in September 2020-April 2025 along with the trapping index of rodents in various regions of Sweden as part of the National Environmental Monitoring Program of Small Rodents, incidence of hemorrhagic fever with renal syndrome (HFRS), tick-borne encephalitis (TBE) and tularemia, and weather conditions at the two monitorin…

## Sheet: Tot
TimeStep	Year	Month	Count_Month	North_Count	South_Count	North_Mus	North_Sork	South_Mus	South_Sork	All_Spec_4N	All_SpecAC	Reports_Sork_AC	Reports_Sork_4N	TI_MG_Vindeln	TI_MG_Kust	TI_Apod_Kust	TI_MG_Grimso	TI_Apod_Grimso	TI_MG_Skane	TI_Apod_Skane	NE_INC_AC	NE_Number_North	NE_INC_North	NE_Number_4N	NE_INC_4N	Harpest_Inc_SE	Harpest_Inc_AC	TBE_Inc_SE	TBE_Inc_Skane	TBE_Inc_Vastmanland	NbRainyDays_Svartb	NbSnowy_Days_Svartb	Temp_Mean_Svartb	Prec_mm_Svartb	Prec_mm_Rain_Svartb	Prec_mm_Snow_Svartb	NBRainyDaysLjungby	NBSnowyDaysLjungy	Temp_Mean_Ljungy	Prec_mm_Ljungby	Prec_mm_Rain_Ljungby	Prec_mm_Snow_Ljungby
1	2020	1																			1.1	7	0.398502	7	0.779063	0.06	0	0.01	0	0.36	0	26	-3.04194	64.6	0	64.2	14	1	3.75806	85.9	79.4	0.8
2	2020	2																			0	4	0.227715	4	0.445179	0.06	0	0	0	0	3	26	-5.71724	59.6	20.6	39	17	5	2.25172	170.8	159.3	9.3
3	2020	3																			0	2	0.113858	1	0.111295	0.02	0	0	0	0	1	25	-2.74516	22.1	2.1	20	14	4	2.55161	67.1	66	0
4	2020	4															1.65785	0.0352734	3.42029	6.92754	0	2	0.113858	0	0	0.03	0.37	0.01	0	0.36	3	11	1.23333	22.3	6.6	14.4	4	0	6.87	20.7	18.9	0
5	2020	5												0.0609385	0.313725	0					0.37	5	0.284644	2	0.222589	0.01	0	0.09	0	0.36	5	0	5.36774	22.7	20.5	0	10	0	9.15484	36.6	33.9	0
6	2020	6																			0.37	3	0.170787	2	0.222589	0.04	0	0.2	0.14	0	5	0	16.3	32.9	32.3	0	10	0	16.39	69.7	68.3	0
7	2020	7																			0	1	0.0569289	1	0.111295	0.17	0	0.37	0.07	1.08	16	0	12.6935	111.5	108.3	0	16	0	14.1581	106.8	104.3	0
8	2020	8																			0.37	7	0.398502	6	0.667768	0.59	1.46	0.73	0.36	1.44	4	0	13.5323	25.1	23.4	0	10	0	16.5935	105	103.5	0
9	2020	9	34	16	18	15	0	18	0					1.24413	1.71352	0					0	0	0	0	0	0.99	2.2	0.5	0	1.8	12	0	8.64333	89.4	86.8	0	7	0	12.38	38.7	35.6	0
10	2020	10	134	45	89	42	1	88	0								9.1358	1.5873	5.52778	4.52778	0	1	0.0569289	1	0.111295	0.33	0.73	0.41	0.07	1.08	11	9	3.64194	149.6	104.1	44.4	17	0	8.47419	101.5	98.3	0
11	2020	11	1313	419	894	370	13	841	21	191	115	7	11								0.37	7	0.398502	7	0.779063	0.21	0	0.27	0.14	0.72	10	12	0.55	106.4	83.7	20.8	15	5	6.18	46.7	44.4	0.3
12	2020	12	511	159	352	142	6	312	28	99	81	1	1								1.83	10	0.569289	9	1.00165	0.08	0.37	0.05	0	0	4	25	-1.3871	89	20.6	68.2	14	2	2.9	67.9	63.3	3.5
13	2021	1	260	79	181	55	7	166	10	38	28	0	0								2.19	15	0.852344	12	1.33259	0.07	0	0.03	0	0.36	0	31	-11.4355	87.9	0	87.9	6	21	-1.58065	56.5	38.8	17.4
14	2021	2	206	57	149	33	9	130	8	20	10	1	1								0.36	9	0.511406	7	0.777343	0.07	0	0	0	0	0	26	-8.89643	40.2	0	40.2	0	18	-2.80357	10	0	9.8
15	2021	3	137	42	95	26	10	82	8	17	12	0	0								0.73	7	0.39776	5	0.555245	0.04	0	0.01	0	0	0	19	-2.06774	14	0	12.1	8	6	2.54839	30.7	27	0.6
16	2021	4	46	17	29	9	8	29	0	6	4	0	1				2.15168	0.0352734	0.75	0.916667	0.73	8	0.454583	5	0.555245	0.03	0	0.01	0	0.36	1	9	1.31667	27.4	1.5	25.3	4	0	4.66333	29.2	26.6	0
17	2021	5	20	5	15	3	2	15	0	3	3	0	0	1.19565	0.862745	0.313725					1.46	19	1.07964	14	1.55469	0.01	0	0.06	0	0	6	0	6.50968	36	34.2	0	17	0	10.0032	157.9	155.9	0
18	2021	6	12	5	7	5	0	5	0	1	1	0	0								0.36	6	0.340938	5	0.555245	0.04	0	0.47	0	0.36	9	0	14.2933	81.8	79.5	0	4	0	17.0667	24.4	23.2	0
19	2021	7	9	1	8	0	1	8	0	1	0	0	1								1.46	11	0.625052	9	0.999441	0.44	0.36	0.9	0.21	1.79	5	0	17.6742	69.2	66.9	0	12	0	18.3387	115.2	114.1	0
20	2021	8	15	3	12	3	0	9	2	2	0	0	0								3.28	15	0.852344	15	1.66574	0.8	2.91	0.88	0.14	1.43	14	0	12.1839	121.6	119	0	16	0	14.4613	93.7	92.9	0
21	2021	9	39	19	20	14	5	17	1	11	10	4	4	10	10.904	0.960452					2.55	18	1.02281	15	1.66574	0.71	2.91	1.34	0.57	2.51	11	0	6.99333	73.6	71.1	0	9	0	12.1567	95.6	93.8	0
22	2021	10	170	130	40	108	21	39	1	117	103	21	21				5.71429	0.21164	2.69444	4.19444	1.46	14	0.795521	13	1.44364	0.59	3.64	1.02	0.36	2.87	13	9	3.12903	138	103	33	9	0	8.06129	95.2	90.2	0
23	2021	11	239	156	83	103	49	77	3	140	125	44	45								2.55	29	1.64786	29	3.22042	0.33	1.46	0.31	0	0.36	5	24	-4.06	50.5	20.8	29.7	10	3	4.34333	54.3	45.2	5.1
24	2021	12	128	84	44	44	18	35	6	67	25	11	13								16.39	77	4.37537	68	7.55134	0.12	1.09	0.08	0.07	0	1	30	-9.57742	24.6	1.7	22.9	2	22	-2.23871	35.9	3.5	31.3
25	2022	1	74	29	45	13	7	34	10	23	6	2	6								8.38	56	3.18208	47	5.21931	0.1	0.72	0.02	0	0	1	29	-6.80323	34.8	2.4	32.4	12	11	1.22258	41.6	36.8	3.8
26	2022	2	73	54	19	42	4	10	7	53	44	1	4								8.01	54	3.06844	41	4.55301	0.06	0.36	0.02	0	0	0	28	-7.26071	48.3	0	48.3	11	7	1.46071	102.9	85	15.3
27	2022	3	49	35	14	19	14	8	1	35	24	9	14								10.93	61	3.4662	51	5.6635	0.02	0	0	0	0	1	19	-1.00968	21.6	3.4	18.2	1	5	1.89355	1.2	1.2	0
28	2022	4	21	12	9	5	5	6	0	11	0	2	4				0.493827	0	0.416667	1.08333	7.65	51	2.89797	43	4.77511	0.01	0.36	0.01	0	0	0	13	0.576667	29	0	29	9	3	5.32667	60.3	41.3	18.8
29	2022	5	9	4	5	3	1	5	0	4	0	1	1	2.50447	2.40964	0.0267738					2.55	35	1.9888	26	2.88728	0.04	0.36	0.21	0	0	8	0	7.96129	25	22.6	0	12	0	10.7774	65.4	65.2	0
30	2022	6	7	4	3	0	4	2	0	4	0	0	4								2.9	33	1.87516	29	3.22042	0.02	0.36	0.43	0.07	0.71	9	0	14.4133	86.2	84.4	0	7	0	15.4733	27.6	23.2	0
31	2022	7	13	7	6	0	6	6	0	7	4	0	6								1.45	14	0.795521	13	1.44364	0.2	1.45	0.86	0.21	2.49	10	0	14.5645	106.2	103.4	0	8	0	16.4742	56.5	52.9	0
32	2022	8	11	8	3	3	5	1	1	6	4	0	5								3.26	17	0.96599	16	1.77678	0.59	9.05	1.06	0.35	2.85	8	0	13.9	68.8	67.2	0	6	0	17.1065	60.7	58.9	0
33	2022	9	50	28	22	6	17	14	8	28	9	0	17	6.09053	7.71392	0.306513					2.53	17	0.96599	14	1.55469	0.87	17.73	0.81	0.07	2.49	10	0	7.77333	69.4	68.6	0	10	0	10.98	59	57.5	0
34	2022	10	54	31	23	29	1	21	2	29	18	1	1				2.68078	1.23457	2.38889	5.19444	3.62	15	0.852344	14	1.55469	0.39	5.79	0.63	0.07	0.36	10	2	3.74194	59.4	56.8	0.2	15	0	9.70645	45.1	41.1	0
35	2022	11	70	32	38	32	0	34	4	32	14	0	0								1.81	26	1.4774	16	1.77678	0.22	2.53	0.36	0.07	1.07	6	22	-1.71667	24	16.2	7.6	9	4	5.40333	35.6	23.7	8.5
36	2022	12	74	16	57	13	22	51	5	13	6	0	2								2.9	21	1.19328	21	2.33203	0.1	1.45	0.03	0	0	1	30	-8.43548	66.6	7.5	59.1	10	17	-1.60645	70.8	51	18.1
37	2023	1	52	11	40	8	2	34	4	6	1	0	1								1.08	22	1.2501	19	2.10993	0.04	0	0.01	0	0	1	29	-5.87742	60	3.5	56.5	16	8	1.81935	111.3	104.1	6.8
38	2023	2	13	3	10	2	2	9	4	2	1	0	1								2.15	20	1.13646	16	1.77678	0.05	0.36	0	0	0	0	23	-4.74286	29.8	0	28.6	7	12	0.453571	60.9	46.2	14.1
39	2023	3	12	5	7	4	1	5	2	4	3	0	0								2.53	26	1.4774	23	2.55413	0.03	0.36	0	0	0	0	29	-6.53871	43.6	0	43.6	12	11	1.00968	97.8	77.8	18.9
40	2023	4	6	2	4	1	1	3	1	2	2	1	1				0.496454	0	1.27536	2.26087	1.44	20	1.13646	16	1.77678	0	0	0	0	0	2	11	1.57667	28.6	15.1	12	3	1	5.73333	12.9	9.9	0
41	2023	5	1	0	1	0	0	1	0	0	0	0	0	0.227409	0.132802	0					1.79	16	0.909167	13	1.44364	0.05	0.72	0.12	0	0.71	6	1	8.63226	18.8	18.5	0	2	0	11.2323	20.6	18.8	0
42	2023	6	3	0	3	0	0	1	2	0	0	0	0								0.72	7	0.39776	7	0.777343	0.04	0	0.48	0.14	0.36	4	0	14.3733	35.4	32.8	0	4	0	16.47	59.8	57.4	0
43	2023	7	5	2	3	1	1	2	1	1	0	0	0								0	0	0	0	0	0.11	1.08	0.72	0.49	2.14	16	0	14.5323	83.3	81.4	0	20	0	14.9742	127.9	126.4	0
44	2023	8	5	0	5	0	0	2	3	0	0	0	0								0.36	7	0.39776	7	0.777343	1.44	25.83	1.6	0.28	3.56	19	0	14.5419	155.4	154.2	0	15	0	15.1452	187.4	185.9	0
45	2023	9	2	2	0	8	2	9	0	2	0	0	2	0.246914	0.268817	0.107527					0.36	2	0.113646	1	0.111049	3.09	26.91	1.55	0.35	3.92	11	0	10.6033	47.7	43.7	0	4	0	14.9233	13.6	10.5	0
46	2023	10	23	11	12	9	3	23	3	11	1	0	3				1.65785	0.10582	4.31884	4	0.72	4	0.227292	4	0.444196	1.43	5.38	0.91	0.21	0.71	4	18	-0.706452	37.1	25	9.8	16	0	7.1871	137.9	135.5	0
47	2023	11	41	12	29	5	3	11	6	12	5	1	3								0.36	7	0.39776	7	0.777343	0.35	3.59	0.18	0	0	1	28	-6.81667	75.3	5	70.3	9	8	1.79667	43.4	35.2	5.5
48	2023	12	20	6	14	6	1	22	3	4	2	1	1								1.44	11	0.625052	10	1.11049	0.12	0.36	0.05	0	0.36	0	31	-9.00323	39.1	0	39.1	11	15	0.122581	71.3	50.8	18.5
49	2024	1	30	6	24	0	0	5	1	4	2	0	0								0.36	8	0.454583	6	0.666294	0.08	1.08	0	0	0	0	28	-11.8161	38.1	0	37.7	7	20	-2.82581	62.8	37.8	24.9
50	2024	2	7	0	7	2	0	6	2	0	0	0	0								0.72	8	0.454583	5	0.555245	0.09	1.44	0.01	0	0	0	28	-7.11724	40.5	0	40.5	8	7	1.84828	68	29.1	35.1
51	2024	3	14	5	9	1	3	13	2	5	0	0	3								0.36	1	0.0568229	1	0.111049	0.07	0.72	0	0	0	1	25	-2.84194	47	5.8	40.5	10	4	3.84516	29.4	27.1	0
52	2024	4	19	3	16	1	2	5	3	3	1	0	2				0.967742	0	0.388889	0.805556	0.72	7	0.39776	1	0.111049	0.06	1.44	0.03	0	0.36	5	15	-0.633333	42.4	22.2	19.4	10	3	6.16	57.1	48.7	6.6
53	2024	5	10	3	7	0	2	3	2	3	1	0	2	0.083632	0.0793651	0.0793651					0.72	8	0.454583	5	0.555245	0.04	0.36	0.17	0.07	0.71	3	0	10.7194	11.5	11.2	0	4	0	14.9323	8.8	6.6	0
54	2024	6	6	3	3	1	3	3	0	3	0	0	3								0.36	3	0.170469	3	0.333147	0.07	0	0.44	0.07	1.07	10	0	13.5433	52.4	49.9	0	14	0	14.29	117.4	116.6	0
55	2024	7	4	1	3	0	0	10	0	1	0	0	0								0.36	3	0.170469	3	0.333147	0.21	1.79	0.73	0.07	1.78	18	0	15.6548	136	133	0	11	0	15.8613	91.6	87.6	0
56	2024	8	10	0	10	0	0	15	0	0	0	0	0								0	5	0.284115	4	0.444196	1.21	8.97	0.95	0.35	0	15	0	14.2	122.4	120.3	0	11	0	15.9548	87.9	86.2	0
57	2024	9	17	0	17	0	0	32	2	0	0	0	0	0.648968	0.758808	0.352304					0.36	1	0.0568229	1	0.111049	1.23	8.97	0.66	0.14	1.42	7	0	10.3133	50.2	48.7	0	8	0	13.02	81.6	81.3	0
58	2024	10	32	0	32	12	0	39	0	0	0	0	0				3.52734	0.10582	1.47222	2.88889	0	4	0.227292	4	0.444196	0.66	2.15	0.47	0.14	1.42	10	2	3.55161	89.9	84.5	1.7	6	0	8.66452	50.4	47.2	0
59	2024	11	54	12	42	5	0	19	3	5	1	0	0								0.36	10	0.568229	7	0.777343	0.22	1.08	0.21	0	0.36	2	18	-1.68333	52.3	5.9	45	3	5	3.81333	21.8	15.4	0.8
60	2024	12	29	5	24	3	0	2	5	4	4	0	0								0.36	5	0.284115	5	0.555245	0.17	0.36	0.05	0	0	0	27	-5.81613	49.1	0	47.4	12	6	2.19677	69	65.3	0.2
61	2025	1	254	75	179	53	9	166	6	52	31	6	9								0.36	8	0.454583	6	0.666294	0.04	0	0.01	0	0	0	26	-6.86774	60.5	0	60.4	7	10	0.706452	75.7	54.5	17.1
62	2025	2	932	176	756	132	22	684	24	97	42	7	19								0.36	10	0.568229	6	0.666294	0.03	0	0.01	0	0	1	23	-4.79286	21	2.3	16.9	2	17	-0.725	15.7	8.3	6.3
63	2025	3	246	48	198	32	12	184	7	30	17	5	12								0	2	0.113646	2	0.222098	0.08	1.41	0.01	0	0	3	18	-0.490323	14.2	9.4	4.6	4	4	3.69355	9.5	9.2	0.1
64	2025	4	146	19	127	12	3	107	10	14	11	1	3								0.71	2	0.113646	2	0.222098	0.03	0	0.05	0.07	0	1	1	3.19	10.4	3.4	7	0	0	8.67	1.8	1.8	0

## Sheet: Legend
Variable	Explanation
TimeStep	Time step
Year	Year
Month	Month
Count_Month	Number of records per month
North_Count	Number of records per month in northern Sweden
South_Count	Number of records per month in southern Sweden
North_Mus	Number of mice records per month in northern Sweden
North_Sork	Number of vole records per month in northern Sweden
South_Mus	Number of mice records per month in southern Sweden
South_Sork	Number of vole records per month in southern Sweden
All_Spec_4N	Number of records per month in the four northernmost counties
All_SpecAC	Number of records per month in Västerbotten county
Reports_Sork_AC	Number of vole records per month in Västerbotten county
Reports_Sork_4N	Number of vole records per month in the four northernmost counties
TI_MG_Vindeln	Trapping index of bank voles in the Vindeln area
TI_MG_Kust	Trapping index of bank voles in the coastal area
TI_Apod_Kust	Trapping index of Apodemus spp. in the coastal area
TI_MG_Grimso	Trapping index of bank voles in the Grimsö area
TI_Apod_Grimso	Trapping index of Apodemus spp. in the Grimsö area
TI_MG_Skane	Trapping index of bank voles in Skåne
TI_Apod_Skane	Trapping index of Apodemus spp. in Skåne
NE_INC_AC	NE incidence in the county of Västerbotten
NE_Number_North	NE cases in northern Sweden
NE_INC_North	NE incidence in northern Sweden
NE_Number_4N	NE cases in the four northernmost counties
NE_INC_4N	NE incidence in the four northernmost counties
Harpest_Inc_SE	Tularemia incidence in Sweden
Harpest_Inc_AC	Tularemia incidence in the county of Västerbotten
TBE_Inc_SE	TBE incidence in Sweden
TBE_Inc_Skane	TBE incidence in Skåne
TBE_Inc_Vastmanland	TBE incidence in Västmanland
NbRainyDays_Svartb	Number of rainy days at Svartberget
NbSnowy_Days_Svartb	Number of snowy days at Svartberget
Temp_Mean_Svartb	Mean temperature at Svartberget
Prec_mm_Svartb	Precipitation (mm) at Svartberget
Prec_mm_Rain_Svartb	Precipitation as rain (mm) at Svartberget
Prec_mm_Snow_Svartb	Precipitation as snow(mm) at Svartberget
NBRainyDaysLjungby	Number of rainy days at Ljungby
NBSnowyDaysLjungy	Number of snowy days at Ljungby
Temp_Mean_Ljungy	Mean temperature at Ljungby
Prec_mm_Ljungby	Precipitation (mm) at Ljungby
Prec_mm_Rain_Ljungby	Precipitation as rain (mm) at Ljungby
Prec_mm_Snow_Ljungby	Precipitation as snow(mm) at Ljungby
