# Supplementary material for: Citizen science data on rodent indoor movement provide early warning of zoonotic risk
Source: Research Square preprint supplement (doi:10.21203/rs.3.rs-8284763/v1), 2026-01-22
Supplement: Supplementary file 4 [file f0297aaa723149f39f73604e.xlsx]

## Sheet: MiH_tom_250430_SE_LanKom
ID	Year	Month	Day	species	species_2	LANSKOD	LANSNAMN	KOM_KOD	MIN_KOMMUN	North_South
93	2020	10	15	3	Mus eller råtta	14	Västra Götalands län	1440	Ale kommun	S
94	2020	10	15	3	Mus eller råtta	14	Västra Götalands län	1440	Ale kommun	S
256	2020	11	7	3	Mus eller råtta	14	Västra Götalands län	1440	Ale kommun	S
257	2020	11	7	3	Mus eller råtta	14	Västra Götalands län	1440	Ale kommun	S
361	2020	11	10	3	Mus eller råtta	14	Västra Götalands län	1440	Ale kommun	S
362	2020	11	10	3	Mus eller råtta	14	Västra Götalands län	1440	Ale kommun	S
541	2020	11	12	3	Mus eller råtta	14	Västra Götalands län	1440	Ale kommun	S
751	2020	11	16	3	Mus eller råtta	14	Västra Götalands län	1440	Ale kommun	S
752	2020	11	16	3	Mus eller råtta	14	Västra Götalands län	1440	Ale kommun	S
753	2020	11	16	3	Mus eller råtta	14	Västra Götalands län	1440	Ale kommun	S
754	2020	11	16	3	Mus eller råtta	14	Västra Götalands län	1440	Ale kommun	S
993	2020	11	20	3	Mus eller råtta	14	Västra Götalands län	1440	Ale kommun	S
994	2020	11	20	3	Mus eller råtta	14	Västra Götalands län	1440	Ale kommun	S
1110	2020	11	22	3	Mus eller råtta	14	Västra Götalands län	1440	Ale kommun	S
1111	2020	11	22	3	Mus eller råtta	14	Västra Götalands län	1440	Ale kommun	S
1112	2020	11	22	3	Mus eller råtta	14	Västra Götalands län	1440	Ale kommun	S
1113	2020	11	22	3	Mus eller råtta	14	Västra Götalands län	1440	Ale kommun	S
1114	2020	11	22	3	Mus eller råtta	14	Västra Götalands län	1440	Ale kommun	S
1115	2020	11	22	3	Mus eller råtta	14	Västra Götalands län	1440	Ale kommun	S
1456	2020	11	30	3	Mus eller råtta	14	Västra Götalands län	1440	Ale kommun	S
1457	2020	11	30	3	Mus eller råtta	14	Västra Götalands län	1440	Ale kommun	S
1762	2020	12	13	3	Mus eller råtta	14	Västra Götalands län	1440	Ale kommun	S
1763	2020	12	13	3	Mus eller råtta	14	Västra Götalands län	1440	Ale kommun	S
1957	2020	12	28	3	Mus eller råtta	14	Västra Götalands län	1440	Ale kommun	S
1958	2020	12	28	3	Mus eller råtta	14	Västra Götalands län	1440	Ale kommun	S
1959	2020	12	28	3	Mus eller råtta	14	Västra Götalands län	1440	Ale kommun	S
1960	2020	12	28	3	Mus eller råtta	14	Västra Götalands län	1440	Ale kommun	S
2167	2021	1	25	3	Mus eller råtta	14	Västra Götalands län	1440	Ale kommun	S
2209	2021	1	27	3	Mus eller råtta	14	Västra Götalands län	1440	Ale kommun	S
2288	2021	2	4	3	Mus eller råtta	14	Västra Götalands län	1440	Ale kommun	S
2608	2021	4	8	3	Mus eller råtta	14	Västra Götalands län	1440	Ale kommun	S
2609	2021	4	8	3	Mus eller råtta	14	Västra Götalands län	1440	Ale kommun	S
3468	2022	4	2	3	Mus eller råtta	14	Västra Götalands län	1440	Ale kommun	S
3469	2022	4	2	3	Mus eller råtta	14	Västra Götalands län	1440	Ale kommun	S
3738	2022	12	5	3	Mus eller råtta	14	Västra Götalands län	1440	Ale kommun	S
3874	2023	3	27	4	Näbbmus	14	Västra Götalands län	1440	Ale kommun	S
3992	2024	1	6	3	Mus eller råtta	14	Västra Götalands län	1440	Ale kommun	S
4125	2024	10	28	3	Mus eller råtta	14	Västra Götalands län	1440	Ale kommun	S
4288	2025	1	14	3	Mus eller råtta	14	Västra Götalands län	1440	Ale kommun	S
4446	2025	1	30	3	Mus eller råtta	14	Västra Götalands län	1440	Ale kommun	S
4451	2025	1	30	3	Mus eller råtta	14	Västra Götalands län	1440	Ale kommun	S
4561	2025	2	3	3	Mus eller råtta	14	Västra Götalands län	1440	Ale kommun	S
4736	2025	2	10	3	Mus eller råtta	14	Västra Götalands län	1440	Ale kommun	S
4753	2025	2	10	1904	Mindre skogsmus	14	Västra Götalands län	1440	Ale kommun	S
4770	2025	2	11	3	Mus eller råtta	14	Västra Götalands län	1440	Ale kommun	S
4804	2025	2	12	2	Lämmel eller sork	14	Västra Götalands län	1440	Ale kommun	S
4857	2025	2	14	3	Mus eller råtta	14	Västra Götalands län	1440	Ale kommun	S
5026	2025	2	16	3	Mus eller råtta	14	Västra Götalands län	1440	Ale kommun	S
5066	2025	2	16	3	Mus eller råtta	14	Västra Götalands län	1440	Ale kommun	S
5089	2025	2	16	3	Mus eller råtta	14	Västra Götalands län	1440	Ale kommun	S
5102	2025	2	16	3	Mus eller råtta	14	Västra Götalands län	1440	Ale kommun	S
5182	2025	2	17	3	Mus eller råtta	14	Västra Götalands län	1440	Ale kommun	S
5190	2025	2	17	13972	Husmus	14	Västra Götalands län	1440	Ale kommun	S
5206	2025	2	17	3	Mus eller råtta	14	Västra Götalands län	1440	Ale kommun	S
5288	2025	2	21	3	Mus eller råtta	14	Västra Götalands län	1440	Ale kommun	S
328	2020	11	9	3	Mus eller råtta	14	Västra Götalands län	1489	Alingsås kommun	S
643	2020	11	14	3	Mus eller råtta	14	Västra Götalands län	1489	Alingsås kommun	S
924	2020	11	19	1	Okänd	14	Västra Götalands län	1489	Alingsås kommun	S
1337	2020	11	26	3	Mus eller råtta	14	Västra Götalands län	1489	Alingsås kommun	S
1498	2020	12	1	3	Mus eller råtta	14	Västra Götalands län	1489	Alingsås kommun	S
1507	2020	12	2	4	Näbbmus	14	Västra Götalands län	1489	Alingsås kommun	S
1534	2020	12	3	1	Okänd	14	Västra Götalands län	1489	Alingsås kommun	S
1564	2020	12	4	3	Mus eller råtta	14	Västra Götalands län	1489	Alingsås kommun	S
1753	2020	12	12	3	Mus eller råtta	14	Västra Götalands län	1489	Alingsås kommun	S
1759	2020	12	12	3	Mus eller råtta	14	Västra Götalands län	1489	Alingsås kommun	S
4254	2025	1	8	3	Mus eller råtta	14	Västra Götalands län	1489	Alingsås kommun	S
4259	2025	1	8	3	Mus eller råtta	14	Västra Götalands län	1489	Alingsås kommun	S
4608	2025	2	5	3	Mus eller råtta	14	Västra Götalands län	1489	Alingsås kommun	S
5051	2025	2	16	3	Mus eller råtta	14	Västra Götalands län	1489	Alingsås kommun	S
5053	2025	2	16	3	Mus eller råtta	14	Västra Götalands län	1489	Alingsås kommun	S
5323	2025	2	23	3	Mus eller råtta	14	Västra Götalands län	1489	Alingsås kommun	S
5372	2025	2	25	3	Mus eller råtta	14	Västra Götalands län	1489	Alingsås kommun	S
5401	2025	2	27	3	Mus eller råtta	14	Västra Götalands län	1489	Alingsås kommun	S
2012	2021	1	3	3	Mus eller råtta	7	Kronobergs län	765	Älmhult kommun	S
4686	2025	2	8	3	Mus eller råtta	7	Kronobergs län	765	Älmhult kommun	S
1211	2020	11	23	3	Mus eller råtta	20	Dalarnas län	2039	Älvdalen kommun	N
3527	2022	8	30	3	Mus eller råtta	20	Dalarnas län	2039	Älvdalen kommun	N
3528	2022	8	30	3	Mus eller råtta	20	Dalarnas län	2039	Älvdalen kommun	N
315	2020	11	9	3	Mus eller råtta	7	Kronobergs län	764	Alvesta kommun	S
1308	2020	11	25	3	Mus eller råtta	7	Kronobergs län	764	Alvesta kommun	S
1877	2020	12	19	3	Mus eller råtta	7	Kronobergs län	764	Alvesta kommun	S
1898	2020	12	20	3	Mus eller råtta	7	Kronobergs län	764	Alvesta kommun	S
1899	2020	12	20	3	Mus eller råtta	7	Kronobergs län	764	Alvesta kommun	S
4302	2025	1	16	3	Mus eller råtta	7	Kronobergs län	764	Alvesta kommun	S
4676	2025	2	7	19353	Brunråtta	7	Kronobergs län	764	Alvesta kommun	S
4783	2025	2	12	3	Mus eller råtta	7	Kronobergs län	764	Alvesta kommun	S
4792	2025	2	12	3	Mus eller råtta	7	Kronobergs län	764	Alvesta kommun	S
4846	2025	2	14	3	Mus eller råtta	7	Kronobergs län	764	Alvesta kommun	S
119	2020	10	22	3	Mus eller råtta	3	Uppsala län	319	Älvkarleby kommun	S
149	2020	10	28	3	Mus eller råtta	3	Uppsala län	319	Älvkarleby kommun	S
220	2020	11	6	3	Mus eller råtta	3	Uppsala län	319	Älvkarleby kommun	S
2341	2021	2	12	3	Mus eller råtta	3	Uppsala län	319	Älvkarleby kommun	S
4456	2025	1	31	3	Mus eller råtta	3	Uppsala län	319	Älvkarleby kommun	S
5081	2025	2	16	1904	Mindre skogsmus	3	Uppsala län	319	Älvkarleby kommun	S
728	2020	11	15	3	Mus eller råtta	14	Västra Götalands län	1492	Åmål kommun	S
769	2020	11	16	2	Lämmel eller sork	14	Västra Götalands län	1492	Åmål kommun	S
797	2020	11	16	3	Mus eller råtta	14	Västra Götalands län	1492	Åmål kommun	S
3744	2022	12	7	3	Mus eller råtta	14	Västra Götalands län	1492	Åmål kommun	S
3745	2022	12	7	3	Mus eller råtta	14	Västra Götalands län	1492	Åmål kommun	S
3756	2022	12	11	2	Lämmel eller sork	14	Västra Götalands län	1492	Åmål kommun	S
3757	2022	12	11	3	Mus eller råtta	14	Västra Götalands län	1492	Åmål kommun	S
3758	2022	12	11	13972	Husmus	14	Västra Götalands län	1492	Åmål kommun	S
3759	2022	12	12	13972	Husmus	14	Västra Götalands län	1492	Åmål kommun	S
3784	2022	12	22	13972	Husmus	14	Västra Götalands län	1492	Åmål kommun	S
3818	2023	1	10	13972	Husmus	14	Västra Götalands län	1492	Åmål kommun	S
3980	2023	12	26	3	Mus eller råtta	14	Västra Götalands län	1492	Åmål kommun	S
3245	2021	12	21	3	Mus eller råtta	22	Västernorrlands län	2260	Ånge kommun	N
4424	2025	1	29	3	Mus eller råtta	22	Västernorrlands län	2260	Ånge kommun	N
4556	2025	2	3	3	Mus eller råtta	22	Västernorrlands län	2260	Ånge kommun	N
4752	2025	2	10	3	Mus eller råtta	22	Västernorrlands län	2260	Ånge kommun	N
267	2020	11	7	3	Mus eller råtta	12	Skåne län	1292	Ängelholm kommun	S
279	2020	11	7	2	Lämmel eller sork	12	Skåne län	1292	Ängelholm kommun	S
298	2020	11	8	3	Mus eller råtta	12	Skåne län	1292	Ängelholm kommun	S
305	2020	11	8	3	Mus eller råtta	12	Skåne län	1292	Ängelholm kommun	S
326	2020	11	9	3	Mus eller råtta	12	Skåne län	1292	Ängelholm kommun	S
339	2020	11	9	3	Mus eller råtta	12	Skåne län	1292	Ängelholm kommun	S
393	2020	11	10	2	Lämmel eller sork	12	Skåne län	1292	Ängelholm kommun	S
471	2020	11	11	2	Lämmel eller sork	12	Skåne län	1292	Ängelholm kommun	S
522	2020	11	12	2	Lämmel eller sork	12	Skåne län	1292	Ängelholm kommun	S
565	2020	11	13	3	Mus eller råtta	12	Skåne län	1292	Ängelholm kommun	S
579	2020	11	13	2	Lämmel eller sork	12	Skåne län	1292	Ängelholm kommun	S
632	2020	11	14	2	Lämmel eller sork	12	Skåne län	1292	Ängelholm kommun	S
650	2020	11	14	3	Mus eller råtta	12	Skåne län	1292	Ängelholm kommun	S
717	2020	11	15	1892	Större skogsmus	12	Skåne län	1292	Ängelholm kommun	S
718	2020	11	15	2	Lämmel eller sork	12	Skåne län	1292	Ängelholm kommun	S
798	2020	11	16	4973	Skogssork	12	Skåne län	1292	Ängelholm kommun	S
847	2020	11	17	3	Mus eller råtta	12	Skåne län	1292	Ängelholm kommun	S
861	2020	11	17	3	Mus eller råtta	12	Skåne län	1292	Ängelholm kommun	S
863	2020	11	17	3	Mus eller råtta	12	Skåne län	1292	Ängelholm kommun	S
885	2020	11	18	3	Mus eller råtta	12	Skåne län	1292	Ängelholm kommun	S
888	2020	11	18	3	Mus eller råtta	12	Skåne län	1292	Ängelholm kommun	S
906	2020	11	18	3	Mus eller råtta	12	Skåne län	1292	Ängelholm kommun	S
914	2020	11	18	3	Mus eller råtta	12	Skåne län	1292	Ängelholm kommun	S
1084	2020	11	21	2	Lämmel eller sork	12	Skåne län	1292	Ängelholm kommun	S
1163	2020	11	22	3	Mus eller råtta	12	Skåne län	1292	Ängelholm kommun	S
1221	2020	11	23	3	Mus eller råtta	12	Skåne län	1292	Ängelholm kommun	S
1222	2020	11	23	2	Lämmel eller sork	12	Skåne län	1292	Ängelholm kommun	S
1224	2020	11	23	3	Mus eller råtta	12	Skåne län	1292	Ängelholm kommun	S
1226	2020	11	23	3	Mus eller råtta	12	Skåne län	1292	Ängelholm kommun	S
1259	2020	11	24	3	Mus eller råtta	12	Skåne län	1292	Ängelholm kommun	S
1266	2020	11	24	3	Mus eller råtta	12	Skåne län	1292	Ängelholm kommun	S
1315	2020	11	25	3	Mus eller råtta	12	Skåne län	1292	Ängelholm kommun	S
1326	2020	11	25	3	Mus eller råtta	12	Skåne län	1292	Ängelholm kommun	S
1353	2020	11	26	2	Lämmel eller sork	12	Skåne län	1292	Ängelholm kommun	S
1367	2020	11	26	2	Lämmel eller sork	12	Skåne län	1292	Ängelholm kommun	S
1549	2020	12	3	3	Mus eller råtta	12	Skåne län	1292	Ängelholm kommun	S
1598	2020	12	5	2	Lämmel eller sork	12	Skåne län	1292	Ängelholm kommun	S
1601	2020	12	5	2	Lämmel eller sork	12	Skåne län	1292	Ängelholm kommun	S
1604	2020	12	5	2	Lämmel eller sork	12	Skåne län	1292	Ängelholm kommun	S
1634	2020	12	6	3	Mus eller råtta	12	Skåne län	1292	Ängelholm kommun	S
1657	2020	12	7	2	Lämmel eller sork	12	Skåne län	1292	Ängelholm kommun	S
1691	2020	12	9	2	Lämmel eller sork	12	Skåne län	1292	Ängelholm kommun	S
1698	2020	12	9	2	Lämmel eller sork	12	Skåne län	1292	Ängelholm kommun	S
1701	2020	12	9	2	Lämmel eller sork	12	Skåne län	1292	Ängelholm kommun	S
1732	2020	12	11	2	Lämmel eller sork	12	Skåne län	1292	Ängelholm kommun	S
1791	2020	12	14	2	Lämmel eller sork	12	Skåne län	1292	Ängelholm kommun	S
1815	2020	12	16	3	Mus eller råtta	12	Skåne län	1292	Ängelholm kommun	S
1817	2020	12	16	3	Mus eller råtta	12	Skåne län	1292	Ängelholm kommun	S
1820	2020	12	16	2	Lämmel eller sork	12	Skåne län	1292	Ängelholm kommun	S
1821	2020	12	16	2	Lämmel eller sork	12	Skåne län	1292	Ängelholm kommun	S
1852	2020	12	18	2	Lämmel eller sork	12	Skåne län	1292	Ängelholm kommun	S
1902	2020	12	20	2	Lämmel eller sork	12	Skåne län	1292	Ängelholm kommun	S
1942	2020	12	25	3	Mus eller råtta	12	Skåne län	1292	Ängelholm kommun	S
1995	2021	1	1	2	Lämmel eller sork	12	Skåne län	1292	Ängelholm kommun	S
2042	2021	1	8	3	Mus eller råtta	12	Skåne län	1292	Ängelholm kommun	S
2066	2021	1	11	3	Mus eller råtta	12	Skåne län	1292	Ängelholm kommun	S
2156	2021	1	24	3	Mus eller råtta	12	Skåne län	1292	Ängelholm kommun	S
2396	2021	2	17	2	Lämmel eller sork	12	Skåne län	1292	Ängelholm kommun	S
2410	2021	2	20	2	Lämmel eller sork	12	Skåne län	1292	Ängelholm kommun	S
2555	2021	3	20	3	Mus eller råtta	12	Skåne län	1292	Ängelholm kommun	S
2583	2021	3	29	2	Lämmel eller sork	12	Skåne län	1292	Ängelholm kommun	S
2584	2021	3	29	2	Lämmel eller sork	12	Skåne län	1292	Ängelholm kommun	S
2586	2021	3	29	2	Lämmel eller sork	12	Skåne län	1292	Ängelholm kommun	S
2587	2021	3	29	2	Lämmel eller sork	12	Skåne län	1292	Ängelholm kommun	S
4755	2025	2	11	3	Mus eller råtta	12	Skåne län	1292	Ängelholm kommun	S
4923	2025	2	15	3	Mus eller råtta	12	Skåne län	1292	Ängelholm kommun	S
5200	2025	2	17	3	Mus eller råtta	12	Skåne län	1292	Ängelholm kommun	S
5216	2025	2	18	3	Mus eller råtta	12	Skåne län	1292	Ängelholm kommun	S
5273	2025	2	20	3	Mus eller råtta	12	Skåne län	1292	Ängelholm kommun	S
5509	2025	3	6	3	Mus eller råtta	12	Skåne län	1292	Ängelholm kommun	S
1004	2020	11	20	3	Mus eller råtta	19	Västmanlands län	1984	Arboga kommun	S
4381	2025	1	26	3	Mus eller råtta	19	Västmanlands län	1984	Arboga kommun	S
4514	2025	2	1	3	Mus eller råtta	19	Västmanlands län	1984	Arboga kommun	S
933	2020	11	19	3	Mus eller råtta	23	Jämtlands län	2321	Åre kommun	N
934	2020	11	19	3	Mus eller råtta	23	Jämtlands län	2321	Åre kommun	N
1095	2020	11	21	3	Mus eller råtta	23	Jämtlands län	2321	Åre kommun	N
1135	2020	11	22	3	Mus eller råtta	23	Jämtlands län	2321	Åre kommun	N
1415	2020	11	28	3	Mus eller råtta	23	Jämtlands län	2321	Åre kommun	N
2242	2021	1	30	4	Näbbmus	23	Jämtlands län	2321	Åre kommun	N
2515	2021	3	12	3	Mus eller råtta	23	Jämtlands län	2321	Åre kommun	N
2539	2021	3	17	3	Mus eller råtta	23	Jämtlands län	2321	Åre kommun	N
2548	2021	3	19	3	Mus eller råtta	23	Jämtlands län	2321	Åre kommun	N
2742	2021	10	1	3	Mus eller råtta	23	Jämtlands län	2321	Åre kommun	N
2745	2021	10	2	3	Mus eller råtta	23	Jämtlands län	2321	Åre kommun	N
2753	2021	10	3	3	Mus eller råtta	23	Jämtlands län	2321	Åre kommun	N
2763	2021	10	4	3	Mus eller råtta	23	Jämtlands län	2321	Åre kommun	N
2764	2021	10	5	3	Mus eller råtta	23	Jämtlands län	2321	Åre kommun	N
2830	2021	10	20	3	Mus eller råtta	23	Jämtlands län	2321	Åre kommun	N
3707	2022	11	28	3	Mus eller råtta	23	Jämtlands län	2321	Åre kommun	N
4484	2025	2	1	3	Mus eller råtta	23	Jämtlands län	2321	Åre kommun	N
4558	2025	2	3	1	Okänd	23	Jämtlands län	2321	Åre kommun	N
773	2020	11	16	3	Mus eller råtta	17	Värmlands län	1765	Årjäng kommun	N
2669	2021	6	28	3	Mus eller råtta	17	Värmlands län	1765	Årjäng kommun	N
2670	2021	6	28	3	Mus eller råtta	17	Värmlands län	1765	Årjäng kommun	N
2936	2021	11	4	3	Mus eller råtta	17	Värmlands län	1765	Årjäng kommun	N
2937	2021	11	4	3	Mus eller råtta	17	Värmlands län	1765	Årjäng kommun	N
2941	2021	11	4	3	Mus eller råtta	17	Värmlands län	1765	Årjäng kommun	N
3069	2021	11	19	3	Mus eller råtta	17	Värmlands län	1765	Årjäng kommun	N
3723	2022	12	1	3	Mus eller råtta	17	Värmlands län	1765	Årjäng kommun	N
3736	2022	12	5	3	Mus eller råtta	17	Värmlands län	1765	Årjäng kommun	N
3740	2022	12	6	3	Mus eller råtta	17	Värmlands län	1765	Årjäng kommun	N
5659	2025	3	27	3	Mus eller råtta	25	Norrbottens län	2506	Arjeplog kommun	N
4901	2025	2	15	3	Mus eller råtta	25	Norrbottens län	2505	Arvidsjaur kommun	N
4993	2025	2	16	3	Mus eller råtta	25	Norrbottens län	2505	Arvidsjaur kommun	N
1	2020	9	1	3	Mus eller råtta	17	Värmlands län	1784	Arvika kommun	N
2	2020	9	3	3	Mus eller råtta	17	Värmlands län	1784	Arvika kommun	N
4	2020	9	4	3	Mus eller råtta	17	Värmlands län	1784	Arvika kommun	N
5	2020	9	6	3	Mus eller råtta	17	Värmlands län	1784	Arvika kommun	N
6	2020	9	9	3	Mus eller råtta	17	Värmlands län	1784	Arvika kommun	N
9	2020	9	11	3	Mus eller råtta	17	Värmlands län	1784	Arvika kommun	N
11	2020	9	12	3	Mus eller råtta	17	Värmlands län	1784	Arvika kommun	N
14	2020	9	14	3	Mus eller råtta	17	Värmlands län	1784	Arvika kommun	N
16	2020	9	16	3	Mus eller råtta	17	Värmlands län	1784	Arvika kommun	N
18	2020	9	18	3	Mus eller råtta	17	Värmlands län	1784	Arvika kommun	N
20	2020	9	20	3	Mus eller råtta	17	Värmlands län	1784	Arvika kommun	N
24	2020	9	22	3	Mus eller råtta	17	Värmlands län	1784	Arvika kommun	N
28	2020	9	27	3	Mus eller råtta	17	Värmlands län	1784	Arvika kommun	N
34	2020	9	29	3	Mus eller råtta	17	Värmlands län	1784	Arvika kommun	N
36	2020	10	1	3	Mus eller råtta	17	Värmlands län	1784	Arvika kommun	N
39	2020	10	2	3	Mus eller råtta	17	Värmlands län	1784	Arvika kommun	N
41	2020	10	4	3	Mus eller råtta	17	Värmlands län	1784	Arvika kommun	N
42	2020	10	4	3	Mus eller råtta	17	Värmlands län	1784	Arvika kommun	N
45	2020	10	6	3	Mus eller råtta	17	Värmlands län	1784	Arvika kommun	N
46	2020	10	6	3	Mus eller råtta	17	Värmlands län	1784	Arvika kommun	N
53	2020	10	9	3	Mus eller råtta	17	Värmlands län	1784	Arvika kommun	N
58	2020	10	11	3	Mus eller råtta	17	Värmlands län	1784	Arvika kommun	N
60	2020	10	14	3	Mus eller råtta	17	Värmlands län	1784	Arvika kommun	N
61	2020	10	14	3	Mus eller råtta	17	Värmlands län	1784	Arvika kommun	N
101	2020	10	16	3	Mus eller råtta	17	Värmlands län	1784	Arvika kommun	N
112	2020	10	18	3	Mus eller råtta	17	Värmlands län	1784	Arvika kommun	N
124	2020	10	23	3	Mus eller råtta	17	Värmlands län	1784	Arvika kommun	N
135	2020	10	25	3	Mus eller råtta	17	Värmlands län	1784	Arvika kommun	N
145	2020	10	27	3	Mus eller råtta	17	Värmlands län	1784	Arvika kommun	N
160	2020	10	31	3	Mus eller råtta	17	Värmlands län	1784	Arvika kommun	N
174	2020	11	1	3	Mus eller råtta	17	Värmlands län	1784	Arvika kommun	N
187	2020	11	2	3	Mus eller råtta	17	Värmlands län	1784	Arvika kommun	N
202	2020	11	4	3	Mus eller råtta	17	Värmlands län	1784	Arvika kommun	N
211	2020	11	5	3	Mus eller råtta	17	Värmlands län	1784	Arvika kommun	N
259	2020	11	7	3	Mus eller råtta	17	Värmlands län	1784	Arvika kommun	N
560	2020	11	13	3	Mus eller råtta	17	Värmlands län	1784	Arvika kommun	N
603	2020	11	14	3	Mus eller råtta	17	Värmlands län	1784	Arvika kommun	N
760	2020	11	16	3	Mus eller råtta	17	Värmlands län	1784	Arvika kommun	N
929	2020	11	19	3	Mus eller råtta	17	Värmlands län	1784	Arvika kommun	N
1000	2020	11	20	3	Mus eller råtta	17	Värmlands län	1784	Arvika kommun	N
1001	2020	11	20	3	Mus eller råtta	17	Värmlands län	1784	Arvika kommun	N
1088	2020	11	21	3	Mus eller råtta	17	Värmlands län	1784	Arvika kommun	N
1132	2020	11	22	3	Mus eller råtta	17	Värmlands län	1784	Arvika kommun	N
1209	2020	11	23	3	Mus eller råtta	17	Värmlands län	1784	Arvika kommun	N
1217	2020	11	23	3	Mus eller råtta	17	Värmlands län	1784	Arvika kommun	N
1263	2020	11	24	3	Mus eller råtta	17	Värmlands län	1784	Arvika kommun	N
1352	2020	11	26	3	Mus eller råtta	17	Värmlands län	1784	Arvika kommun	N
1402	2020	11	28	3	Mus eller råtta	17	Värmlands län	1784	Arvika kommun	N
1484	2020	12	1	3	Mus eller råtta	17	Värmlands län	1784	Arvika kommun	N
1492	2020	12	1	3	Mus eller råtta	17	Värmlands län	1784	Arvika kommun	N
1633	2020	12	6	3	Mus eller råtta	17	Värmlands län	1784	Arvika kommun	N
1643	2020	12	7	3	Mus eller råtta	17	Värmlands län	1784	Arvika kommun	N
1677	2020	12	8	3	Mus eller råtta	17	Värmlands län	1784	Arvika kommun	N
1748	2020	12	11	3	Mus eller råtta	17	Värmlands län	1784	Arvika kommun	N
1826	2020	12	16	4	Näbbmus	17	Värmlands län	1784	Arvika kommun	N
1837	2020	12	18	3	Mus eller råtta	17	Värmlands län	1784	Arvika kommun	N
1917	2020	12	22	3	Mus eller råtta	17	Värmlands län	1784	Arvika kommun	N
1971	2020	12	29	3	Mus eller råtta	17	Värmlands län	1784	Arvika kommun	N
1980	2020	12	29	3	Mus eller råtta	17	Värmlands län	1784	Arvika kommun	N
1985	2020	12	30	3	Mus eller råtta	17	Värmlands län	1784	Arvika kommun	N
2032	2021	1	8	3	Mus eller råtta	17	Värmlands län	1784	Arvika kommun	N
2142	2021	1	23	3	Mus eller råtta	17	Värmlands län	1784	Arvika kommun	N
2282	2021	2	4	3	Mus eller råtta	17	Värmlands län	1784	Arvika kommun	N
2317	2021	2	9	3	Mus eller råtta	17	Värmlands län	1784	Arvika kommun	N
2343	2021	2	12	3	Mus eller råtta	17	Värmlands län	1784	Arvika kommun	N
2414	2021	2	21	3	Mus eller råtta	17	Värmlands län	1784	Arvika kommun	N
2948	2021	11	5	3	Mus eller råtta	17	Värmlands län	1784	Arvika kommun	N
2949	2021	11	5	3	Mus eller råtta	17	Värmlands län	1784	Arvika kommun	N
2956	2021	11	5	3	Mus eller råtta	17	Värmlands län	1784	Arvika kommun	N
2958	2021	11	5	3	Mus eller råtta	17	Värmlands län	1784	Arvika kommun	N
5086	2025	2	16	3	Mus eller råtta	17	Värmlands län	1784	Arvika kommun	N
5571	2025	3	11	3	Mus eller råtta	17	Värmlands län	1784	Arvika kommun	N
5573	2025	3	11	3	Mus eller råtta	17	Värmlands län	1784	Arvika kommun	N
503	2020	11	12	3	Mus eller råtta	18	Örebro län	1882	Askersund kommun	S
517	2020	11	12	3	Mus eller råtta	18	Örebro län	1882	Askersund kommun	S
546	2020	11	12	3	Mus eller råtta	18	Örebro län	1882	Askersund kommun	S
568	2020	11	13	3	Mus eller råtta	18	Örebro län	1882	Askersund kommun	S
633	2020	11	14	3	Mus eller råtta	18	Örebro län	1882	Askersund kommun	S
594	2020	11	14	3	Mus eller råtta	12	Skåne län	1277	Åstorp kommun	S
1795	2020	12	15	3	Mus eller råtta	12	Skåne län	1277	Åstorp kommun	S
2272	2021	2	3	3	Mus eller råtta	12	Skåne län	1277	Åstorp kommun	S
2281	2021	2	4	3	Mus eller råtta	12	Skåne län	1277	Åstorp kommun	S
1232	2020	11	24	3	Mus eller råtta	5	Östergötlands län	561	Åtvidaberg kommun	S
4356	2025	1	23	3	Mus eller råtta	5	Östergötlands län	561	Åtvidaberg kommun	S
4705	2025	2	8	3	Mus eller råtta	5	Östergötlands län	561	Åtvidaberg kommun	S
4713	2025	2	9	3	Mus eller råtta	5	Östergötlands län	561	Åtvidaberg kommun	S
4795	2025	2	12	3	Mus eller råtta	5	Östergötlands län	561	Åtvidaberg kommun	S
1013	2020	11	20	3	Mus eller råtta	20	Dalarnas län	2084	Avesta kommun	N
1024	2020	11	20	3	Mus eller råtta	20	Dalarnas län	2084	Avesta kommun	N
1026	2020	11	20	3	Mus eller råtta	20	Dalarnas län	2084	Avesta kommun	N
1030	2020	11	20	3	Mus eller råtta	20	Dalarnas län	2084	Avesta kommun	N
2207	2021	1	27	3	Mus eller råtta	20	Dalarnas län	2084	Avesta kommun	N
2578	2021	3	28	2	Lämmel eller sork	20	Dalarnas län	2084	Avesta kommun	N
2704	2021	9	15	2	Lämmel eller sork	20	Dalarnas län	2084	Avesta kommun	N
2705	2021	9	17	1904	Mindre skogsmus	20	Dalarnas län	2084	Avesta kommun	N
2728	2021	9	29	3	Mus eller råtta	20	Dalarnas län	2084	Avesta kommun	N
2733	2021	9	30	1892	Större skogsmus	20	Dalarnas län	2084	Avesta kommun	N
2744	2021	10	1	1904	Mindre skogsmus	20	Dalarnas län	2084	Avesta kommun	N
2747	2021	10	2	1904	Mindre skogsmus	20	Dalarnas län	2084	Avesta kommun	N
2748	2021	10	2	1892	Större skogsmus	20	Dalarnas län	2084	Avesta kommun	N
2765	2021	10	5	1904	Mindre skogsmus	20	Dalarnas län	2084	Avesta kommun	N
2766	2021	10	5	1904	Mindre skogsmus	20	Dalarnas län	2084	Avesta kommun	N
2770	2021	10	7	1904	Mindre skogsmus	20	Dalarnas län	2084	Avesta kommun	N
2847	2021	10	22	19353	Brunråtta	20	Dalarnas län	2084	Avesta kommun	N
2887	2021	10	29	1904	Mindre skogsmus	20	Dalarnas län	2084	Avesta kommun	N
2888	2021	10	29	1904	Mindre skogsmus	20	Dalarnas län	2084	Avesta kommun	N
2904	2021	10	31	1892	Större skogsmus	20	Dalarnas län	2084	Avesta kommun	N
2922	2021	11	3	4973	Skogssork	20	Dalarnas län	2084	Avesta kommun	N
2939	2021	11	4	3	Mus eller råtta	20	Dalarnas län	2084	Avesta kommun	N
2957	2021	11	5	4973	Skogssork	20	Dalarnas län	2084	Avesta kommun	N
3001	2021	11	9	1892	Större skogsmus	20	Dalarnas län	2084	Avesta kommun	N
3139	2021	11	30	2	Lämmel eller sork	20	Dalarnas län	2084	Avesta kommun	N
3187	2021	12	10	2	Lämmel eller sork	20	Dalarnas län	2084	Avesta kommun	N
3266	2021	12	30	2	Lämmel eller sork	20	Dalarnas län	2084	Avesta kommun	N
3269	2021	12	31	2	Lämmel eller sork	20	Dalarnas län	2084	Avesta kommun	N
3271	2021	12	31	2	Lämmel eller sork	20	Dalarnas län	2084	Avesta kommun	N
3274	2022	1	1	1904	Mindre skogsmus	20	Dalarnas län	2084	Avesta kommun	N
3279	2022	1	4	2	Lämmel eller sork	20	Dalarnas län	2084	Avesta kommun	N
3285	2022	1	6	3	Mus eller råtta	20	Dalarnas län	2084	Avesta kommun	N
4550	2025	2	2	13972	Husmus	20	Dalarnas län	2084	Avesta kommun	N
4722	2025	2	9	2	Lämmel eller sork	20	Dalarnas län	2084	Avesta kommun	N
4796	2025	2	12	3	Mus eller råtta	20	Dalarnas län	2084	Avesta kommun	N
5001	2025	2	16	3	Mus eller råtta	20	Dalarnas län	2084	Avesta kommun	N
5430	2025	3	1	3	Mus eller råtta	20	Dalarnas län	2084	Avesta kommun	N
255	2020	11	7	3	Mus eller råtta	12	Skåne län	1278	Båstad kommun	S
318	2020	11	9	3	Mus eller råtta	12	Skåne län	1278	Båstad kommun	S
695	2020	11	15	3	Mus eller råtta	12	Skåne län	1278	Båstad kommun	S
1108	2020	11	22	3	Mus eller råtta	12	Skåne län	1278	Båstad kommun	S
4583	2025	2	4	1	Okänd	12	Skåne län	1278	Båstad kommun	S
4772	2025	2	11	3	Mus eller råtta	12	Skåne län	1278	Båstad kommun	S
4904	2025	2	15	3	Mus eller råtta	12	Skåne län	1278	Båstad kommun	S
5006	2025	2	16	3	Mus eller råtta	12	Skåne län	1278	Båstad kommun	S
5350	2025	2	24	1	Okänd	12	Skåne län	1278	Båstad kommun	S
5357	2025	2	24	1	Okänd	12	Skåne län	1278	Båstad kommun	S
5583	2025	3	14	3	Mus eller råtta	12	Skåne län	1278	Båstad kommun	S
15	2020	9	15	3	Mus eller råtta	14	Västra Götalands län	1460	Bengtsfors kommun	S
95	2020	10	15	3	Mus eller råtta	14	Västra Götalands län	1460	Bengtsfors kommun	S
363	2020	11	10	3	Mus eller råtta	14	Västra Götalands län	1460	Bengtsfors kommun	S
514	2020	11	12	3	Mus eller råtta	14	Västra Götalands län	1460	Bengtsfors kommun	S
534	2020	11	12	3	Mus eller råtta	14	Västra Götalands län	1460	Bengtsfors kommun	S
859	2020	11	17	3	Mus eller råtta	14	Västra Götalands län	1460	Bengtsfors kommun	S
870	2020	11	18	3	Mus eller råtta	14	Västra Götalands län	1460	Bengtsfors kommun	S
4992	2025	2	16	3	Mus eller råtta	14	Västra Götalands län	1460	Bengtsfors kommun	S
5174	2025	2	17	3	Mus eller råtta	14	Västra Götalands län	1460	Bengtsfors kommun	S
5241	2025	2	18	3	Mus eller råtta	14	Västra Götalands län	1460	Bengtsfors kommun	S
5367	2025	2	25	3	Mus eller råtta	14	Västra Götalands län	1460	Bengtsfors kommun	S
1592	2020	12	5	3	Mus eller råtta	23	Jämtlands län	2326	Berg kommun	N
414	2020	11	10	4	Näbbmus	24	Västerbottens län	2403	Bjurholm kommun	N
2711	2021	9	20	3	Mus eller råtta	24	Västerbottens län	2403	Bjurholm kommun	N
4312	2025	1	16	4	Näbbmus	24	Västerbottens län	2403	Bjurholm kommun	N
243	2020	11	6	3	Mus eller råtta	12	Skåne län	1260	Bjuv kommun	S
276	2020	11	7	3	Mus eller råtta	12	Skåne län	1260	Bjuv kommun	S
283	2020	11	7	3	Mus eller råtta	12	Skåne län	1260	Bjuv kommun	S
3064	2021	11	18	3	Mus eller råtta	25	Norrbottens län	2582	Boden kommun	N
3080	2021	11	20	3	Mus eller råtta	25	Norrbottens län	2582	Boden kommun	N
3614	2022	10	24	3	Mus eller råtta	25	Norrbottens län	2582	Boden kommun	N
3615	2022	10	24	3	Mus eller råtta	25	Norrbottens län	2582	Boden kommun	N
4951	2025	2	15	3	Mus eller råtta	25	Norrbottens län	2582	Boden kommun	N
4971	2025	2	15	4	Näbbmus	25	Norrbottens län	2582	Boden kommun	N
5306	2025	2	22	4	Näbbmus	25	Norrbottens län	2582	Boden kommun	N
5610	2025	3	17	4	Näbbmus	25	Norrbottens län	2582	Boden kommun	N
5622	2025	3	20	3	Mus eller råtta	25	Norrbottens län	2582	Boden kommun	N
5643	2025	3	24	3	Mus eller råtta	25	Norrbottens län	2582	Boden kommun	N
458	2020	11	11	3	Mus eller råtta	14	Västra Götalands län	1443	Bollebygd kommun	S
691	2020	11	15	3	Mus eller råtta	14	Västra Götalands län	1443	Bollebygd kommun	S
803	2020	11	16	3	Mus eller råtta	14	Västra Götalands län	1443	Bollebygd kommun	S
819	2020	11	17	3	Mus eller råtta	14	Västra Götalands län	1443	Bollebygd kommun	S
831	2020	11	17	3	Mus eller råtta	14	Västra Götalands län	1443	Bollebygd kommun	S
1505	2020	12	1	3	Mus eller råtta	14	Västra Götalands län	1443	Bollebygd kommun	S
1813	2020	12	16	3	Mus eller råtta	14	Västra Götalands län	1443	Bollebygd kommun	S
2016	2021	1	5	3	Mus eller råtta	14	Västra Götalands län	1443	Bollebygd kommun	S
2168	2021	1	25	3	Mus eller råtta	14	Västra Götalands län	1443	Bollebygd kommun	S
3054	2021	11	17	3	Mus eller råtta	14	Västra Götalands län	1443	Bollebygd kommun	S
3056	2021	11	17	3	Mus eller råtta	14	Västra Götalands län	1443	Bollebygd kommun	S
3150	2021	12	1	3	Mus eller råtta	14	Västra Götalands län	1443	Bollebygd kommun	S
4350	2025	1	23	3	Mus eller råtta	14	Västra Götalands län	1443	Bollebygd kommun	S
4352	2025	1	23	3	Mus eller råtta	14	Västra Götalands län	1443	Bollebygd kommun	S
4422	2025	1	29	3	Mus eller råtta	14	Västra Götalands län	1443	Bollebygd kommun	S
4518	2025	2	1	3	Mus eller råtta	14	Västra Götalands län	1443	Bollebygd kommun	S
4573	2025	2	4	3	Mus eller råtta	14	Västra Götalands län	1443	Bollebygd kommun	S
4639	2025	2	6	3	Mus eller råtta	14	Västra Götalands län	1443	Bollebygd kommun	S
4728	2025	2	9	3	Mus eller råtta	14	Västra Götalands län	1443	Bollebygd kommun	S
5017	2025	2	16	3	Mus eller råtta	14	Västra Götalands län	1443	Bollebygd kommun	S
5195	2025	2	17	3	Mus eller råtta	14	Västra Götalands län	1443	Bollebygd kommun	S
605	2020	11	14	3	Mus eller råtta	21	Gävleborgs län	2183	Bollnäs kommun	N
889	2020	11	18	3	Mus eller råtta	21	Gävleborgs län	2183	Bollnäs kommun	N
2362	2021	2	14	4	Näbbmus	21	Gävleborgs län	2183	Bollnäs kommun	N
2363	2021	2	14	3	Mus eller råtta	21	Gävleborgs län	2183	Bollnäs kommun	N
2364	2021	2	14	4	Näbbmus	21	Gävleborgs län	2183	Bollnäs kommun	N
2365	2021	2	14	4	Näbbmus	21	Gävleborgs län	2183	Bollnäs kommun	N
2491	2021	3	7	2	Lämmel eller sork	21	Gävleborgs län	2183	Bollnäs kommun	N
3748	2022	12	7	3	Mus eller råtta	21	Gävleborgs län	2183	Bollnäs kommun	N
4354	2025	1	23	3	Mus eller råtta	21	Gävleborgs län	2183	Bollnäs kommun	N
4789	2025	2	12	3	Mus eller råtta	21	Gävleborgs län	2183	Bollnäs kommun	N
4802	2025	2	12	3	Mus eller råtta	21	Gävleborgs län	2183	Bollnäs kommun	N
5103	2025	2	16	3	Mus eller råtta	21	Gävleborgs län	2183	Bollnäs kommun	N
5124	2025	2	16	3	Mus eller råtta	21	Gävleborgs län	2183	Bollnäs kommun	N
5409	2025	2	28	4	Näbbmus	21	Gävleborgs län	2183	Bollnäs kommun	N
344	2020	11	9	3	Mus eller råtta	14	Västra Götalands län	1490	Borås kommun	S
1431	2020	11	29	3	Mus eller råtta	14	Västra Götalands län	1490	Borås kommun	S
1441	2020	11	29	3	Mus eller råtta	14	Västra Götalands län	1490	Borås kommun	S
1857	2020	12	18	3	Mus eller råtta	14	Västra Götalands län	1490	Borås kommun	S
2607	2021	4	7	3	Mus eller råtta	14	Västra Götalands län	1490	Borås kommun	S
2703	2021	9	14	3	Mus eller råtta	14	Västra Götalands län	1490	Borås kommun	S
2923	2021	11	3	1	Okänd	14	Västra Götalands län	1490	Borås kommun	S
3004	2021	11	10	3	Mus eller råtta	14	Västra Götalands län	1490	Borås kommun	S
3005	2021	11	10	3	Mus eller råtta	14	Västra Götalands län	1490	Borås kommun	S
3024	2021	11	12	3	Mus eller råtta	14	Västra Götalands län	1490	Borås kommun	S
3045	2021	11	15	1	Okänd	14	Västra Götalands län	1490	Borås kommun	S
3051	2021	11	16	3	Mus eller råtta	14	Västra Götalands län	1490	Borås kommun	S
3062	2021	11	18	3	Mus eller råtta	14	Västra Götalands län	1490	Borås kommun	S
3110	2021	11	24	3	Mus eller råtta	14	Västra Götalands län	1490	Borås kommun	S
3113	2021	11	24	3	Mus eller råtta	14	Västra Götalands län	1490	Borås kommun	S
3665	2022	11	12	3	Mus eller råtta	14	Västra Götalands län	1490	Borås kommun	S
3674	2022	11	15	3	Mus eller råtta	14	Västra Götalands län	1490	Borås kommun	S
3905	2023	10	20	13972	Husmus	14	Västra Götalands län	1490	Borås kommun	S
3916	2023	10	29	3	Mus eller råtta	14	Västra Götalands län	1490	Borås kommun	S
4241	2025	1	5	3	Mus eller råtta	14	Västra Götalands län	1490	Borås kommun	S
4659	2025	2	7	3	Mus eller råtta	14	Västra Götalands län	1490	Borås kommun	S
4763	2025	2	11	3	Mus eller råtta	14	Västra Götalands län	1490	Borås kommun	S
4964	2025	2	15	3	Mus eller råtta	13	Västra Götalands län	1490	Borås kommun	S
4985	2025	2	15	3	Mus eller råtta	14	Västra Götalands län	1490	Borås kommun	S
2169	2021	1	26	3	Mus eller råtta	8	Kalmar län	885	Borgholm kommun	S
2360	2021	2	14	3	Mus eller råtta	8	Kalmar län	885	Borgholm kommun	S
2424	2021	2	25	3	Mus eller råtta	8	Kalmar län	885	Borgholm kommun	S
4443	2025	1	30	3	Mus eller råtta	8	Kalmar län	885	Borgholm kommun	S
4939	2025	2	15	3	Mus eller råtta	8	Kalmar län	885	Borgholm kommun	S
5044	2025	2	16	3	Mus eller råtta	8	Kalmar län	885	Borgholm kommun	S
5096	2025	2	16	3	Mus eller råtta	8	Kalmar län	885	Borgholm kommun	S
5144	2025	2	16	3	Mus eller råtta	8	Kalmar län	885	Borgholm kommun	S
5154	2025	2	16	3	Mus eller råtta	8	Kalmar län	885	Borgholm kommun	S
5295	2025	2	21	4	Näbbmus	8	Kalmar län	885	Borgholm kommun	S
373	2020	11	10	3	Mus eller råtta	20	Dalarnas län	2081	Borlänge kommun	N
374	2020	11	10	3	Mus eller råtta	20	Dalarnas län	2081	Borlänge kommun	N
375	2020	11	10	3	Mus eller råtta	20	Dalarnas län	2081	Borlänge kommun	N
376	2020	11	10	3	Mus eller råtta	20	Dalarnas län	2081	Borlänge kommun	N
2159	2021	1	25	3	Mus eller råtta	20	Dalarnas län	2081	Borlänge kommun	N
2160	2021	1	25	3	Mus eller råtta	20	Dalarnas län	2081	Borlänge kommun	N
2161	2021	1	25	3	Mus eller råtta	20	Dalarnas län	2081	Borlänge kommun	N
2162	2021	1	25	3	Mus eller råtta	20	Dalarnas län	2081	Borlänge kommun	N
4467	2025	1	31	3	Mus eller råtta	20	Dalarnas län	2081	Borlänge kommun	N
4544	2025	2	2	3	Mus eller råtta	20	Dalarnas län	2081	Borlänge kommun	N
4836	2025	2	14	3	Mus eller råtta	20	Dalarnas län	2081	Borlänge kommun	N
4881	2025	2	14	3	Mus eller råtta	20	Dalarnas län	2081	Borlänge kommun	N
4885	2025	2	14	3	Mus eller råtta	20	Dalarnas län	2081	Borlänge kommun	N
4889	2025	2	14	3	Mus eller råtta	20	Dalarnas län	2081	Borlänge kommun	N
4917	2025	2	15	3	Mus eller råtta	20	Dalarnas län	2081	Borlänge kommun	N
5037	2025	2	16	3	Mus eller råtta	20	Dalarnas län	2081	Borlänge kommun	N
5052	2025	2	16	3	Mus eller råtta	20	Dalarnas län	2081	Borlänge kommun	N
5054	2025	2	16	3	Mus eller råtta	20	Dalarnas län	2081	Borlänge kommun	N
5191	2025	2	17	3	Mus eller råtta	20	Dalarnas län	2081	Borlänge kommun	N
5199	2025	2	17	3	Mus eller råtta	20	Dalarnas län	2081	Borlänge kommun	N
5421	2025	2	28	3	Mus eller råtta	20	Dalarnas län	2081	Borlänge kommun	N
5427	2025	3	1	3	Mus eller råtta	20	Dalarnas län	2081	Borlänge kommun	N
5449	2025	3	2	3	Mus eller råtta	20	Dalarnas län	2081	Borlänge kommun	N
5458	2025	3	2	3	Mus eller råtta	20	Dalarnas län	2081	Borlänge kommun	N
5465	2025	3	2	3	Mus eller råtta	20	Dalarnas län	2081	Borlänge kommun	N
5657	2025	3	27	3	Mus eller råtta	20	Dalarnas län	2081	Borlänge kommun	N
851	2020	11	17	3	Mus eller råtta	1	Stockholms län	127	Botkyrka kommun	S
5319	2025	2	22	3	Mus eller råtta	1	Stockholms län	127	Botkyrka kommun	S
5348	2025	2	24	1892	Större skogsmus	1	Stockholms län	127	Botkyrka kommun	S
355	2020	11	10	3	Mus eller råtta	5	Östergötlands län	560	Boxholm kommun	S
387	2020	11	10	3	Mus eller råtta	5	Östergötlands län	560	Boxholm kommun	S
468	2020	11	11	3	Mus eller råtta	5	Östergötlands län	560	Boxholm kommun	S
582	2020	11	13	3	Mus eller råtta	5	Östergötlands län	560	Boxholm kommun	S
588	2020	11	13	3	Mus eller råtta	5	Östergötlands län	560	Boxholm kommun	S
1102	2020	11	22	3	Mus eller råtta	5	Östergötlands län	560	Boxholm kommun	S
4571	2025	2	4	3	Mus eller råtta	23	Jämtlands län	2305	Bräcke kommun	N
648	2020	11	14	1892	Större skogsmus	12	Skåne län	1272	Bromölla kommun	S
1227	2020	11	23	1892	Större skogsmus	12	Skåne län	1272	Bromölla kommun	S
5242	2025	2	19	3	Mus eller råtta	12	Skåne län	1272	Bromölla kommun	S
504	2020	11	12	3	Mus eller råtta	12	Skåne län	1231	Burlöv kommun	S
2402	2021	2	18	3	Mus eller råtta	1	Stockholms län	162	Danderyd kommun	S
2445	2021	2	27	3	Mus eller råtta	1	Stockholms län	162	Danderyd kommun	S
2466	2021	3	2	3	Mus eller råtta	1	Stockholms län	162	Danderyd kommun	S
2487	2021	3	6	3	Mus eller råtta	1	Stockholms län	162	Danderyd kommun	S
5444	2025	3	2	3	Mus eller råtta	1	Stockholms län	162	Danderyd kommun	S
5445	2025	3	2	3	Mus eller råtta	1	Stockholms län	162	Danderyd kommun	S
5451	2025	3	2	3	Mus eller råtta	1	Stockholms län	162	Danderyd kommun	S
5452	2025	3	2	3	Mus eller råtta	1	Stockholms län	162	Danderyd kommun	S
5455	2025	3	2	3	Mus eller råtta	1	Stockholms län	162	Danderyd kommun	S
5457	2025	3	2	3	Mus eller råtta	1	Stockholms län	162	Danderyd kommun	S
5459	2025	3	2	3	Mus eller råtta	1	Stockholms län	162	Danderyd kommun	S
5460	2025	3	2	3	Mus eller råtta	1	Stockholms län	162	Danderyd kommun	S
5463	2025	3	2	3	Mus eller råtta	1	Stockholms län	162	Danderyd kommun	S
5468	2025	3	2	3	Mus eller råtta	1	Stockholms län	162	Danderyd kommun	S
5473	2025	3	2	3	Mus eller råtta	1	Stockholms län	162	Danderyd kommun	S
4619	2025	2	5	3	Mus eller råtta	18	Örebro län	1862	Degerfors kommun	S
4725	2025	2	9	3	Mus eller råtta	18	Örebro län	1862	Degerfors kommun	S
4774	2025	2	11	3	Mus eller råtta	18	Örebro län	1862	Degerfors kommun	S
5113	2025	2	16	3	Mus eller råtta	18	Örebro län	1862	Degerfors kommun	S
5202	2025	2	17	3	Mus eller råtta	18	Örebro län	1862	Degerfors kommun	S
5456	2025	3	2	3	Mus eller råtta	18	Örebro län	1862	Degerfors kommun	S
96	2020	10	15	3	Mus eller råtta	17	Värmlands län	1730	Eda kommun	N
102	2020	10	16	3	Mus eller råtta	17	Värmlands län	1730	Eda kommun	N
173	2020	11	1	3	Mus eller råtta	17	Värmlands län	1730	Eda kommun	N
185	2020	11	2	3	Mus eller råtta	17	Värmlands län	1730	Eda kommun	N
757	2020	11	16	3	Mus eller råtta	17	Värmlands län	1730	Eda kommun	N
1383	2020	11	27	3	Mus eller råtta	17	Värmlands län	1730	Eda kommun	N
1401	2020	11	28	3	Mus eller råtta	17	Värmlands län	1730	Eda kommun	N
1426	2020	11	28	3	Mus eller råtta	17	Värmlands län	1730	Eda kommun	N
5090	2025	2	16	3	Mus eller råtta	17	Värmlands län	1730	Eda kommun	N
3222	2021	12	18	1	Okänd	1	Stockholms län	125	Ekerö kommun	S
3223	2021	12	18	1	Okänd	1	Stockholms län	125	Ekerö kommun	S
3254	2021	12	24	1	Okänd	1	Stockholms län	125	Ekerö kommun	S
3776	2022	12	17	3	Mus eller råtta	1	Stockholms län	125	Ekerö kommun	S
4240	2025	1	5	3	Mus eller råtta	1	Stockholms län	125	Ekerö kommun	S
4276	2025	1	11	3	Mus eller råtta	1	Stockholms län	125	Ekerö kommun	S
4369	2025	1	25	3	Mus eller råtta	1	Stockholms län	125	Ekerö kommun	S
4493	2025	2	1	3	Mus eller råtta	1	Stockholms län	125	Ekerö kommun	S
4697	2025	2	8	3	Mus eller råtta	1	Stockholms län	125	Ekerö kommun	S
4718	2025	2	9	3	Mus eller råtta	1	Stockholms län	125	Ekerö kommun	S
5097	2025	2	16	3	Mus eller råtta	1	Stockholms län	125	Ekerö kommun	S
5677	2025	4	15	3	Mus eller råtta	1	Stockholms län	125	Ekerö kommun	S
5752	2025	4	15	1904	Mindre skogsmus	1	Stockholms län	125	Ekerö kommun	S
5753	2025	4	15	1904	Mindre skogsmus	1	Stockholms län	125	Ekerö kommun	S
5754	2025	4	15	1904	Mindre skogsmus	1	Stockholms län	125	Ekerö kommun	S
5757	2025	4	15	1904	Mindre skogsmus	1	Stockholms län	125	Ekerö kommun	S
5758	2025	4	15	1904	Mindre skogsmus	1	Stockholms län	125	Ekerö kommun	S
5759	2025	4	15	1904	Mindre skogsmus	1	Stockholms län	125	Ekerö kommun	S
5760	2025	4	15	2	Lämmel eller sork	1	Stockholms län	125	Ekerö kommun	S
5761	2025	4	15	2	Lämmel eller sork	1	Stockholms län	125	Ekerö kommun	S
5762	2025	4	15	2	Lämmel eller sork	1	Stockholms län	125	Ekerö kommun	S
418	2020	11	10	3	Mus eller råtta	6	Jönköpings län	686	Eksjö kommun	S
475	2020	11	11	3	Mus eller råtta	6	Jönköpings län	686	Eksjö kommun	S
572	2020	11	13	3	Mus eller råtta	6	Jönköpings län	686	Eksjö kommun	S
622	2020	11	14	3	Mus eller råtta	6	Jönköpings län	686	Eksjö kommun	S
630	2020	11	14	3	Mus eller råtta	6	Jönköpings län	686	Eksjö kommun	S
709	2020	11	15	3	Mus eller råtta	6	Jönköpings län	686	Eksjö kommun	S
778	2020	11	16	3	Mus eller råtta	6	Jönköpings län	686	Eksjö kommun	S
816	2020	11	17	3	Mus eller råtta	6	Jönköpings län	686	Eksjö kommun	S
817	2020	11	17	3	Mus eller råtta	6	Jönköpings län	686	Eksjö kommun	S
824	2020	11	17	3	Mus eller råtta	6	Jönköpings län	686	Eksjö kommun	S
835	2020	11	17	3	Mus eller råtta	6	Jönköpings län	686	Eksjö kommun	S
843	2020	11	17	3	Mus eller råtta	6	Jönköpings län	686	Eksjö kommun	S
896	2020	11	18	3	Mus eller råtta	6	Jönköpings län	686	Eksjö kommun	S
898	2020	11	18	3	Mus eller råtta	6	Jönköpings län	686	Eksjö kommun	S
980	2020	11	19	3	Mus eller råtta	6	Jönköpings län	686	Eksjö kommun	S
1010	2020	11	20	3	Mus eller råtta	6	Jönköpings län	686	Eksjö kommun	S
1016	2020	11	20	3	Mus eller råtta	6	Jönköpings län	686	Eksjö kommun	S
1035	2020	11	20	3	Mus eller råtta	6	Jönköpings län	686	Eksjö kommun	S
1149	2020	11	22	3	Mus eller råtta	6	Jönköpings län	686	Eksjö kommun	S
1155	2020	11	22	3	Mus eller råtta	6	Jönköpings län	686	Eksjö kommun	S
1469	2020	11	30	3	Mus eller råtta	6	Jönköpings län	686	Eksjö kommun	S
1503	2020	12	1	3	Mus eller råtta	6	Jönköpings län	686	Eksjö kommun	S
1547	2020	12	3	3	Mus eller råtta	6	Jönköpings län	686	Eksjö kommun	S
1574	2020	12	4	3	Mus eller råtta	6	Jönköpings län	686	Eksjö kommun	S
1602	2020	12	5	3	Mus eller råtta	6	Jönköpings län	686	Eksjö kommun	S
1614	2020	12	5	3	Mus eller råtta	6	Jönköpings län	686	Eksjö kommun	S
1636	2020	12	6	3	Mus eller råtta	6	Jönköpings län	686	Eksjö kommun	S
1652	2020	12	7	3	Mus eller råtta	6	Jönköpings län	686	Eksjö kommun	S
1653	2020	12	7	3	Mus eller råtta	6	Jönköpings län	686	Eksjö kommun	S
1654	2020	12	7	3	Mus eller råtta	6	Jönköpings län	686	Eksjö kommun	S
1672	2020	12	8	3	Mus eller råtta	6	Jönköpings län	686	Eksjö kommun	S
1675	2020	12	8	3	Mus eller råtta	6	Jönköpings län	686	Eksjö kommun	S
1697	2020	12	9	3	Mus eller råtta	6	Jönköpings län	686	Eksjö kommun	S
1700	2020	12	9	3	Mus eller råtta	6	Jönköpings län	686	Eksjö kommun	S
1742	2020	12	11	3	Mus eller råtta	6	Jönköpings län	686	Eksjö kommun	S
1770	2020	12	13	3	Mus eller råtta	6	Jönköpings län	686	Eksjö kommun	S
1773	2020	12	13	3	Mus eller råtta	6	Jönköpings län	686	Eksjö kommun	S
2022	2021	1	6	3	Mus eller råtta	6	Jönköpings län	686	Eksjö kommun	S
2035	2021	1	8	3	Mus eller råtta	6	Jönköpings län	686	Eksjö kommun	S
2314	2021	2	8	3	Mus eller råtta	6	Jönköpings län	686	Eksjö kommun	S
4289	2025	1	14	3	Mus eller råtta	6	Jönköpings län	686	Eksjö kommun	S
4434	2025	1	29	3	Mus eller råtta	6	Jönköpings län	686	Eksjö kommun	S
4547	2025	2	2	3	Mus eller råtta	6	Jönköpings län	686	Eksjö kommun	S
4991	2025	2	16	3	Mus eller råtta	6	Jönköpings län	686	Eksjö kommun	S
845	2020	11	17	4	Näbbmus	8	Kalmar län	862	Emmaboda kommun	S
1801	2020	12	15	3	Mus eller råtta	8	Kalmar län	862	Emmaboda kommun	S
1825	2020	12	16	3	Mus eller råtta	8	Kalmar län	862	Emmaboda kommun	S
2094	2021	1	15	13972	Husmus	8	Kalmar län	862	Emmaboda kommun	S
2109	2021	1	17	13972	Husmus	8	Kalmar län	862	Emmaboda kommun	S
2119	2021	1	18	13972	Husmus	8	Kalmar län	862	Emmaboda kommun	S
5290	2025	2	21	3	Mus eller råtta	8	Kalmar län	862	Emmaboda kommun	S
5298	2025	2	21	3	Mus eller råtta	8	Kalmar län	862	Emmaboda kommun	S
13	2020	9	14	3	Mus eller råtta	3	Uppsala län	381	Enköping kommun	S
32	2020	9	28	3	Mus eller råtta	3	Uppsala län	381	Enköping kommun	S
33	2020	9	29	3	Mus eller råtta	3	Uppsala län	381	Enköping kommun	S
120	2020	10	22	3	Mus eller råtta	3	Uppsala län	381	Enköping kommun	S
121	2020	10	22	3	Mus eller råtta	3	Uppsala län	381	Enköping kommun	S
154	2020	10	28	3	Mus eller råtta	3	Uppsala län	381	Enköping kommun	S
155	2020	10	29	3	Mus eller råtta	3	Uppsala län	381	Enköping kommun	S
169	2020	11	1	3	Mus eller råtta	3	Uppsala län	381	Enköping kommun	S
182	2020	11	1	3	Mus eller råtta	3	Uppsala län	381	Enköping kommun	S
249	2020	11	7	3	Mus eller råtta	3	Uppsala län	381	Enköping kommun	S
281	2020	11	7	3	Mus eller råtta	3	Uppsala län	381	Enköping kommun	S
288	2020	11	8	3	Mus eller råtta	3	Uppsala län	381	Enköping kommun	S
294	2020	11	8	3	Mus eller råtta	3	Uppsala län	381	Enköping kommun	S
303	2020	11	8	3	Mus eller råtta	3	Uppsala län	381	Enköping kommun	S
306	2020	11	8	3	Mus eller råtta	3	Uppsala län	381	Enköping kommun	S
343	2020	11	9	3	Mus eller råtta	3	Uppsala län	381	Enköping kommun	S
397	2020	11	10	3	Mus eller råtta	3	Uppsala län	381	Enköping kommun	S
405	2020	11	10	3	Mus eller råtta	3	Uppsala län	381	Enköping kommun	S
456	2020	11	11	3	Mus eller råtta	3	Uppsala län	381	Enköping kommun	S
519	2020	11	12	3	Mus eller råtta	3	Uppsala län	381	Enköping kommun	S
520	2020	11	12	3	Mus eller råtta	3	Uppsala län	381	Enköping kommun	S
521	2020	11	12	3	Mus eller råtta	3	Uppsala län	381	Enköping kommun	S
549	2020	11	13	3	Mus eller råtta	3	Uppsala län	381	Enköping kommun	S
550	2020	11	13	3	Mus eller råtta	3	Uppsala län	381	Enköping kommun	S
551	2020	11	13	3	Mus eller råtta	3	Uppsala län	381	Enköping kommun	S
552	2020	11	13	3	Mus eller råtta	3	Uppsala län	381	Enköping kommun	S
553	2020	11	13	3	Mus eller råtta	3	Uppsala län	381	Enköping kommun	S
591	2020	11	14	3	Mus eller råtta	3	Uppsala län	381	Enköping kommun	S
592	2020	11	14	3	Mus eller råtta	3	Uppsala län	381	Enköping kommun	S
631	2020	11	14	3	Mus eller råtta	3	Uppsala län	381	Enköping kommun	S
649	2020	11	14	3	Mus eller råtta	3	Uppsala län	381	Enköping kommun	S
656	2020	11	15	3	Mus eller råtta	3	Uppsala län	381	Enköping kommun	S
742	2020	11	16	3	Mus eller råtta	3	Uppsala län	381	Enköping kommun	S
804	2020	11	17	3	Mus eller råtta	3	Uppsala län	381	Enköping kommun	S
805	2020	11	17	3	Mus eller råtta	3	Uppsala län	381	Enköping kommun	S
915	2020	11	18	3	Mus eller råtta	3	Uppsala län	381	Enköping kommun	S
1207	2020	11	23	3	Mus eller råtta	3	Uppsala län	381	Enköping kommun	S
1215	2020	11	23	3	Mus eller råtta	3	Uppsala län	381	Enköping kommun	S
1219	2020	11	23	3	Mus eller råtta	3	Uppsala län	381	Enköping kommun	S
1260	2020	11	24	3	Mus eller råtta	3	Uppsala län	381	Enköping kommun	S
1268	2020	11	24	3	Mus eller råtta	3	Uppsala län	381	Enköping kommun	S
1279	2020	11	25	3	Mus eller råtta	3	Uppsala län	381	Enköping kommun	S
1309	2020	11	25	3	Mus eller råtta	3	Uppsala län	381	Enköping kommun	S
1346	2020	11	26	3	Mus eller råtta	3	Uppsala län	381	Enköping kommun	S
1368	2020	11	26	3	Mus eller råtta	3	Uppsala län	381	Enköping kommun	S
1438	2020	11	29	3	Mus eller råtta	3	Uppsala län	381	Enköping kommun	S
1480	2020	12	1	3	Mus eller råtta	3	Uppsala län	381	Enköping kommun	S
1516	2020	12	2	3	Mus eller råtta	3	Uppsala län	381	Enköping kommun	S
1650	2020	12	7	3	Mus eller råtta	3	Uppsala län	381	Enköping kommun	S
1673	2020	12	8	3	Mus eller råtta	3	Uppsala län	381	Enköping kommun	S
1712	2020	12	10	3	Mus eller råtta	3	Uppsala län	381	Enköping kommun	S
1756	2020	12	12	3	Mus eller råtta	3	Uppsala län	381	Enköping kommun	S
1824	2020	12	16	3	Mus eller råtta	3	Uppsala län	381	Enköping kommun	S
1850	2020	12	18	3	Mus eller råtta	3	Uppsala län	381	Enköping kommun	S
1863	2020	12	18	3	Mus eller råtta	3	Uppsala län	381	Enköping kommun	S
1866	2020	12	18	3	Mus eller råtta	3	Uppsala län	381	Enköping kommun	S
2041	2021	1	8	3	Mus eller råtta	3	Uppsala län	381	Enköping kommun	S
2254	2021	2	1	3	Mus eller råtta	3	Uppsala län	381	Enköping kommun	S
2356	2021	2	13	3	Mus eller råtta	3	Uppsala län	381	Enköping kommun	S
2376	2021	2	15	4	Näbbmus	3	Uppsala län	381	Enköping kommun	S
2495	2021	3	7	3	Mus eller råtta	3	Uppsala län	381	Enköping kommun	S
2519	2021	3	13	3	Mus eller råtta	3	Uppsala län	381	Enköping kommun	S
2521	2021	3	13	3	Mus eller råtta	3	Uppsala län	381	Enköping kommun	S
2523	2021	3	13	3	Mus eller råtta	3	Uppsala län	381	Enköping kommun	S
2678	2021	7	19	3	Mus eller råtta	3	Uppsala län	381	Enköping kommun	S
2714	2021	9	23	3	Mus eller råtta	3	Uppsala län	381	Enköping kommun	S
2858	2021	10	23	3	Mus eller råtta	3	Uppsala län	381	Enköping kommun	S
2898	2021	10	30	3	Mus eller råtta	3	Uppsala län	381	Enköping kommun	S
3066	2021	11	19	3	Mus eller råtta	3	Uppsala län	381	Enköping kommun	S
3172	2021	12	5	3	Mus eller råtta	3	Uppsala län	381	Enköping kommun	S
3182	2021	12	9	3	Mus eller råtta	3	Uppsala län	381	Enköping kommun	S
3257	2021	12	27	3	Mus eller råtta	3	Uppsala län	381	Enköping kommun	S
3284	2022	1	6	3	Mus eller råtta	3	Uppsala län	381	Enköping kommun	S
3299	2022	1	12	3	Mus eller råtta	3	Uppsala län	381	Enköping kommun	S
3310	2022	1	15	3	Mus eller råtta	3	Uppsala län	381	Enköping kommun	S
3311	2022	1	16	3	Mus eller råtta	3	Uppsala län	381	Enköping kommun	S
3312	2022	1	16	3	Mus eller råtta	3	Uppsala län	381	Enköping kommun	S
3341	2022	1	29	3	Mus eller råtta	3	Uppsala län	381	Enköping kommun	S
3563	2022	9	23	3	Mus eller råtta	3	Uppsala län	381	Enköping kommun	S
3565	2022	9	24	3	Mus eller råtta	3	Uppsala län	381	Enköping kommun	S
3566	2022	9	24	3	Mus eller råtta	3	Uppsala län	381	Enköping kommun	S
3746	2022	12	7	3	Mus eller råtta	3	Uppsala län	381	Enköping kommun	S
3747	2022	12	7	2	Lämmel eller sork	3	Uppsala län	381	Enköping kommun	S
3755	2022	12	10	3	Mus eller råtta	3	Uppsala län	381	Enköping kommun	S
3765	2022	12	13	3	Mus eller råtta	3	Uppsala län	381	Enköping kommun	S
3772	2022	12	16	3	Mus eller råtta	3	Uppsala län	381	Enköping kommun	S
3778	2022	12	18	3	Mus eller råtta	3	Uppsala län	381	Enköping kommun	S
3861	2023	2	18	3	Mus eller råtta	3	Uppsala län	381	Enköping kommun	S
3863	2023	3	4	3	Mus eller råtta	3	Uppsala län	381	Enköping kommun	S
3883	2023	5	27	3	Mus eller råtta	3	Uppsala län	381	Enköping kommun	S
4202	2024	12	12	3	Mus eller råtta	3	Uppsala län	381	Enköping kommun	S
4203	2024	12	12	3	Mus eller råtta	3	Uppsala län	381	Enköping kommun	S
4601	2025	2	5	3	Mus eller råtta	4	Uppsala län	381	Enköping kommun	S
4805	2025	2	13	3	Mus eller råtta	4	Uppsala län	381	Enköping kommun	S
4830	2025	2	13	3	Mus eller råtta	3	Uppsala län	381	Enköping kommun	S
4883	2025	2	14	3	Mus eller råtta	3	Uppsala län	381	Enköping kommun	S
4892	2025	2	14	3	Mus eller råtta	3	Uppsala län	381	Enköping kommun	S
4929	2025	2	15	3	Mus eller råtta	3	Uppsala län	381	Enköping kommun	S
4955	2025	2	15	3	Mus eller råtta	3	Uppsala län	381	Enköping kommun	S
5143	2025	2	16	3	Mus eller råtta	3	Uppsala län	381	Enköping kommun	S
5309	2025	2	22	3	Mus eller råtta	4	Uppsala län	381	Enköping kommun	S
336	2020	11	9	3	Mus eller råtta	4	Södermanlands län	484	Eskilstuna kommun	S
466	2020	11	11	3	Mus eller råtta	4	Södermanlands län	484	Eskilstuna kommun	S
545	2020	11	12	3	Mus eller råtta	4	Södermanlands län	484	Eskilstuna kommun	S
916	2020	11	19	3	Mus eller råtta	4	Södermanlands län	484	Eskilstuna kommun	S
944	2020	11	19	3	Mus eller råtta	4	Södermanlands län	484	Eskilstuna kommun	S
1148	2020	11	22	3	Mus eller råtta	4	Södermanlands län	484	Eskilstuna kommun	S
1478	2020	11	30	3	Mus eller råtta	4	Södermanlands län	484	Eskilstuna kommun	S
1504	2020	12	1	3	Mus eller råtta	4	Södermanlands län	484	Eskilstuna kommun	S
1514	2020	12	2	3	Mus eller råtta	4	Södermanlands län	484	Eskilstuna kommun	S
1558	2020	12	4	3	Mus eller råtta	4	Södermanlands län	484	Eskilstuna kommun	S
1559	2020	12	4	3	Mus eller råtta	4	Södermanlands län	484	Eskilstuna kommun	S
1565	2020	12	4	3	Mus eller råtta	4	Södermanlands län	484	Eskilstuna kommun	S
1605	2020	12	5	3	Mus eller råtta	4	Södermanlands län	484	Eskilstuna kommun	S
1620	2020	12	6	3	Mus eller råtta	4	Södermanlands län	484	Eskilstuna kommun	S
1649	2020	12	7	3	Mus eller råtta	4	Södermanlands län	484	Eskilstuna kommun	S
1665	2020	12	8	3	Mus eller råtta	4	Södermanlands län	484	Eskilstuna kommun	S
2000	2021	1	2	3	Mus eller råtta	4	Södermanlands län	484	Eskilstuna kommun	S
2001	2021	1	2	3	Mus eller råtta	4	Södermanlands län	484	Eskilstuna kommun	S
2249	2021	1	31	3	Mus eller råtta	4	Södermanlands län	484	Eskilstuna kommun	S
2284	2021	2	4	3	Mus eller råtta	4	Södermanlands län	484	Eskilstuna kommun	S
3554	2022	9	18	3	Mus eller råtta	4	Södermanlands län	484	Eskilstuna kommun	S
3561	2022	9	22	3	Mus eller råtta	4	Södermanlands län	484	Eskilstuna kommun	S
4147	2024	11	7	3	Mus eller råtta	4	Södermanlands län	484	Eskilstuna kommun	S
4150	2024	11	9	3	Mus eller råtta	4	Södermanlands län	484	Eskilstuna kommun	S
4158	2024	11	13	3	Mus eller råtta	4	Södermanlands län	484	Eskilstuna kommun	S
4167	2024	11	18	3	Mus eller råtta	4	Södermanlands län	484	Eskilstuna kommun	S
4243	2025	1	5	3	Mus eller råtta	4	Södermanlands län	484	Eskilstuna kommun	S
4305	2025	1	16	3	Mus eller råtta	4	Södermanlands län	484	Eskilstuna kommun	S
4379	2025	1	25	3	Mus eller råtta	4	Södermanlands län	484	Eskilstuna kommun	S
4496	2025	2	1	3	Mus eller råtta	4	Södermanlands län	484	Eskilstuna kommun	S
4615	2025	2	5	3	Mus eller råtta	4	Södermanlands län	484	Eskilstuna kommun	S
4720	2025	2	9	3	Mus eller råtta	4	Södermanlands län	484	Eskilstuna kommun	S
4765	2025	2	11	3	Mus eller råtta	4	Södermanlands län	484	Eskilstuna kommun	S
4810	2025	2	13	3	Mus eller råtta	4	Södermanlands län	484	Eskilstuna kommun	S
4821	2025	2	13	3	Mus eller råtta	4	Södermanlands län	484	Eskilstuna kommun	S
4833	2025	2	14	3	Mus eller råtta	4	Södermanlands län	484	Eskilstuna kommun	S
4886	2025	2	14	3	Mus eller råtta	4	Södermanlands län	484	Eskilstuna kommun	S
4965	2025	2	15	3	Mus eller råtta	4	Södermanlands län	484	Eskilstuna kommun	S
4968	2025	2	15	3	Mus eller råtta	4	Södermanlands län	484	Eskilstuna kommun	S
4977	2025	2	15	19353	Brunråtta	4	Södermanlands län	484	Eskilstuna kommun	S
4990	2025	2	16	3	Mus eller råtta	4	Södermanlands län	484	Eskilstuna kommun	S
4994	2025	2	16	3	Mus eller råtta	4	Södermanlands län	484	Eskilstuna kommun	S
5075	2025	2	16	3	Mus eller råtta	4	Södermanlands län	484	Eskilstuna kommun	S
5332	2025	2	23	3	Mus eller råtta	4	Södermanlands län	484	Eskilstuna kommun	S
5435	2025	3	1	3	Mus eller råtta	4	Södermanlands län	484	Eskilstuna kommun	S
197	2020	11	3	3	Mus eller råtta	12	Skåne län	1285	Eslöv kommun	S
494	2020	11	12	3	Mus eller råtta	12	Skåne län	1285	Eslöv kommun	S
673	2020	11	15	3	Mus eller råtta	12	Skåne län	1285	Eslöv kommun	S
744	2020	11	16	3	Mus eller råtta	12	Skåne län	1285	Eslöv kommun	S
806	2020	11	17	3	Mus eller råtta	12	Skåne län	1285	Eslöv kommun	S
1236	2020	11	24	3	Mus eller råtta	12	Skåne län	1285	Eslöv kommun	S
1483	2020	12	1	3	Mus eller råtta	12	Skåne län	1285	Eslöv kommun	S
1532	2020	12	3	3	Mus eller råtta	12	Skåne län	1285	Eslöv kommun	S
1808	2020	12	16	3	Mus eller råtta	12	Skåne län	1285	Eslöv kommun	S
2361	2021	2	14	3	Mus eller råtta	12	Skåne län	1285	Eslöv kommun	S
4645	2025	2	6	3	Mus eller råtta	12	Skåne län	1285	Eslöv kommun	S
5151	2025	2	16	3	Mus eller råtta	12	Skåne län	1285	Eslöv kommun	S
5293	2025	2	21	3	Mus eller råtta	12	Skåne län	1285	Eslöv kommun	S
5328	2025	2	23	3	Mus eller råtta	12	Skåne län	1285	Eslöv kommun	S
5597	2025	3	15	3	Mus eller råtta	14	Västra Götalands län	1445	Essunga kommun	S
228	2020	11	6	3	Mus eller råtta	13	Hallands län	1382	Falkenberg kommun	S
511	2020	11	12	3	Mus eller råtta	13	Hallands län	1382	Falkenberg kommun	S
636	2020	11	14	3	Mus eller råtta	13	Hallands län	1382	Falkenberg kommun	S
733	2020	11	15	1904	Mindre skogsmus	13	Hallands län	1382	Falkenberg kommun	S
800	2020	11	16	3	Mus eller råtta	13	Hallands län	1382	Falkenberg kommun	S
841	2020	11	17	1904	Mindre skogsmus	13	Hallands län	1382	Falkenberg kommun	S
1066	2020	11	21	1904	Mindre skogsmus	13	Hallands län	1382	Falkenberg kommun	S
1238	2020	11	24	3	Mus eller råtta	13	Hallands län	1382	Falkenberg kommun	S
1445	2020	11	29	3	Mus eller råtta	13	Hallands län	1382	Falkenberg kommun	S
1495	2020	12	1	1904	Mindre skogsmus	13	Hallands län	1382	Falkenberg kommun	S
1567	2020	12	4	1904	Mindre skogsmus	13	Hallands län	1382	Falkenberg kommun	S
3360	2022	2	12	3	Mus eller råtta	13	Hallands län	1382	Falkenberg kommun	S
4310	2025	1	16	2	Lämmel eller sork	13	Hallands län	1382	Falkenberg kommun	S
4321	2025	1	17	3	Mus eller råtta	13	Hallands län	1382	Falkenberg kommun	S
4402	2025	1	27	2	Lämmel eller sork	13	Hallands län	1382	Falkenberg kommun	S
4492	2025	2	1	4973	Skogssork	13	Hallands län	1382	Falkenberg kommun	S
4520	2025	2	1	3	Mus eller råtta	13	Hallands län	1382	Falkenberg kommun	S
4638	2025	2	6	4973	Skogssork	13	Hallands län	1382	Falkenberg kommun	S
4794	2025	2	12	3	Mus eller råtta	13	Hallands län	1382	Falkenberg kommun	S
5236	2025	2	18	3	Mus eller råtta	13	Hallands län	1382	Falkenberg kommun	S
5280	2025	2	21	3	Mus eller råtta	13	Hallands län	1382	Falkenberg kommun	S
5321	2025	2	23	3	Mus eller råtta	13	Hallands län	1382	Falkenberg kommun	S
5371	2025	2	25	3	Mus eller råtta	13	Hallands län	1382	Falkenberg kommun	S
5383	2025	2	25	3	Mus eller råtta	13	Hallands län	1382	Falkenberg kommun	S
230	2020	11	6	3	Mus eller råtta	14	Västra Götalands län	1499	Falköping kommun	S
231	2020	11	6	3	Mus eller råtta	14	Västra Götalands län	1499	Falköping kommun	S
597	2020	11	14	3	Mus eller råtta	14	Västra Götalands län	1499	Falköping kommun	S
598	2020	11	14	3	Mus eller råtta	14	Västra Götalands län	1499	Falköping kommun	S
607	2020	11	14	3	Mus eller råtta	14	Västra Götalands län	1499	Falköping kommun	S
609	2020	11	14	3	Mus eller råtta	14	Västra Götalands län	1499	Falköping kommun	S
619	2020	11	14	3	Mus eller råtta	14	Västra Götalands län	1499	Falköping kommun	S
627	2020	11	14	3	Mus eller råtta	14	Västra Götalands län	1499	Falköping kommun	S
818	2020	11	17	3	Mus eller råtta	14	Västra Götalands län	1499	Falköping kommun	S
977	2020	11	19	3	Mus eller råtta	14	Västra Götalands län	1499	Falköping kommun	S
1009	2020	11	20	3	Mus eller råtta	14	Västra Götalands län	1499	Falköping kommun	S
1031	2020	11	20	3	Mus eller råtta	14	Västra Götalands län	1499	Falköping kommun	S
1142	2020	11	22	13972	Husmus	14	Västra Götalands län	1499	Falköping kommun	S
1188	2020	11	23	3	Mus eller råtta	14	Västra Götalands län	1499	Falköping kommun	S
1189	2020	11	23	3	Mus eller råtta	14	Västra Götalands län	1499	Falköping kommun	S
1220	2020	11	23	3	Mus eller råtta	14	Västra Götalands län	1499	Falköping kommun	S
1290	2020	11	25	3	Mus eller råtta	14	Västra Götalands län	1499	Falköping kommun	S
1291	2020	11	25	3	Mus eller råtta	14	Västra Götalands län	1499	Falköping kommun	S
1360	2020	11	26	3	Mus eller råtta	14	Västra Götalands län	1499	Falköping kommun	S
1384	2020	11	27	3	Mus eller råtta	14	Västra Götalands län	1499	Falköping kommun	S
1386	2020	11	27	3	Mus eller råtta	14	Västra Götalands län	1499	Falköping kommun	S
1388	2020	11	27	3	Mus eller råtta	14	Västra Götalands län	1499	Falköping kommun	S
1391	2020	11	27	3	Mus eller råtta	14	Västra Götalands län	1499	Falköping kommun	S
1467	2020	11	30	13972	Husmus	14	Västra Götalands län	1499	Falköping kommun	S
1718	2020	12	10	3	Mus eller råtta	14	Västra Götalands län	1499	Falköping kommun	S
1772	2020	12	13	1892	Större skogsmus	14	Västra Götalands län	1499	Falköping kommun	S
1787	2020	12	14	3	Mus eller råtta	14	Västra Götalands län	1499	Falköping kommun	S
1895	2020	12	19	3	Mus eller råtta	14	Västra Götalands län	1499	Falköping kommun	S
1923	2020	12	22	3	Mus eller råtta	14	Västra Götalands län	1499	Falköping kommun	S
1926	2020	12	22	3	Mus eller råtta	14	Västra Götalands län	1499	Falköping kommun	S
2004	2021	1	2	3	Mus eller råtta	14	Västra Götalands län	1499	Falköping kommun	S
2006	2021	1	2	3	Mus eller råtta	14	Västra Götalands län	1499	Falköping kommun	S
2026	2021	1	6	3	Mus eller råtta	14	Västra Götalands län	1499	Falköping kommun	S
2590	2021	3	31	3	Mus eller råtta	14	Västra Götalands län	1499	Falköping kommun	S
2591	2021	3	31	3	Mus eller råtta	14	Västra Götalands län	1499	Falköping kommun	S
2781	2021	10	11	3	Mus eller råtta	14	Västra Götalands län	1499	Falköping kommun	S
2946	2021	11	5	3	Mus eller råtta	14	Västra Götalands län	1499	Falköping kommun	S
2947	2021	11	5	3	Mus eller råtta	14	Västra Götalands län	1499	Falköping kommun	S
2950	2021	11	5	3	Mus eller råtta	14	Västra Götalands län	1499	Falköping kommun	S
2953	2021	11	5	3	Mus eller råtta	14	Västra Götalands län	1499	Falköping kommun	S
2954	2021	11	5	3	Mus eller råtta	14	Västra Götalands län	1499	Falköping kommun	S
2955	2021	11	5	3	Mus eller råtta	14	Västra Götalands län	1499	Falköping kommun	S
2959	2021	11	5	3	Mus eller råtta	14	Västra Götalands län	1499	Falköping kommun	S
2960	2021	11	5	3	Mus eller råtta	14	Västra Götalands län	1499	Falköping kommun	S
4291	2025	1	15	3	Mus eller råtta	14	Västra Götalands län	1499	Falköping kommun	S
4976	2025	2	15	3	Mus eller råtta	14	Västra Götalands län	1499	Falköping kommun	S
106	2020	10	17	3	Mus eller råtta	20	Dalarnas län	2080	Falun kommun	N
122	2020	10	22	4	Näbbmus	20	Dalarnas län	2080	Falun kommun	N
232	2020	11	6	3	Mus eller råtta	20	Dalarnas län	2080	Falun kommun	N
233	2020	11	6	3	Mus eller råtta	20	Dalarnas län	2080	Falun kommun	N
234	2020	11	6	3	Mus eller råtta	20	Dalarnas län	2080	Falun kommun	N
235	2020	11	6	3	Mus eller råtta	20	Dalarnas län	2080	Falun kommun	N
236	2020	11	6	3	Mus eller råtta	20	Dalarnas län	2080	Falun kommun	N
237	2020	11	6	3	Mus eller råtta	20	Dalarnas län	2080	Falun kommun	N
238	2020	11	6	3	Mus eller råtta	20	Dalarnas län	2080	Falun kommun	N
860	2020	11	17	3	Mus eller råtta	20	Dalarnas län	2080	Falun kommun	N
881	2020	11	18	4	Näbbmus	20	Dalarnas län	2080	Falun kommun	N
1137	2020	11	22	3	Mus eller råtta	20	Dalarnas län	2080	Falun kommun	N
1470	2020	11	30	3	Mus eller råtta	20	Dalarnas län	2080	Falun kommun	N
1883	2020	12	19	3	Mus eller råtta	20	Dalarnas län	2080	Falun kommun	N
1884	2020	12	19	3	Mus eller råtta	20	Dalarnas län	2080	Falun kommun	N
1885	2020	12	19	3	Mus eller råtta	20	Dalarnas län	2080	Falun kommun	N
1886	2020	12	19	3	Mus eller råtta	20	Dalarnas län	2080	Falun kommun	N
1887	2020	12	19	3	Mus eller råtta	20	Dalarnas län	2080	Falun kommun	N
1888	2020	12	19	3	Mus eller råtta	20	Dalarnas län	2080	Falun kommun	N
1889	2020	12	19	3	Mus eller råtta	20	Dalarnas län	2080	Falun kommun	N
1938	2020	12	25	3	Mus eller råtta	20	Dalarnas län	2080	Falun kommun	N
1969	2020	12	28	2149	Vattensork	20	Dalarnas län	2080	Falun kommun	N
2320	2021	2	9	3	Mus eller råtta	20	Dalarnas län	2080	Falun kommun	N
2330	2021	2	10	3	Mus eller råtta	20	Dalarnas län	2080	Falun kommun	N
2395	2021	2	17	3	Mus eller råtta	20	Dalarnas län	2080	Falun kommun	N
2398	2021	2	17	3	Mus eller råtta	20	Dalarnas län	2080	Falun kommun	N
2400	2021	2	18	2	Lämmel eller sork	20	Dalarnas län	2080	Falun kommun	N
2403	2021	2	18	2	Lämmel eller sork	20	Dalarnas län	2080	Falun kommun	N
2413	2021	2	21	3	Mus eller råtta	20	Dalarnas län	2080	Falun kommun	N
2780	2021	10	11	3	Mus eller råtta	20	Dalarnas län	2080	Falun kommun	N
3287	2022	1	7	3	Mus eller råtta	20	Dalarnas län	2080	Falun kommun	N
3297	2022	1	11	3	Mus eller råtta	20	Dalarnas län	2080	Falun kommun	N
3301	2022	1	12	3	Mus eller råtta	20	Dalarnas län	2080	Falun kommun	N
4311	2025	1	16	3	Mus eller råtta	20	Dalarnas län	2080	Falun kommun	N
4517	2025	2	1	4	Näbbmus	20	Dalarnas län	2080	Falun kommun	N
4585	2025	2	4	3	Mus eller råtta	20	Dalarnas län	2080	Falun kommun	N
4957	2025	2	15	3	Mus eller råtta	20	Dalarnas län	2080	Falun kommun	N
5416	2025	2	28	3	Mus eller råtta	20	Dalarnas län	2080	Falun kommun	N
5582	2025	3	14	3	Mus eller råtta	20	Dalarnas län	2080	Falun kommun	N
5585	2025	3	14	3	Mus eller råtta	20	Dalarnas län	2080	Falun kommun	N
539	2020	11	12	3	Mus eller råtta	14	Västra Götalands län	1439	Färgelanda kommun	S
583	2020	11	13	3	Mus eller råtta	14	Västra Götalands län	1439	Färgelanda kommun	S
799	2020	11	16	3	Mus eller råtta	14	Västra Götalands län	1439	Färgelanda kommun	S
2010	2021	1	3	3	Mus eller råtta	14	Västra Götalands län	1439	Färgelanda kommun	S
2206	2021	1	27	3	Mus eller råtta	14	Västra Götalands län	1439	Färgelanda kommun	S
2226	2021	1	29	3	Mus eller råtta	14	Västra Götalands län	1439	Färgelanda kommun	S
4590	2025	2	4	3	Mus eller råtta	14	Västra Götalands län	1439	Färgelanda kommun	S
4627	2025	2	5	3	Mus eller råtta	14	Västra Götalands län	1439	Färgelanda kommun	S
368	2020	11	10	3	Mus eller råtta	17	Värmlands län	1782	Filipstad kommun	N
369	2020	11	10	3	Mus eller råtta	17	Värmlands län	1782	Filipstad kommun	N
683	2020	11	15	3	Mus eller råtta	17	Värmlands län	1782	Filipstad kommun	N
764	2020	11	16	3	Mus eller råtta	17	Värmlands län	1782	Filipstad kommun	N
815	2020	11	17	3	Mus eller råtta	17	Värmlands län	1782	Filipstad kommun	N
882	2020	11	18	3	Mus eller råtta	17	Värmlands län	1782	Filipstad kommun	N
940	2020	11	19	3	Mus eller råtta	17	Värmlands län	1782	Filipstad kommun	N
1007	2020	11	20	3	Mus eller råtta	17	Värmlands län	1782	Filipstad kommun	N
4989	2025	2	16	3	Mus eller råtta	17	Värmlands län	1782	Filipstad kommun	N
5137	2025	2	16	3	Mus eller råtta	17	Värmlands län	1782	Filipstad kommun	N
1666	2020	12	8	3	Mus eller råtta	5	Östergötlands län	562	Finspång kommun	S
2375	2021	2	15	3	Mus eller råtta	5	Östergötlands län	562	Finspång kommun	S
2671	2021	6	28	3	Mus eller råtta	5	Östergötlands län	562	Finspång kommun	S
2672	2021	7	4	3	Mus eller råtta	5	Östergötlands län	562	Finspång kommun	S
4280	2025	1	12	3	Mus eller råtta	5	Östergötlands län	562	Finspång kommun	S
4281	2025	1	12	3	Mus eller råtta	5	Östergötlands län	562	Finspång kommun	S
5008	2025	2	16	3	Mus eller råtta	5	Östergötlands län	562	Finspång kommun	S
5061	2025	2	16	1904	Mindre skogsmus	5	Östergötlands län	562	Finspång kommun	S
5471	2025	3	2	1	Okänd	5	Östergötlands län	562	Finspång kommun	S
198	2020	11	4	1892	Större skogsmus	4	Södermanlands län	482	Flen kommun	S
729	2020	11	15	3	Mus eller råtta	4	Södermanlands län	482	Flen kommun	S
743	2020	11	16	1892	Större skogsmus	4	Södermanlands län	482	Flen kommun	S
1101	2020	11	22	13972	Husmus	4	Södermanlands län	482	Flen kommun	S
1427	2020	11	29	1892	Större skogsmus	4	Södermanlands län	482	Flen kommun	S
1568	2020	12	4	3	Mus eller råtta	4	Södermanlands län	482	Flen kommun	S
1569	2020	12	4	3	Mus eller råtta	4	Södermanlands län	482	Flen kommun	S
1637	2020	12	6	3	Mus eller råtta	4	Södermanlands län	482	Flen kommun	S
1639	2020	12	6	3	Mus eller råtta	4	Södermanlands län	482	Flen kommun	S
1814	2020	12	16	3	Mus eller råtta	4	Södermanlands län	482	Flen kommun	S
1818	2020	12	16	3	Mus eller råtta	4	Södermanlands län	482	Flen kommun	S
1848	2020	12	18	3	Mus eller råtta	4	Södermanlands län	482	Flen kommun	S
1914	2020	12	21	3	Mus eller råtta	4	Södermanlands län	482	Flen kommun	S
1964	2020	12	28	3	Mus eller råtta	4	Södermanlands län	482	Flen kommun	S
2980	2021	11	7	3	Mus eller råtta	4	Södermanlands län	482	Flen kommun	S
3214	2021	12	14	3	Mus eller råtta	4	Södermanlands län	482	Flen kommun	S
3219	2021	12	16	3	Mus eller råtta	4	Södermanlands län	482	Flen kommun	S
3282	2022	1	5	3	Mus eller råtta	4	Södermanlands län	482	Flen kommun	S
3283	2022	1	6	3	Mus eller råtta	4	Södermanlands län	482	Flen kommun	S
3356	2022	2	10	3	Mus eller råtta	4	Södermanlands län	482	Flen kommun	S
3357	2022	2	10	3	Mus eller råtta	4	Södermanlands län	482	Flen kommun	S
3366	2022	2	15	3	Mus eller råtta	4	Södermanlands län	482	Flen kommun	S
3457	2022	3	27	3	Mus eller råtta	4	Södermanlands län	482	Flen kommun	S
3570	2022	9	26	3	Mus eller råtta	4	Södermanlands län	482	Flen kommun	S
3572	2022	9	27	3	Mus eller råtta	4	Södermanlands län	482	Flen kommun	S
3577	2022	9	29	3	Mus eller råtta	4	Södermanlands län	482	Flen kommun	S
3579	2022	9	30	3	Mus eller råtta	4	Södermanlands län	482	Flen kommun	S
3583	2022	10	3	3	Mus eller råtta	4	Södermanlands län	482	Flen kommun	S
3593	2022	10	12	3	Mus eller råtta	4	Södermanlands län	482	Flen kommun	S
3603	2022	10	18	3	Mus eller råtta	4	Södermanlands län	482	Flen kommun	S
3606	2022	10	19	3	Mus eller råtta	4	Södermanlands län	482	Flen kommun	S
3644	2022	11	6	3	Mus eller råtta	4	Södermanlands län	482	Flen kommun	S
3660	2022	11	9	3	Mus eller råtta	4	Södermanlands län	482	Flen kommun	S
3666	2022	11	13	3	Mus eller råtta	4	Södermanlands län	482	Flen kommun	S
3673	2022	11	14	3	Mus eller råtta	4	Södermanlands län	482	Flen kommun	S
3699	2022	11	26	3	Mus eller råtta	4	Södermanlands län	482	Flen kommun	S
3739	2022	12	6	3	Mus eller råtta	4	Södermanlands län	482	Flen kommun	S
3771	2022	12	16	3	Mus eller råtta	4	Södermanlands län	482	Flen kommun	S
3795	2022	12	29	3	Mus eller råtta	4	Södermanlands län	482	Flen kommun	S
3828	2023	1	15	3	Mus eller råtta	4	Södermanlands län	482	Flen kommun	S
4262	2025	1	9	3	Mus eller råtta	4	Södermanlands län	482	Flen kommun	S
4698	2025	2	8	3	Mus eller råtta	4	Södermanlands län	482	Flen kommun	S
5005	2025	2	16	4	Näbbmus	4	Södermanlands län	482	Flen kommun	S
1241	2020	11	24	3	Mus eller råtta	17	Värmlands län	1763	Forshaga kommun	N
4286	2025	1	14	3	Mus eller råtta	17	Värmlands län	1763	Forshaga kommun	N
4448	2025	1	30	4	Näbbmus	17	Värmlands län	1763	Forshaga kommun	N
3727	2022	12	2	3	Mus eller råtta	20	Dalarnas län	2026	Gagnef kommun	N
4255	2025	1	8	3	Mus eller råtta	20	Dalarnas län	2026	Gagnef kommun	N
4773	2025	2	11	3	Mus eller råtta	20	Dalarnas län	2026	Gagnef kommun	N
22	2020	9	21	4	Näbbmus	25	Norrbottens län	2523	Gällivare kommun	N
1063	2020	11	21	2	Lämmel eller sork	25	Norrbottens län	2523	Gällivare kommun	N
1304	2020	11	25	1	Okänd	25	Norrbottens län	2523	Gällivare kommun	N
1408	2020	11	28	2	Lämmel eller sork	25	Norrbottens län	2523	Gällivare kommun	N
1542	2020	12	3	1	Okänd	25	Norrbottens län	2523	Gällivare kommun	N
162	2020	10	31	3	Mus eller råtta	21	Gävleborgs län	2180	Gävle kommun	N
300	2020	11	8	3	Mus eller råtta	21	Gävleborgs län	2180	Gävle kommun	N
302	2020	11	8	3	Mus eller råtta	21	Gävleborgs län	2180	Gävle kommun	N
432	2020	11	11	3	Mus eller råtta	21	Gävleborgs län	2180	Gävle kommun	N
433	2020	11	11	3	Mus eller råtta	21	Gävleborgs län	2180	Gävle kommun	N
434	2020	11	11	3	Mus eller råtta	21	Gävleborgs län	2180	Gävle kommun	N
435	2020	11	11	3	Mus eller råtta	21	Gävleborgs län	2180	Gävle kommun	N
516	2020	11	12	3	Mus eller råtta	21	Gävleborgs län	2180	Gävle kommun	N
538	2020	11	12	3	Mus eller råtta	21	Gävleborgs län	2180	Gävle kommun	N
542	2020	11	12	3	Mus eller råtta	21	Gävleborgs län	2180	Gävle kommun	N
581	2020	11	13	3	Mus eller råtta	21	Gävleborgs län	2180	Gävle kommun	N
1929	2020	12	23	3	Mus eller råtta	21	Gävleborgs län	2180	Gävle kommun	N
2121	2021	1	19	3	Mus eller råtta	21	Gävleborgs län	2180	Gävle kommun	N
2126	2021	1	20	3	Mus eller råtta	21	Gävleborgs län	2180	Gävle kommun	N
2667	2021	6	18	3	Mus eller råtta	21	Gävleborgs län	2180	Gävle kommun	N
2696	2021	9	2	3	Mus eller råtta	21	Gävleborgs län	2180	Gävle kommun	N
2697	2021	9	3	3	Mus eller råtta	21	Gävleborgs län	2180	Gävle kommun	N
2698	2021	9	3	3	Mus eller råtta	21	Gävleborgs län	2180	Gävle kommun	N
2754	2021	10	3	3	Mus eller råtta	21	Gävleborgs län	2180	Gävle kommun	N
2756	2021	10	3	3	Mus eller råtta	21	Gävleborgs län	2180	Gävle kommun	N
3048	2021	11	15	3	Mus eller råtta	21	Gävleborgs län	2180	Gävle kommun	N
3231	2021	12	19	3	Mus eller råtta	21	Gävleborgs län	2180	Gävle kommun	N
3232	2021	12	19	3	Mus eller råtta	21	Gävleborgs län	2180	Gävle kommun	N
3233	2021	12	19	3	Mus eller råtta	21	Gävleborgs län	2180	Gävle kommun	N
3235	2021	12	19	3	Mus eller råtta	21	Gävleborgs län	2180	Gävle kommun	N
3239	2021	12	19	3	Mus eller råtta	21	Gävleborgs län	2180	Gävle kommun	N
3589	2022	10	9	1	Okänd	21	Gävleborgs län	2180	Gävle kommun	N
4293	2025	1	15	3	Mus eller råtta	21	Gävleborgs län	2180	Gävle kommun	N
4332	2025	1	19	3	Mus eller råtta	21	Gävleborgs län	2180	Gävle kommun	N
4592	2025	2	4	3	Mus eller råtta	21	Gävleborgs län	2180	Gävle kommun	N
4642	2025	2	6	3	Mus eller råtta	21	Gävleborgs län	2180	Gävle kommun	N
4723	2025	2	9	3	Mus eller råtta	21	Gävleborgs län	2180	Gävle kommun	N
4882	2025	2	14	3	Mus eller råtta	21	Gävleborgs län	2180	Gävle kommun	N
4984	2025	2	15	3	Mus eller råtta	21	Gävleborgs län	2180	Gävle kommun	N
5128	2025	2	16	13972	Husmus	21	Gävleborgs län	2180	Gävle kommun	N
5477	2025	3	3	3	Mus eller råtta	21	Gävleborgs län	2180	Gävle kommun	N
464	2020	11	11	3	Mus eller råtta	6	Jönköpings län	662	Gislaved kommun	S
1369	2020	11	26	3	Mus eller råtta	6	Jönköpings län	662	Gislaved kommun	S
1420	2020	11	28	1904	Mindre skogsmus	6	Jönköpings län	662	Gislaved kommun	S
1442	2020	11	29	3	Mus eller råtta	6	Jönköpings län	662	Gislaved kommun	S
1573	2020	12	4	1904	Mindre skogsmus	6	Jönköpings län	662	Gislaved kommun	S
1577	2020	12	4	1904	Mindre skogsmus	6	Jönköpings län	662	Gislaved kommun	S
2179	2021	1	27	1904	Mindre skogsmus	6	Jönköpings län	662	Gislaved kommun	S
2494	2021	3	7	3	Mus eller råtta	6	Jönköpings län	662	Gislaved kommun	S
3158	2021	12	2	3	Mus eller råtta	6	Jönköpings län	662	Gislaved kommun	S
3481	2022	4	21	3	Mus eller råtta	6	Jönköpings län	662	Gislaved kommun	S
4552	2025	2	3	3	Mus eller råtta	6	Jönköpings län	662	Gislaved kommun	S
4574	2025	2	4	3	Mus eller råtta	6	Jönköpings län	662	Gislaved kommun	S
4605	2025	2	5	3	Mus eller råtta	6	Jönköpings län	662	Gislaved kommun	S
212	2020	11	5	13972	Husmus	4	Södermanlands län	461	Gnesta kommun	S
1100	2020	11	22	13972	Husmus	4	Södermanlands län	461	Gnesta kommun	S
1587	2020	12	5	13972	Husmus	4	Södermanlands län	461	Gnesta kommun	S
1704	2020	12	10	3	Mus eller råtta	4	Södermanlands län	461	Gnesta kommun	S
1805	2020	12	16	3	Mus eller råtta	4	Södermanlands län	461	Gnesta kommun	S
4252	2025	1	7	3	Mus eller råtta	4	Södermanlands län	461	Gnesta kommun	S
4920	2025	2	15	3	Mus eller råtta	4	Södermanlands län	461	Gnesta kommun	S
5049	2025	2	16	4	Näbbmus	4	Södermanlands län	461	Gnesta kommun	S
5253	2025	2	19	3	Mus eller råtta	4	Södermanlands län	461	Gnesta kommun	S
5405	2025	2	27	3	Mus eller råtta	4	Södermanlands län	461	Gnesta kommun	S
5533	2025	3	8	3	Mus eller råtta	4	Södermanlands län	461	Gnesta kommun	S
5668	2025	3	29	3	Mus eller råtta	4	Södermanlands län	461	Gnesta kommun	S
5819	2025	4	3	3	Mus eller råtta	4	Södermanlands län	461	Gnesta kommun	S
5820	2025	4	3	3	Mus eller råtta	4	Södermanlands län	461	Gnesta kommun	S
2146	2021	1	23	3	Mus eller råtta	6	Jönköpings län	617	Gnosjö kommun	S
2238	2021	1	30	3	Mus eller råtta	6	Jönköpings län	617	Gnosjö kommun	S
2298	2021	2	6	3	Mus eller råtta	6	Jönköpings län	617	Gnosjö kommun	S
2518	2021	3	13	3	Mus eller råtta	6	Jönköpings län	617	Gnosjö kommun	S
2554	2021	3	20	3	Mus eller råtta	6	Jönköpings län	617	Gnosjö kommun	S
2573	2021	3	27	3	Mus eller råtta	6	Jönköpings län	617	Gnosjö kommun	S
3090	2021	11	20	3	Mus eller råtta	6	Jönköpings län	617	Gnosjö kommun	S
3249	2021	12	23	3	Mus eller råtta	6	Jönköpings län	617	Gnosjö kommun	S
4621	2025	2	5	1892	Större skogsmus	6	Jönköpings län	617	Gnosjö kommun	S
4812	2025	2	13	3	Mus eller råtta	6	Jönköpings län	617	Gnosjö kommun	S
4831	2025	2	13	3	Mus eller råtta	6	Jönköpings län	617	Gnosjö kommun	S
5057	2025	2	16	3	Mus eller råtta	6	Jönköpings län	617	Gnosjö kommun	S
5234	2025	2	18	3	Mus eller råtta	6	Jönköpings län	617	Gnosjö kommun	S
299	2020	11	8	3	Mus eller råtta	14	Västra Götalands län	1480	Göteborg kommun	S
1471	2020	11	30	3	Mus eller råtta	14	Västra Götalands län	1480	Göteborg kommun	S
1524	2020	12	2	3	Mus eller råtta	14	Västra Götalands län	1480	Göteborg kommun	S
1591	2020	12	5	3	Mus eller råtta	14	Västra Götalands län	1480	Göteborg kommun	S
2507	2021	3	9	3	Mus eller råtta	14	Västra Götalands län	1480	Göteborg kommun	S
2508	2021	3	9	3	Mus eller råtta	14	Västra Götalands län	1480	Göteborg kommun	S
2585	2021	3	29	3	Mus eller råtta	14	Västra Götalands län	1480	Göteborg kommun	S
2625	2021	4	17	3	Mus eller råtta	14	Västra Götalands län	1480	Göteborg kommun	S
2686	2021	8	18	3	Mus eller råtta	14	Västra Götalands län	1480	Göteborg kommun	S
4001	2024	1	17	3	Mus eller råtta	14	Västra Götalands län	1480	Göteborg kommun	S
4301	2025	1	16	3	Mus eller råtta	14	Västra Götalands län	1480	Göteborg kommun	S
4376	2025	1	25	3	Mus eller råtta	14	Västra Götalands län	1480	Göteborg kommun	S
4499	2025	2	1	3	Mus eller råtta	14	Västra Götalands län	1480	Göteborg kommun	S
4522	2025	2	1	3	Mus eller råtta	14	Västra Götalands län	1480	Göteborg kommun	S
4582	2025	2	4	3	Mus eller råtta	14	Västra Götalands län	1480	Göteborg kommun	S
4646	2025	2	6	3	Mus eller råtta	14	Västra Götalands län	1480	Göteborg kommun	S
4677	2025	2	8	1	Okänd	14	Västra Götalands län	1480	Göteborg kommun	S
4760	2025	2	11	3	Mus eller råtta	14	Västra Götalands län	1480	Göteborg kommun	S
4762	2025	2	11	3	Mus eller råtta	14	Västra Götalands län	1480	Göteborg kommun	S
4791	2025	2	12	3	Mus eller råtta	14	Västra Götalands län	1480	Göteborg kommun	S
4826	2025	2	13	3	Mus eller råtta	14	Västra Götalands län	1480	Göteborg kommun	S
4898	2025	2	15	3	Mus eller råtta	14	Västra Götalands län	1480	Göteborg kommun	S
5050	2025	2	16	19353	Brunråtta	14	Västra Götalands län	1480	Göteborg kommun	S
5076	2025	2	16	3	Mus eller råtta	14	Västra Götalands län	1480	Göteborg kommun	S
5211	2025	2	18	3	Mus eller råtta	14	Västra Götalands län	1480	Göteborg kommun	S
5220	2025	2	18	3	Mus eller råtta	14	Västra Götalands län	1480	Göteborg kommun	S
5654	2025	3	27	3	Mus eller råtta	14	Västra Götalands län	1480	Göteborg kommun	S
5716	2025	4	25	3	Mus eller råtta	14	Västra Götalands län	1480	Göteborg kommun	S
5717	2025	4	25	3	Mus eller råtta	14	Västra Götalands län	1480	Göteborg kommun	S
5821	2025	4	2	3	Mus eller råtta	14	Västra Götalands län	1480	Göteborg kommun	S
5822	2025	4	2	3	Mus eller råtta	14	Västra Götalands län	1480	Göteborg kommun	S
527	2020	11	12	1892	Större skogsmus	14	Västra Götalands län	1471	Götene kommun	S
616	2020	11	14	3	Mus eller råtta	14	Västra Götalands län	1471	Götene kommun	S
701	2020	11	15	3	Mus eller råtta	14	Västra Götalands län	1471	Götene kommun	S
703	2020	11	15	3	Mus eller råtta	14	Västra Götalands län	1471	Götene kommun	S
722	2020	11	15	3	Mus eller råtta	14	Västra Götalands län	1471	Götene kommun	S
732	2020	11	15	3	Mus eller råtta	14	Västra Götalands län	1471	Götene kommun	S
790	2020	11	16	1892	Större skogsmus	14	Västra Götalands län	1471	Götene kommun	S
978	2020	11	19	1892	Större skogsmus	14	Västra Götalands län	1471	Götene kommun	S
1153	2020	11	22	3	Mus eller råtta	14	Västra Götalands län	1471	Götene kommun	S
1223	2020	11	23	1892	Större skogsmus	14	Västra Götalands län	1471	Götene kommun	S
1240	2020	11	24	3	Mus eller råtta	14	Västra Götalands län	1471	Götene kommun	S
2060	2021	1	11	1892	Större skogsmus	14	Västra Götalands län	1471	Götene kommun	S
2063	2021	1	11	3	Mus eller råtta	14	Västra Götalands län	1471	Götene kommun	S
2316	2021	2	9	3	Mus eller råtta	14	Västra Götalands län	1471	Götene kommun	S
2623	2021	4	17	3	Mus eller råtta	14	Västra Götalands län	1471	Götene kommun	S
4863	2025	2	14	3	Mus eller råtta	14	Västra Götalands län	1471	Götene kommun	S
5500	2025	3	5	4	Näbbmus	14	Västra Götalands län	1471	Götene kommun	S
57	2020	10	11	3	Mus eller råtta	9	Gotlands län	980	Gotland kommun	S
357	2020	11	10	13972	Husmus	9	Gotlands län	980	Gotland kommun	S
508	2020	11	12	3	Mus eller råtta	9	Gotlands län	980	Gotland kommun	S
585	2020	11	13	3	Mus eller råtta	9	Gotlands län	980	Gotland kommun	S
2005	2021	1	2	3	Mus eller råtta	9	Gotlands län	980	Gotland kommun	S
2353	2021	2	13	3	Mus eller råtta	9	Gotlands län	980	Gotland kommun	S
3499	2022	6	2	4	Näbbmus	9	Gotlands län	980	Gotland kommun	S
3823	2023	1	12	2	Lämmel eller sork	9	Gotlands län	980	Gotland kommun	S
3824	2023	1	12	2	Lämmel eller sork	9	Gotlands län	980	Gotland kommun	S
3827	2023	1	15	2	Lämmel eller sork	9	Gotlands län	980	Gotland kommun	S
3849	2023	1	30	3	Mus eller råtta	9	Gotlands län	980	Gotland kommun	S
3894	2023	8	19	3	Mus eller råtta	9	Gotlands län	980	Gotland kommun	S
4027	2024	3	7	3	Mus eller råtta	9	Gotlands län	980	Gotland kommun	S
4183	2024	11	29	3	Mus eller råtta	9	Gotlands län	980	Gotland kommun	S
4398	2025	1	27	3	Mus eller råtta	9	Gotlands län	980	Gotland kommun	S
4460	2025	1	31	3	Mus eller råtta	9	Gotlands län	980	Gotland kommun	S
4737	2025	2	10	2	Lämmel eller sork	9	Gotlands län	980	Gotland kommun	S
4759	2025	2	11	3	Mus eller råtta	9	Gotlands län	980	Gotland kommun	S
4779	2025	2	12	3	Mus eller råtta	9	Gotlands län	980	Gotland kommun	S
4784	2025	2	12	3	Mus eller råtta	9	Gotlands län	980	Gotland kommun	S
4899	2025	2	15	1892	Större skogsmus	9	Gotlands län	980	Gotland kommun	S
4907	2025	2	15	3	Mus eller råtta	9	Gotlands län	980	Gotland kommun	S
4950	2025	2	15	3	Mus eller råtta	9	Gotlands län	980	Gotland kommun	S
4981	2025	2	15	3	Mus eller råtta	9	Gotlands län	980	Gotland kommun	S
5059	2025	2	16	3	Mus eller råtta	9	Gotlands län	980	Gotland kommun	S
5525	2025	3	8	3	Mus eller råtta	9	Gotlands län	980	Gotland kommun	S
5607	2025	3	16	3	Mus eller råtta	9	Gotlands län	980	Gotland kommun	S
5786	2025	4	11	3	Mus eller råtta	9	Gotlands län	980	Gotland kommun	S
291	2020	11	8	3	Mus eller råtta	14	Västra Götalands län	1444	Grästorp kommun	S
321	2020	11	9	3	Mus eller råtta	14	Västra Götalands län	1444	Grästorp kommun	S
4970	2025	2	15	3	Mus eller råtta	14	Västra Götalands län	1444	Grästorp kommun	S
5532	2025	3	8	3	Mus eller råtta	14	Västra Götalands län	1444	Grästorp kommun	S
599	2020	11	14	3	Mus eller råtta	17	Värmlands län	1764	Grums kommun	N
600	2020	11	14	3	Mus eller råtta	17	Värmlands län	1764	Grums kommun	N
926	2020	11	19	3	Mus eller råtta	17	Värmlands län	1764	Grums kommun	N
4584	2025	2	4	3	Mus eller råtta	17	Värmlands län	1764	Grums kommun	N
5365	2025	2	25	3	Mus eller råtta	17	Värmlands län	1764	Grums kommun	N
869	2020	11	18	3	Mus eller råtta	14	Västra Götalands län	1447	Gullspång kommun	S
923	2020	11	19	3	Mus eller råtta	14	Västra Götalands län	1447	Gullspång kommun	S
995	2020	11	20	3	Mus eller råtta	14	Västra Götalands län	1447	Gullspång kommun	S
1185	2020	11	23	4	Näbbmus	14	Västra Götalands län	1447	Gullspång kommun	S
1289	2020	11	25	3	Mus eller råtta	14	Västra Götalands län	1447	Gullspång kommun	S
1831	2020	12	17	3	Mus eller råtta	14	Västra Götalands län	1447	Gullspång kommun	S
1847	2020	12	18	3	Mus eller råtta	14	Västra Götalands län	1447	Gullspång kommun	S
2158	2021	1	25	3	Mus eller råtta	14	Västra Götalands län	1447	Gullspång kommun	S
2218	2021	1	29	3	Mus eller råtta	14	Västra Götalands län	1447	Gullspång kommun	S
5157	2025	2	16	3	Mus eller råtta	14	Västra Götalands län	1447	Gullspång kommun	S
2315	2021	2	9	3	Mus eller råtta	6	Jönköpings län	643	Habo kommun	S
2483	2021	3	6	3	Mus eller råtta	6	Jönköpings län	643	Habo kommun	S
2509	2021	3	11	3	Mus eller råtta	6	Jönköpings län	643	Habo kommun	S
2513	2021	3	12	3	Mus eller råtta	6	Jönköpings län	643	Habo kommun	S
2516	2021	3	13	3	Mus eller råtta	6	Jönköpings län	643	Habo kommun	S
2525	2021	3	14	3	Mus eller råtta	6	Jönköpings län	643	Habo kommun	S
2527	2021	3	15	3	Mus eller råtta	6	Jönköpings län	643	Habo kommun	S
2533	2021	3	16	3	Mus eller råtta	6	Jönköpings län	643	Habo kommun	S
2541	2021	3	18	3	Mus eller råtta	6	Jönköpings län	643	Habo kommun	S
2544	2021	3	19	3	Mus eller råtta	6	Jönköpings län	643	Habo kommun	S
2564	2021	3	24	3	Mus eller råtta	6	Jönköpings län	643	Habo kommun	S
3476	2022	4	16	3	Mus eller råtta	6	Jönköpings län	643	Habo kommun	S
3710	2022	11	29	1	Okänd	6	Jönköpings län	643	Habo kommun	S
2300	2021	2	6	13972	Husmus	3	Uppsala län	305	Håbo kommun	S
4629	2025	2	5	3	Mus eller råtta	3	Uppsala län	305	Håbo kommun	S
5043	2025	2	16	3	Mus eller råtta	3	Uppsala län	305	Håbo kommun	S
2713	2021	9	22	3	Mus eller råtta	17	Värmlands län	1783	Hagfors kommun	N
4364	2025	1	24	3	Mus eller råtta	17	Värmlands län	1783	Hagfors kommun	N
5228	2025	2	18	3	Mus eller råtta	17	Värmlands län	1783	Hagfors kommun	N
1692	2020	12	9	1	Okänd	18	Örebro län	1863	Hällefors kommun	S
4900	2025	2	15	4	Näbbmus	18	Örebro län	1861	Hallsberg kommun	S
5023	2025	2	16	4	Näbbmus	18	Örebro län	1861	Hallsberg kommun	S
5572	2025	3	11	3	Mus eller råtta	18	Örebro län	1861	Hallsberg kommun	S
5673	2025	3	31	3	Mus eller råtta	18	Örebro län	1861	Hallsberg kommun	S
784	2020	11	16	3	Mus eller råtta	19	Västmanlands län	1961	Hallstahammar kommun	S
823	2020	11	17	3	Mus eller råtta	19	Västmanlands län	1961	Hallstahammar kommun	S
4859	2025	2	14	3	Mus eller råtta	19	Västmanlands län	1961	Hallstahammar kommun	S
4949	2025	2	15	3	Mus eller råtta	19	Västmanlands län	1961	Hallstahammar kommun	S
5183	2025	2	17	3	Mus eller råtta	19	Västmanlands län	1961	Hallstahammar kommun	S
5238	2025	2	18	3	Mus eller råtta	19	Västmanlands län	1961	Hallstahammar kommun	S
5262	2025	2	20	3	Mus eller råtta	19	Västmanlands län	1961	Hallstahammar kommun	S
5353	2025	2	24	3	Mus eller råtta	19	Västmanlands län	1961	Hallstahammar kommun	S
5356	2025	2	24	3	Mus eller råtta	19	Västmanlands län	1961	Hallstahammar kommun	S
5411	2025	2	28	3	Mus eller råtta	19	Västmanlands län	1961	Hallstahammar kommun	S
5412	2025	2	28	3	Mus eller råtta	19	Västmanlands län	1961	Hallstahammar kommun	S
5419	2025	2	28	3	Mus eller råtta	19	Västmanlands län	1961	Hallstahammar kommun	S
5423	2025	2	28	3	Mus eller råtta	19	Västmanlands län	1961	Hallstahammar kommun	S
5429	2025	3	1	3	Mus eller råtta	19	Västmanlands län	1961	Hallstahammar kommun	S
192	2020	11	3	3	Mus eller råtta	13	Hallands län	1380	Halmstad kommun	S
320	2020	11	9	3	Mus eller råtta	13	Hallands län	1380	Halmstad kommun	S
341	2020	11	9	3	Mus eller råtta	13	Hallands län	1380	Halmstad kommun	S
392	2020	11	10	3	Mus eller råtta	13	Hallands län	1380	Halmstad kommun	S
495	2020	11	12	3	Mus eller råtta	13	Hallands län	1380	Halmstad kommun	S
528	2020	11	12	3	Mus eller råtta	13	Hallands län	1380	Halmstad kommun	S
578	2020	11	13	3	Mus eller råtta	13	Hallands län	1380	Halmstad kommun	S
772	2020	11	16	3	Mus eller råtta	13	Hallands län	1380	Halmstad kommun	S
793	2020	11	16	3	Mus eller råtta	13	Hallands län	1380	Halmstad kommun	S
796	2020	11	16	3	Mus eller råtta	13	Hallands län	1380	Halmstad kommun	S
821	2020	11	17	3	Mus eller råtta	13	Hallands län	1380	Halmstad kommun	S
854	2020	11	17	3	Mus eller råtta	13	Hallands län	1380	Halmstad kommun	S
864	2020	11	17	3	Mus eller råtta	13	Hallands län	1380	Halmstad kommun	S
887	2020	11	18	3	Mus eller råtta	13	Hallands län	1380	Halmstad kommun	S
913	2020	11	18	3	Mus eller råtta	13	Hallands län	1380	Halmstad kommun	S
918	2020	11	19	3	Mus eller råtta	13	Hallands län	1380	Halmstad kommun	S
919	2020	11	19	3	Mus eller råtta	13	Hallands län	1380	Halmstad kommun	S
920	2020	11	19	3	Mus eller råtta	13	Hallands län	1380	Halmstad kommun	S
949	2020	11	19	3	Mus eller råtta	13	Hallands län	1380	Halmstad kommun	S
988	2020	11	20	3	Mus eller råtta	13	Hallands län	1380	Halmstad kommun	S
989	2020	11	20	3	Mus eller råtta	13	Hallands län	1380	Halmstad kommun	S
990	2020	11	20	3	Mus eller råtta	13	Hallands län	1380	Halmstad kommun	S
991	2020	11	20	3	Mus eller råtta	13	Hallands län	1380	Halmstad kommun	S
1034	2020	11	20	3	Mus eller råtta	13	Hallands län	1380	Halmstad kommun	S
1043	2020	11	21	3	Mus eller råtta	13	Hallands län	1380	Halmstad kommun	S
1044	2020	11	21	3	Mus eller råtta	13	Hallands län	1380	Halmstad kommun	S
1076	2020	11	21	3	Mus eller råtta	13	Hallands län	1380	Halmstad kommun	S
1109	2020	11	22	3	Mus eller råtta	13	Hallands län	1380	Halmstad kommun	S
1146	2020	11	22	3	Mus eller råtta	13	Hallands län	1380	Halmstad kommun	S
1180	2020	11	23	3	Mus eller råtta	13	Hallands län	1380	Halmstad kommun	S
1181	2020	11	23	3	Mus eller råtta	13	Hallands län	1380	Halmstad kommun	S
1182	2020	11	23	3	Mus eller råtta	13	Hallands län	1380	Halmstad kommun	S
1183	2020	11	23	3	Mus eller råtta	13	Hallands län	1380	Halmstad kommun	S
1206	2020	11	23	3	Mus eller råtta	13	Hallands län	1380	Halmstad kommun	S
1237	2020	11	24	3	Mus eller råtta	13	Hallands län	1380	Halmstad kommun	S
1288	2020	11	25	3	Mus eller råtta	13	Hallands län	1380	Halmstad kommun	S
1306	2020	11	25	3	Mus eller råtta	13	Hallands län	1380	Halmstad kommun	S
1336	2020	11	26	3	Mus eller råtta	13	Hallands län	1380	Halmstad kommun	S
1348	2020	11	26	3	Mus eller råtta	13	Hallands län	1380	Halmstad kommun	S
1389	2020	11	27	3	Mus eller råtta	13	Hallands län	1380	Halmstad kommun	S
1520	2020	12	2	3	Mus eller råtta	13	Hallands län	1380	Halmstad kommun	S
1533	2020	12	3	3	Mus eller råtta	13	Hallands län	1380	Halmstad kommun	S
1553	2020	12	3	3	Mus eller råtta	13	Hallands län	1380	Halmstad kommun	S
1572	2020	12	4	3	Mus eller råtta	13	Hallands län	1380	Halmstad kommun	S
1582	2020	12	5	3	Mus eller råtta	13	Hallands län	1380	Halmstad kommun	S
1583	2020	12	5	3	Mus eller råtta	13	Hallands län	1380	Halmstad kommun	S
1590	2020	12	5	3	Mus eller råtta	13	Hallands län	1380	Halmstad kommun	S
1621	2020	12	6	3	Mus eller råtta	13	Hallands län	1380	Halmstad kommun	S
1667	2020	12	8	3	Mus eller råtta	13	Hallands län	1380	Halmstad kommun	S
1668	2020	12	8	3	Mus eller råtta	13	Hallands län	1380	Halmstad kommun	S
1674	2020	12	8	3	Mus eller råtta	13	Hallands län	1380	Halmstad kommun	S
1694	2020	12	9	3	Mus eller råtta	13	Hallands län	1380	Halmstad kommun	S
1777	2020	12	14	3	Mus eller råtta	13	Hallands län	1380	Halmstad kommun	S
1809	2020	12	16	3	Mus eller råtta	13	Hallands län	1380	Halmstad kommun	S
1828	2020	12	17	3	Mus eller råtta	13	Hallands län	1380	Halmstad kommun	S
1858	2020	12	18	3	Mus eller råtta	13	Hallands län	1380	Halmstad kommun	S
1932	2020	12	23	3	Mus eller råtta	13	Hallands län	1380	Halmstad kommun	S
1991	2021	1	1	3	Mus eller råtta	13	Hallands län	1380	Halmstad kommun	S
2008	2021	1	3	3	Mus eller råtta	13	Hallands län	1380	Halmstad kommun	S
2009	2021	1	3	3	Mus eller råtta	13	Hallands län	1380	Halmstad kommun	S
2153	2021	1	24	2	Lämmel eller sork	13	Hallands län	1380	Halmstad kommun	S
2154	2021	1	24	3	Mus eller råtta	13	Hallands län	1380	Halmstad kommun	S
2217	2021	1	29	3	Mus eller råtta	13	Hallands län	1380	Halmstad kommun	S
2256	2021	2	1	2	Lämmel eller sork	13	Hallands län	1380	Halmstad kommun	S
2263	2021	2	2	3	Mus eller råtta	13	Hallands län	1380	Halmstad kommun	S
2264	2021	2	2	2	Lämmel eller sork	13	Hallands län	1380	Halmstad kommun	S
2405	2021	2	19	3	Mus eller råtta	13	Hallands län	1380	Halmstad kommun	S
2412	2021	2	21	3	Mus eller råtta	13	Hallands län	1380	Halmstad kommun	S
2517	2021	3	13	2	Lämmel eller sork	13	Hallands län	1380	Halmstad kommun	S
2526	2021	3	14	2	Lämmel eller sork	13	Hallands län	1380	Halmstad kommun	S
2528	2021	3	15	2	Lämmel eller sork	13	Hallands län	1380	Halmstad kommun	S
2951	2021	11	5	3	Mus eller råtta	13	Hallands län	1380	Halmstad kommun	S
3059	2021	11	18	3	Mus eller råtta	13	Hallands län	1380	Halmstad kommun	S
3805	2023	1	6	3	Mus eller råtta	13	Hallands län	1380	Halmstad kommun	S
4322	2025	1	17	3	Mus eller råtta	13	Hallands län	1380	Halmstad kommun	S
4470	2025	1	31	3	Mus eller råtta	13	Hallands län	1380	Halmstad kommun	S
4562	2025	2	3	3	Mus eller råtta	13	Hallands län	1380	Halmstad kommun	S
4576	2025	2	4	4	Näbbmus	13	Hallands län	1380	Halmstad kommun	S
4700	2025	2	8	3	Mus eller råtta	13	Hallands län	1380	Halmstad kommun	S
5147	2025	2	16	3	Mus eller råtta	13	Hallands län	1380	Halmstad kommun	S
5361	2025	2	25	3	Mus eller råtta	13	Hallands län	1380	Halmstad kommun	S
5526	2025	3	8	1	Okänd	13	Hallands län	1380	Halmstad kommun	S
5628	2025	3	21	1	Okänd	13	Hallands län	1380	Halmstad kommun	S
5794	2025	4	9	3	Mus eller råtta	13	Hallands län	1380	Halmstad kommun	S
5795	2025	4	9	3	Mus eller råtta	13	Hallands län	1380	Halmstad kommun	S
820	2020	11	17	3	Mus eller råtta	1	Stockholms län	136	Haninge kommun	S
826	2020	11	17	3	Mus eller råtta	1	Stockholms län	136	Haninge kommun	S
829	2020	11	17	3	Mus eller råtta	1	Stockholms län	136	Haninge kommun	S
833	2020	11	17	3	Mus eller råtta	1	Stockholms län	136	Haninge kommun	S
838	2020	11	17	3	Mus eller råtta	1	Stockholms län	136	Haninge kommun	S
853	2020	11	17	3	Mus eller råtta	1	Stockholms län	136	Haninge kommun	S
856	2020	11	17	3	Mus eller råtta	1	Stockholms län	136	Haninge kommun	S
862	2020	11	17	3	Mus eller råtta	1	Stockholms län	136	Haninge kommun	S
2101	2021	1	16	4973	Skogssork	1	Stockholms län	136	Haninge kommun	S
2145	2021	1	23	4973	Skogssork	1	Stockholms län	136	Haninge kommun	S
2324	2021	2	9	4973	Skogssork	1	Stockholms län	136	Haninge kommun	S
2486	2021	3	6	4	Näbbmus	1	Stockholms län	136	Haninge kommun	S
2700	2021	9	11	13972	Husmus	1	Stockholms län	136	Haninge kommun	S
3855	2023	2	6	3	Mus eller råtta	1	Stockholms län	136	Haningen kommun	S
3856	2023	2	6	3	Mus eller råtta	1	Stockholms län	136	Haningen kommun	S
3991	2024	1	6	2	Lämmel eller sork	1	Stockholms län	136	Haningen kommun	S
4204	2024	12	13	13972	Husmus	1	Stockholms län	136	Haningen kommun	S
4258	2025	1	8	3	Mus eller råtta	1	Stockholms län	136	Haninge kommun	S
4516	2025	2	1	3	Mus eller råtta	1	Stockholms län	136	Haninge kommun	S
4710	2025	2	9	3	Mus eller råtta	1	Stockholms län	136	Haninge kommun	S
4793	2025	2	12	3	Mus eller råtta	1	Stockholms län	136	Haninge kommun	S
4888	2025	2	14	3	Mus eller råtta	1	Stockholms län	136	Haninge kommun	S
5033	2025	2	16	3	Mus eller råtta	1	Stockholms län	136	Haninge kommun	S
5056	2025	2	16	19353	Brunråtta	1	Stockholms län	136	Haninge kommun	S
5135	2025	2	16	19353	Brunråtta	1	Stockholms län	136	Haninge kommun	S
5168	2025	2	16	3	Mus eller råtta	1	Stockholms län	136	Haninge kommun	S
5511	2025	3	6	3	Mus eller råtta	1	Stockholms län	136	Haninge kommun	S
5541	2025	3	9	3	Mus eller råtta	1	Stockholms län	136	Haninge kommun	S
5543	2025	3	9	3	Mus eller råtta	1	Stockholms län	136	Haninge kommun	S
5544	2025	3	9	3	Mus eller råtta	1	Stockholms län	136	Haninge kommun	S
5550	2025	3	9	3	Mus eller råtta	1	Stockholms län	136	Haninge kommun	S
3677	2022	11	15	2	Lämmel eller sork	25	Norrbottens län	2583	Haparanda kommun	N
62	2020	10	14	3	Mus eller råtta	23	Jämtlands län	2361	Härjedalen kommun	N
63	2020	10	14	3	Mus eller råtta	23	Jämtlands län	2361	Härjedalen kommun	N
64	2020	10	14	3	Mus eller råtta	23	Jämtlands län	2361	Härjedalen kommun	N
2441	2021	2	26	3	Mus eller råtta	23	Jämtlands län	2361	Härjedalen kommun	N
330	2020	11	9	3	Mus eller råtta	22	Västernorrlands län	2280	Härnösand kommun	N
530	2020	11	12	3	Mus eller råtta	22	Västernorrlands län	2280	Härnösand kommun	N
844	2020	11	17	3	Mus eller råtta	22	Västernorrlands län	2280	Härnösand kommun	N
1264	2020	11	24	3	Mus eller råtta	22	Västernorrlands län	2280	Härnösand kommun	N
2080	2021	1	14	3	Mus eller råtta	22	Västernorrlands län	2280	Härnösand kommun	N
2227	2021	1	29	3	Mus eller råtta	22	Västernorrlands län	2280	Härnösand kommun	N
2261	2021	2	1	3	Mus eller råtta	22	Västernorrlands län	2280	Härnösand kommun	N
2557	2021	3	21	3	Mus eller råtta	22	Västernorrlands län	2280	Härnösand kommun	N
2619	2021	4	13	3	Mus eller råtta	22	Västernorrlands län	2280	Härnösand kommun	N
2793	2021	10	14	3	Mus eller råtta	22	Västernorrlands län	2280	Härnösand kommun	N
2891	2021	10	29	3	Mus eller råtta	22	Västernorrlands län	2280	Härnösand kommun	N
2992	2021	11	8	3	Mus eller råtta	22	Västernorrlands län	2280	Härnösand kommun	N
3089	2021	11	20	3	Mus eller råtta	22	Västernorrlands län	2280	Härnösand kommun	N
3138	2021	11	29	3	Mus eller råtta	22	Västernorrlands län	2280	Härnösand kommun	N
3147	2021	12	1	3	Mus eller råtta	22	Västernorrlands län	2280	Härnösand kommun	N
3162	2021	12	3	3	Mus eller råtta	22	Västernorrlands län	2280	Härnösand kommun	N
3247	2021	12	22	3	Mus eller råtta	22	Västernorrlands län	2280	Härnösand kommun	N
3700	2022	11	26	3	Mus eller råtta	22	Västernorrlands län	2280	Härnösand kommun	N
4958	2025	2	15	3	Mus eller råtta	22	Västernorrlands län	2280	Härnösand kommun	N
4982	2025	2	15	3	Mus eller råtta	22	Västernorrlands län	2280	Härnösand kommun	N
172	2020	11	1	3	Mus eller råtta	14	Västra Götalands län	1401	Härryda kommun	S
1622	2020	12	6	3	Mus eller råtta	14	Västra Götalands län	1401	Härryda kommun	S
2239	2021	1	30	3	Mus eller råtta	14	Västra Götalands län	1401	Härryda kommun	S
4249	2025	1	7	3	Mus eller råtta	14	Västra Götalands län	1401	Härryda kommun	S
5489	2025	3	4	3	Mus eller råtta	14	Västra Götalands län	1401	Härryda kommun	S
5506	2025	3	6	2	Lämmel eller sork	14	Västra Götalands län	1401	Härryda kommun	S
5518	2025	3	7	3	Mus eller råtta	14	Västra Götalands län	1401	Härryda kommun	S
5740	2025	4	19	3	Mus eller råtta	14	Västra Götalands län	1401	Härryda kommun	S
142	2020	10	26	3	Mus eller råtta	12	Skåne län	1293	Hässleholm kommun	S
319	2020	11	9	3	Mus eller råtta	12	Skåne län	1293	Hässleholm kommun	S
629	2020	11	14	3	Mus eller råtta	12	Skåne län	1293	Hässleholm kommun	S
967	2020	11	19	3	Mus eller råtta	12	Skåne län	1293	Hässleholm kommun	S
974	2020	11	19	3	Mus eller råtta	12	Skåne län	1293	Hässleholm kommun	S
1286	2020	11	25	3	Mus eller råtta	12	Skåne län	1293	Hässleholm kommun	S
2123	2021	1	20	3	Mus eller råtta	12	Skåne län	1293	Hässleholm kommun	S
2124	2021	1	20	3	Mus eller råtta	12	Skåne län	1293	Hässleholm kommun	S
2399	2021	2	17	3	Mus eller råtta	12	Skåne län	1293	Hässleholm kommun	S
2456	2021	2	28	3	Mus eller råtta	12	Skåne län	1293	Hässleholm kommun	S
2488	2021	3	6	3	Mus eller råtta	12	Skåne län	1293	Hässleholm kommun	S
3814	2023	1	8	3	Mus eller råtta	12	Skåne län	1293	Hässleholm kommun	S
3845	2023	1	28	1	Okänd	12	Skåne län	1293	Hässleholm kommun	S
3851	2023	2	4	3	Mus eller råtta	12	Skåne län	1293	Hässleholm kommun	S
3852	2023	2	4	3	Mus eller råtta	12	Skåne län	1293	Hässleholm kommun	S
3853	2023	2	4	3	Mus eller råtta	12	Skåne län	1293	Hässleholm kommun	S
4807	2025	2	13	3	Mus eller råtta	12	Skåne län	1293	Hässleholm kommun	S
92	2020	10	15	3	Mus eller råtta	3	Uppsala län	331	Heby kommun	S
118	2020	10	21	3	Mus eller råtta	3	Uppsala län	331	Heby kommun	S
626	2020	11	14	3	Mus eller råtta	19	Västmanlands län	1917	Heby kommun	S
1078	2020	11	21	3	Mus eller råtta	19	Västmanlands län	1917	Heby kommun	S
1089	2020	11	21	3	Mus eller råtta	19	Västmanlands län	1917	Heby kommun	S
1174	2020	11	23	3	Mus eller råtta	3	Uppsala län	331	Heby kommun	S
1228	2020	11	23	3	Mus eller råtta	19	Västmanlands län	1917	Heby kommun	S
1356	2020	11	26	3	Mus eller råtta	19	Västmanlands län	1917	Heby kommun	S
1659	2020	12	7	3	Mus eller råtta	19	Västmanlands län	1917	Heby kommun	S
1896	2020	12	19	3	Mus eller råtta	19	Västmanlands län	1917	Heby kommun	S
1956	2020	12	28	3	Mus eller råtta	3	Uppsala län	331	Heby kommun	S
1987	2020	12	31	3	Mus eller råtta	19	Västmanlands län	1917	Heby kommun	S
2065	2021	1	11	3	Mus eller råtta	19	Västmanlands län	1917	Heby kommun	S
2103	2021	1	16	3	Mus eller råtta	19	Västmanlands län	1917	Heby kommun	S
2111	2021	1	17	3	Mus eller råtta	19	Västmanlands län	1917	Heby kommun	S
2114	2021	1	17	3	Mus eller råtta	19	Västmanlands län	1917	Heby kommun	S
2115	2021	1	17	3	Mus eller råtta	19	Västmanlands län	1917	Heby kommun	S
2118	2021	1	18	3	Mus eller råtta	19	Västmanlands län	1917	Heby kommun	S
2125	2021	1	20	3	Mus eller råtta	19	Västmanlands län	1917	Heby kommun	S
2135	2021	1	22	3	Mus eller råtta	19	Västmanlands län	1917	Heby kommun	S
2136	2021	1	22	3	Mus eller råtta	19	Västmanlands län	1917	Heby kommun	S
2245	2021	1	31	3	Mus eller råtta	3	Uppsala län	331	Heby kommun	S
2252	2021	2	1	3	Mus eller råtta	3	Uppsala län	331	Heby kommun	S
2433	2021	2	26	13972	Husmus	19	Västmanlands län	1917	Heby kommun	S
2436	2021	2	26	13972	Husmus	19	Västmanlands län	1917	Heby kommun	S
3103	2021	11	22	3	Mus eller råtta	19	Västmanlands län	1917	Heby kommun	S
3119	2021	11	25	3	Mus eller råtta	19	Västmanlands län	1917	Heby kommun	S
3160	2021	12	3	3	Mus eller råtta	19	Västmanlands län	1917	Heby kommun	S
3336	2022	1	27	3	Mus eller råtta	19	Västmanlands län	1917	Heby kommun	S
3337	2022	1	27	3	Mus eller råtta	19	Västmanlands län	1917	Heby kommun	S
4407	2025	1	28	3	Mus eller råtta	3	Uppsala län	331	Heby kommun	S
4730	2025	2	10	3	Mus eller råtta	3	Uppsala län	331	Heby kommun	S
4766	2025	2	11	3	Mus eller råtta	3	Uppsala län	331	Heby kommun	S
4778	2025	2	12	3	Mus eller råtta	3	Uppsala län	331	Heby kommun	S
5067	2025	2	16	3	Mus eller råtta	3	Uppsala län	331	Heby kommun	S
5104	2025	2	16	3	Mus eller råtta	3	Uppsala län	331	Heby kommun	S
5170	2025	2	16	3	Mus eller råtta	3	Uppsala län	331	Heby kommun	S
5347	2025	2	24	3	Mus eller råtta	3	Uppsala län	331	Heby kommun	S
5462	2025	3	2	3	Mus eller råtta	3	Uppsala län	331	Heby kommun	S
1006	2020	11	20	3	Mus eller råtta	20	Dalarnas län	2083	Hedemora kommun	N
5327	2025	2	23	13972	Husmus	20	Dalarnas län	2083	Hedemora kommun	N
5619	2025	3	19	3	Mus eller råtta	20	Dalarnas län	2083	Hedemora kommun	N
132	2020	10	24	3	Mus eller råtta	12	Skåne län	1283	Helsingborg kommun	S
136	2020	10	25	3	Mus eller råtta	12	Skåne län	1283	Helsingborg kommun	S
138	2020	10	25	3	Mus eller råtta	12	Skåne län	1283	Helsingborg kommun	S
271	2020	11	7	3	Mus eller råtta	12	Skåne län	1283	Helsingborg kommun	S
647	2020	11	14	3	Mus eller råtta	12	Skåne län	1283	Helsingborg kommun	S
1414	2020	11	28	3	Mus eller råtta	12	Skåne län	1283	Helsingborg kommun	S
3811	2023	1	7	3	Mus eller råtta	12	Skåne län	1283	Helsingborg kommun	S
4151	2024	11	10	3	Mus eller råtta	12	Skåne län	1283	Helsingborg kommun	S
5010	2025	2	16	3	Mus eller råtta	12	Skåne län	1283	Helsingborg kommun	S
5108	2025	2	16	1	Okänd	12	Skåne län	1283	Helsingborg kommun	S
5320	2025	2	22	3	Mus eller råtta	12	Skåne län	1283	Helsingborg kommun	S
557	2020	11	13	3	Mus eller råtta	14	Västra Götalands län	1466	Herrljunga kommun	S
590	2020	11	13	3	Mus eller råtta	14	Västra Götalands län	1466	Herrljunga kommun	S
1186	2020	11	23	3	Mus eller råtta	14	Västra Götalands län	1466	Herrljunga kommun	S
1992	2021	1	1	3	Mus eller råtta	14	Västra Götalands län	1466	Herrljunga kommun	S
2011	2021	1	3	3	Mus eller råtta	14	Västra Götalands län	1466	Herrljunga kommun	S
2214	2021	1	28	3	Mus eller råtta	14	Västra Götalands län	1466	Herrljunga kommun	S
2346	2021	2	12	3	Mus eller råtta	14	Västra Götalands län	1466	Herrljunga kommun	S
4307	2025	1	16	19353	Brunråtta	14	Västra Götalands län	1466	Herrljunga kommun	S
4754	2025	2	11	1	Okänd	14	Västra Götalands län	1466	Herrljunga kommun	S
5239	2025	2	18	3	Mus eller råtta	14	Västra Götalands län	1466	Herrljunga kommun	S
5338	2025	2	23	1	Okänd	14	Västra Götalands län	1466	Herrljunga kommun	S
207	2020	11	4	3	Mus eller råtta	14	Västra Götalands län	1497	Hjo kommun	S
429	2020	11	11	3	Mus eller råtta	14	Västra Götalands län	1497	Hjo kommun	S
430	2020	11	11	3	Mus eller råtta	14	Västra Götalands län	1497	Hjo kommun	S
454	2020	11	11	3	Mus eller råtta	14	Västra Götalands län	1497	Hjo kommun	S
535	2020	11	12	3	Mus eller råtta	14	Västra Götalands län	1497	Hjo kommun	S
951	2020	11	19	3	Mus eller råtta	14	Västra Götalands län	1497	Hjo kommun	S
1447	2020	11	29	3	Mus eller råtta	14	Västra Götalands län	1497	Hjo kommun	S
1449	2020	11	29	3	Mus eller råtta	14	Västra Götalands län	1497	Hjo kommun	S
1450	2020	11	29	3	Mus eller råtta	14	Västra Götalands län	1497	Hjo kommun	S
4960	2025	2	15	3	Mus eller råtta	14	Västra Götalands län	1497	Hjo kommun	S
5394	2025	2	26	3	Mus eller råtta	14	Västra Götalands län	1497	Hjo kommun	S
1008	2020	11	20	3	Mus eller råtta	12	Skåne län	1284	Höganäs kommun	S
1797	2020	12	15	3	Mus eller råtta	12	Skåne län	1284	Höganäs kommun	S
1812	2020	12	16	3	Mus eller råtta	12	Skåne län	1284	Höganäs kommun	S
2303	2021	2	7	3	Mus eller råtta	12	Skåne län	1284	Höganäs kommun	S
3121	2021	11	26	3	Mus eller råtta	12	Skåne län	1284	Höganäs kommun	S
4868	2025	2	14	3	Mus eller råtta	12	Skåne län	1284	Höganäs kommun	S
1560	2020	12	4	1	Okänd	8	Kalmar län	821	Högsby kommun	S
5184	2025	2	17	3	Mus eller råtta	8	Kalmar län	821	Högsby kommun	S
5270	2025	2	20	3	Mus eller råtta	8	Kalmar län	821	Högsby kommun	S
792	2020	11	16	3	Mus eller råtta	12	Skåne län	1267	Höör kommun	S
857	2020	11	17	2	Lämmel eller sork	12	Skåne län	1267	Höör kommun	S
2624	2021	4	17	3	Mus eller råtta	12	Skåne län	1267	Höör kommun	S
3886	2023	6	28	3	Mus eller råtta	12	Skåne län	1267	Höör kommun	S
4988	2025	2	16	3	Mus eller råtta	12	Skåne län	1267	Höör kommun	S
5060	2025	2	16	3	Mus eller råtta	12	Skåne län	1267	Höör kommun	S
5100	2025	2	16	19353	Brunråtta	12	Skåne län	1267	Höör kommun	S
5256	2025	2	19	3	Mus eller råtta	12	Skåne län	1267	Höör kommun	S
5345	2025	2	24	3	Mus eller råtta	12	Skåne län	1267	Höör kommun	S
5442	2025	3	1	3	Mus eller råtta	12	Skåne län	1267	Höör kommun	S
5569	2025	3	11	3	Mus eller råtta	12	Skåne län	1267	Höör kommun	S
692	2020	11	15	4	Näbbmus	12	Skåne län	1266	Hörby kommun	S
1107	2020	11	22	3	Mus eller råtta	12	Skåne län	1266	Hörby kommun	S
1179	2020	11	23	3	Mus eller råtta	12	Skåne län	1266	Hörby kommun	S
1234	2020	11	24	3	Mus eller råtta	12	Skåne län	1266	Hörby kommun	S
1334	2020	11	26	3	Mus eller råtta	12	Skåne län	1266	Hörby kommun	S
2255	2021	2	1	3	Mus eller råtta	12	Skåne län	1266	Hörby kommun	S
2442	2021	2	27	1	Okänd	12	Skåne län	1266	Hörby kommun	S
4355	2025	1	23	3	Mus eller råtta	12	Skåne län	1266	Hörby kommun	S
5566	2025	3	10	3	Mus eller råtta	12	Skåne län	1266	Hörby kommun	S
5581	2025	3	13	2	Lämmel eller sork	12	Skåne län	1266	Hörby kommun	S
5609	2025	3	17	3	Mus eller råtta	12	Skåne län	1266	Hörby kommun	S
5632	2025	3	21	3	Mus eller råtta	12	Skåne län	1266	Hörby kommun	S
5671	2025	3	30	3	Mus eller råtta	12	Skåne län	1266	Hörby kommun	S
5678	2025	4	30	3	Mus eller råtta	12	Skåne län	1266	Hörby kommun	S
5679	2025	4	30	3	Mus eller råtta	12	Skåne län	1266	Hörby kommun	S
5680	2025	4	30	3	Mus eller råtta	12	Skåne län	1266	Hörby kommun	S
5681	2025	4	30	3	Mus eller råtta	12	Skåne län	1266	Hörby kommun	S
5682	2025	4	27	3	Mus eller råtta	12	Skåne län	1266	Hörby kommun	S
5683	2025	4	27	3	Mus eller råtta	12	Skåne län	1266	Hörby kommun	S
5684	2025	4	25	3	Mus eller råtta	12	Skåne län	1266	Hörby kommun	S
5685	2025	4	25	3	Mus eller råtta	12	Skåne län	1266	Hörby kommun	S
5686	2025	4	22	3	Mus eller råtta	12	Skåne län	1266	Hörby kommun	S
2106	2021	1	16	3	Mus eller råtta	1	Stockholms län	126	Huddinge kommun	S
4491	2025	2	1	3	Mus eller råtta	1	Stockholms län	126	Huddinge kommun	S
4560	2025	2	3	3	Mus eller råtta	1	Stockholms län	126	Huddinge kommun	S
4872	2025	2	14	3	Mus eller råtta	1	Stockholms län	126	Huddinge kommun	S
4919	2025	2	15	1	Okänd	1	Stockholms län	126	Huddinge kommun	S
104	2020	10	17	3	Mus eller råtta	21	Gävleborgs län	2184	Hudiksvall kommun	N
105	2020	10	17	3	Mus eller råtta	21	Gävleborgs län	2184	Hudiksvall kommun	N
261	2020	11	7	3	Mus eller råtta	21	Gävleborgs län	2184	Hudiksvall kommun	N
262	2020	11	7	3	Mus eller råtta	21	Gävleborgs län	2184	Hudiksvall kommun	N
292	2020	11	8	0	Okänd	21	Gävleborgs län	2184	Hudiksvall kommun	N
293	2020	11	8	0	Okänd	21	Gävleborgs län	2184	Hudiksvall kommun	N
377	2020	11	10	3	Mus eller råtta	21	Gävleborgs län	2184	Hudiksvall kommun	N
378	2020	11	10	3	Mus eller råtta	21	Gävleborgs län	2184	Hudiksvall kommun	N
436	2020	11	11	3	Mus eller råtta	21	Gävleborgs län	2184	Hudiksvall kommun	N
437	2020	11	11	3	Mus eller råtta	21	Gävleborgs län	2184	Hudiksvall kommun	N
438	2020	11	11	3	Mus eller råtta	21	Gävleborgs län	2184	Hudiksvall kommun	N
439	2020	11	11	3	Mus eller råtta	21	Gävleborgs län	2184	Hudiksvall kommun	N
725	2020	11	15	3	Mus eller råtta	21	Gävleborgs län	2184	Hudiksvall kommun	N
794	2020	11	16	3	Mus eller råtta	21	Gävleborgs län	2184	Hudiksvall kommun	N
1247	2020	11	24	3	Mus eller råtta	21	Gävleborgs län	2184	Hudiksvall kommun	N
1248	2020	11	24	3	Mus eller råtta	21	Gävleborgs län	2184	Hudiksvall kommun	N
1378	2020	11	27	3	Mus eller råtta	21	Gävleborgs län	2184	Hudiksvall kommun	N
1379	2020	11	27	3	Mus eller råtta	21	Gävleborgs län	2184	Hudiksvall kommun	N
1405	2020	11	28	3	Mus eller råtta	21	Gävleborgs län	2184	Hudiksvall kommun	N
1406	2020	11	28	3	Mus eller råtta	21	Gävleborgs län	2184	Hudiksvall kommun	N
2130	2021	1	21	3	Mus eller råtta	21	Gävleborgs län	2184	Hudiksvall kommun	N
2150	2021	1	23	4	Näbbmus	21	Gävleborgs län	2184	Hudiksvall kommun	N
2347	2021	2	12	3	Mus eller råtta	21	Gävleborgs län	2184	Hudiksvall kommun	N
2595	2021	4	2	3	Mus eller råtta	21	Gävleborgs län	2184	Hudiksvall kommun	N
4387	2025	1	26	3	Mus eller råtta	21	Gävleborgs län	2184	Hudiksvall kommun	N
4553	2025	2	3	1	Okänd	21	Gävleborgs län	2184	Hudiksvall kommun	N
4555	2025	2	3	3	Mus eller råtta	21	Gävleborgs län	2184	Hudiksvall kommun	N
4636	2025	2	6	3	Mus eller råtta	21	Gävleborgs län	2184	Hudiksvall kommun	N
307	2020	11	8	3	Mus eller råtta	8	Kalmar län	860	Hultsfred kommun	S
4277	2025	1	12	3	Mus eller råtta	8	Kalmar län	860	Hultsfred kommun	S
4450	2025	1	30	3	Mus eller råtta	8	Kalmar län	860	Hultsfred kommun	S
5065	2025	2	16	3	Mus eller råtta	8	Kalmar län	860	Hultsfred kommun	S
5095	2025	2	16	3	Mus eller råtta	8	Kalmar län	860	Hultsfred kommun	S
5109	2025	2	16	3	Mus eller råtta	8	Kalmar län	860	Hultsfred kommun	S
5193	2025	2	17	3	Mus eller råtta	8	Kalmar län	860	Hultsfred kommun	S
5268	2025	2	20	3	Mus eller råtta	8	Kalmar län	860	Hultsfred kommun	S
147	2020	10	27	1892	Större skogsmus	13	Hallands län	1315	Hylte kommun	S
574	2020	11	13	1892	Större skogsmus	13	Hallands län	1315	Hylte kommun	S
1021	2020	11	20	1892	Större skogsmus	13	Hallands län	1315	Hylte kommun	S
1027	2020	11	20	3	Mus eller råtta	13	Hallands län	1315	Hylte kommun	S
1287	2020	11	25	3	Mus eller råtta	13	Hallands län	1315	Hylte kommun	S
1335	2020	11	26	3	Mus eller råtta	13	Hallands län	1315	Hylte kommun	S
4073	2024	8	3	3	Mus eller råtta	13	Hallands län	1315	Hylte kommun	S
4074	2024	8	3	3	Mus eller råtta	13	Hallands län	1315	Hylte kommun	S
4075	2024	8	4	3	Mus eller råtta	13	Hallands län	1315	Hylte kommun	S
4077	2024	8	5	3	Mus eller råtta	13	Hallands län	1315	Hylte kommun	S
4902	2025	2	15	3	Mus eller råtta	13	Hallands län	1315	Hylte kommun	S
5160	2025	2	16	3	Mus eller råtta	13	Hallands län	1315	Hylte kommun	S
5222	2025	2	18	3	Mus eller råtta	13	Hallands län	1315	Hylte kommun	S
4564	2025	2	3	3	Mus eller råtta	1	Stockholms län	123	Järfälla kommun	S
331	2020	11	9	3	Mus eller råtta	25	Norrbottens län	2510	Jokkmokk kommun	N
1253	2020	11	24	4973	Skogssork	25	Norrbottens län	2510	Jokkmokk kommun	N
226	2020	11	6	1892	Större skogsmus	6	Jönköpings län	680	Jönköping kommun	S
227	2020	11	6	1892	Större skogsmus	6	Jönköpings län	680	Jönköping kommun	S
396	2020	11	10	3	Mus eller råtta	6	Jönköpings län	680	Jönköping kommun	S
400	2020	11	10	3	Mus eller råtta	6	Jönköpings län	680	Jönköping kommun	S
401	2020	11	10	3	Mus eller råtta	6	Jönköpings län	680	Jönköping kommun	S
417	2020	11	10	3	Mus eller råtta	6	Jönköpings län	680	Jönköping kommun	S
452	2020	11	11	3	Mus eller råtta	6	Jönköpings län	680	Jönköping kommun	S
459	2020	11	11	3	Mus eller råtta	6	Jönköpings län	680	Jönköping kommun	S
467	2020	11	11	3	Mus eller råtta	6	Jönköpings län	680	Jönköping kommun	S
512	2020	11	12	3	Mus eller råtta	6	Jönköpings län	680	Jönköping kommun	S
554	2020	11	13	13972	Husmus	6	Jönköpings län	680	Jönköping kommun	S
555	2020	11	13	13972	Husmus	6	Jönköpings län	680	Jönköping kommun	S
566	2020	11	13	3	Mus eller råtta	6	Jönköpings län	680	Jönköping kommun	S
645	2020	11	14	3	Mus eller råtta	6	Jönköpings län	680	Jönköping kommun	S
690	2020	11	15	3	Mus eller råtta	6	Jönköpings län	680	Jönköping kommun	S
1103	2020	11	22	3	Mus eller råtta	6	Jönköpings län	680	Jönköping kommun	S
1104	2020	11	22	3	Mus eller råtta	6	Jönköpings län	680	Jönköping kommun	S
1281	2020	11	25	3	Mus eller råtta	6	Jönköpings län	680	Jönköping kommun	S
1282	2020	11	25	3	Mus eller råtta	6	Jönköpings län	680	Jönköping kommun	S
1453	2020	11	30	1	Okänd	6	Jönköpings län	680	Jönköping kommun	S
1454	2020	11	30	1	Okänd	6	Jönköpings län	680	Jönköping kommun	S
2148	2021	1	23	3	Mus eller råtta	6	Jönköpings län	680	Jönköping kommun	S
3070	2021	11	19	3	Mus eller råtta	6	Jönköpings län	680	Jönköping kommun	S
3071	2021	11	19	3	Mus eller råtta	6	Jönköpings län	680	Jönköping kommun	S
3079	2021	11	20	3	Mus eller råtta	6	Jönköpings län	680	Jönköping kommun	S
3084	2021	11	20	3	Mus eller råtta	6	Jönköpings län	680	Jönköping kommun	S
3086	2021	11	20	3	Mus eller råtta	6	Jönköpings län	680	Jönköping kommun	S
3087	2021	11	20	3	Mus eller råtta	6	Jönköpings län	680	Jönköping kommun	S
3111	2021	11	24	3	Mus eller råtta	6	Jönköpings län	680	Jönköping kommun	S
3114	2021	11	24	3	Mus eller råtta	6	Jönköpings län	680	Jönköping kommun	S
3115	2021	11	24	3	Mus eller råtta	6	Jönköpings län	680	Jönköping kommun	S
3128	2021	11	26	3	Mus eller råtta	6	Jönköpings län	680	Jönköping kommun	S
3180	2021	12	8	3	Mus eller råtta	6	Jönköpings län	680	Jönköping kommun	S
3212	2021	12	12	3	Mus eller råtta	6	Jönköpings län	680	Jönköping kommun	S
3713	2022	12	1	3	Mus eller råtta	6	Jönköpings län	680	Jönköping kommun	S
3922	2023	11	1	3	Mus eller råtta	6	Jönköpings län	680	Jönköping kommun	S
3950	2023	11	20	3	Mus eller råtta	6	Jönköpings län	680	Jönköping kommun	S
3953	2023	11	21	3	Mus eller råtta	6	Jönköpings län	680	Jönköping kommun	S
3955	2023	11	22	3	Mus eller råtta	6	Jönköpings län	680	Jönköping kommun	S
3956	2023	11	22	3	Mus eller råtta	6	Jönköpings län	680	Jönköping kommun	S
3957	2023	11	22	3	Mus eller råtta	6	Jönköpings län	680	Jönköping kommun	S
3959	2023	11	24	3	Mus eller råtta	6	Jönköpings län	680	Jönköping kommun	S
4294	2025	1	15	3	Mus eller råtta	6	Jönköpings län	680	Jönköping kommun	S
4394	2025	1	26	3	Mus eller råtta	6	Jönköpings län	680	Jönköping kommun	S
4505	2025	2	1	4	Näbbmus	6	Jönköpings län	680	Jönköping kommun	S
4578	2025	2	4	3	Mus eller råtta	6	Jönköpings län	680	Jönköping kommun	S
4620	2025	2	5	3	Mus eller råtta	6	Jönköpings län	680	Jönköping kommun	S
4751	2025	2	10	3	Mus eller råtta	6	Jönköpings län	680	Jönköping kommun	S
4852	2025	2	14	3	Mus eller råtta	6	Jönköpings län	680	Jönköping kommun	S
4906	2025	2	15	4	Näbbmus	6	Jönköpings län	680	Jönköping kommun	S
4946	2025	2	15	3	Mus eller råtta	6	Jönköpings län	680	Jönköping kommun	S
5105	2025	2	16	3	Mus eller råtta	6	Jönköpings län	680	Jönköping kommun	S
5163	2025	2	16	3	Mus eller råtta	6	Jönköpings län	680	Jönköping kommun	S
5173	2025	2	17	3	Mus eller råtta	6	Jönköpings län	680	Jönköping kommun	S
5188	2025	2	17	3	Mus eller råtta	6	Jönköpings län	680	Jönköping kommun	S
5209	2025	2	18	3	Mus eller råtta	6	Jönköpings län	680	Jönköping kommun	S
5214	2025	2	18	3	Mus eller råtta	6	Jönköpings län	680	Jönköping kommun	S
5299	2025	2	21	3	Mus eller råtta	6	Jönköpings län	680	Jönköping kommun	S
5336	2025	2	23	3	Mus eller råtta	6	Jönköpings län	680	Jönköping kommun	S
5380	2025	2	25	1	Okänd	6	Jönköpings län	680	Jönköping kommun	S
5420	2025	2	28	3	Mus eller råtta	6	Jönköpings län	680	Jönköping kommun	S
5426	2025	3	1	3	Mus eller råtta	6	Jönköpings län	680	Jönköping kommun	S
5436	2025	3	1	3	Mus eller råtta	6	Jönköpings län	680	Jönköping kommun	S
5578	2025	3	12	3	Mus eller råtta	6	Jönköpings län	680	Jönköping kommun	S
5763	2025	4	15	13972	Husmus	6	Jönköpings län	680	Jönköping kommun	S
5764	2025	4	15	13972	Husmus	6	Jönköpings län	680	Jönköping kommun	S
5765	2025	4	15	13972	Husmus	6	Jönköpings län	680	Jönköping kommun	S
5771	2025	4	14	1892	Större skogsmus	6	Jönköpings län	680	Jönköping kommun	S
5772	2025	4	14	1892	Större skogsmus	6	Jönköpings län	680	Jönköping kommun	S
5773	2025	4	14	1892	Större skogsmus	6	Jönköpings län	680	Jönköping kommun	S
4314	2025	1	16	3	Mus eller råtta	25	Norrbottens län	2514	Kalix kommun	N
659	2020	11	15	3	Mus eller råtta	8	Kalmar län	880	Kalmar kommun	S
660	2020	11	15	3	Mus eller råtta	8	Kalmar län	880	Kalmar kommun	S
661	2020	11	15	3	Mus eller råtta	8	Kalmar län	880	Kalmar kommun	S
662	2020	11	15	3	Mus eller råtta	8	Kalmar län	880	Kalmar kommun	S
663	2020	11	15	3	Mus eller råtta	8	Kalmar län	880	Kalmar kommun	S
664	2020	11	15	3	Mus eller råtta	8	Kalmar län	880	Kalmar kommun	S
665	2020	11	15	3	Mus eller råtta	8	Kalmar län	880	Kalmar kommun	S
666	2020	11	15	3	Mus eller råtta	8	Kalmar län	880	Kalmar kommun	S
667	2020	11	15	3	Mus eller råtta	8	Kalmar län	880	Kalmar kommun	S
668	2020	11	15	3	Mus eller råtta	8	Kalmar län	880	Kalmar kommun	S
669	2020	11	15	3	Mus eller råtta	8	Kalmar län	880	Kalmar kommun	S
670	2020	11	15	3	Mus eller råtta	8	Kalmar län	880	Kalmar kommun	S
671	2020	11	15	3	Mus eller råtta	8	Kalmar län	880	Kalmar kommun	S
672	2020	11	15	3	Mus eller råtta	8	Kalmar län	880	Kalmar kommun	S
1344	2020	11	26	4973	Skogssork	8	Kalmar län	880	Kalmar kommun	S
1629	2020	12	6	13426	Åkersork	8	Kalmar län	880	Kalmar kommun	S
3104	2021	11	22	3	Mus eller råtta	8	Kalmar län	880	Kalmar kommun	S
3107	2021	11	23	3	Mus eller råtta	8	Kalmar län	880	Kalmar kommun	S
3126	2021	11	26	3	Mus eller råtta	8	Kalmar län	880	Kalmar kommun	S
3132	2021	11	27	3	Mus eller råtta	8	Kalmar län	880	Kalmar kommun	S
3133	2021	11	27	3	Mus eller råtta	8	Kalmar län	880	Kalmar kommun	S
3136	2021	11	28	3	Mus eller råtta	8	Kalmar län	880	Kalmar kommun	S
3294	2022	1	10	3	Mus eller råtta	8	Kalmar län	880	Kalmar kommun	S
3896	2023	8	23	3	Mus eller råtta	8	Kalmar län	880	Kalmar kommun	S
4568	2025	2	3	3	Mus eller råtta	8	Kalmar län	880	Kalmar kommun	S
4594	2025	2	4	3	Mus eller råtta	8	Kalmar län	880	Kalmar kommun	S
4858	2025	2	14	3	Mus eller råtta	8	Kalmar län	880	Kalmar kommun	S
5620	2025	3	20	3	Mus eller råtta	8	Kalmar län	880	Kalmar kommun	S
5623	2025	3	20	3	Mus eller råtta	8	Kalmar län	880	Kalmar kommun	S
5624	2025	3	20	3	Mus eller råtta	8	Kalmar län	880	Kalmar kommun	S
5625	2025	3	20	3	Mus eller råtta	8	Kalmar län	880	Kalmar kommun	S
5626	2025	3	20	3	Mus eller råtta	8	Kalmar län	880	Kalmar kommun	S
5627	2025	3	20	3	Mus eller råtta	8	Kalmar län	880	Kalmar kommun	S
5810	2025	4	5	3	Mus eller råtta	9	Kalmar län	881	Kalmar kommun	S
167	2020	10	31	3	Mus eller råtta	14	Västra Götalands län	1446	Karlsborg kommun	S
241	2020	11	6	3	Mus eller råtta	14	Västra Götalands län	1446	Karlsborg kommun	S
1437	2020	11	29	3	Mus eller råtta	14	Västra Götalands län	1446	Karlsborg kommun	S
1448	2020	11	29	3	Mus eller råtta	14	Västra Götalands län	1446	Karlsborg kommun	S
1612	2020	12	5	3	Mus eller råtta	14	Västra Götalands län	1446	Karlsborg kommun	S
5719	2025	4	24	3	Mus eller råtta	14	Västra Götalands län	1446	Karlsborg kommun	S
5720	2025	4	24	3	Mus eller råtta	14	Västra Götalands län	1446	Karlsborg kommun	S
5721	2025	4	24	3	Mus eller råtta	14	Västra Götalands län	1446	Karlsborg kommun	S
5722	2025	4	24	3	Mus eller råtta	14	Västra Götalands län	1446	Karlsborg kommun	S
5723	2025	4	24	3	Mus eller råtta	14	Västra Götalands län	1446	Karlsborg kommun	S
5724	2025	4	24	3	Mus eller råtta	14	Västra Götalands län	1446	Karlsborg kommun	S
4319	2025	1	17	3	Mus eller råtta	10	Blekinge län	1082	Karlshamn kommun	S
4628	2025	2	5	3	Mus eller råtta	10	Blekinge län	1082	Karlshamn kommun	S
4655	2025	2	7	3	Mus eller råtta	10	Blekinge län	1082	Karlshamn kommun	S
194	2020	11	3	3	Mus eller råtta	18	Örebro län	1883	Karlskoga kommun	S
2377	2021	2	16	13972	Husmus	18	Örebro län	1883	Karlskoga kommun	S
115	2020	10	20	3	Mus eller råtta	10	Blekinge län	1080	Karlskrona kommun	S
157	2020	10	30	3	Mus eller råtta	10	Blekinge län	1080	Karlskrona kommun	S
199	2020	11	4	3	Mus eller råtta	10	Blekinge län	1080	Karlskrona kommun	S
985	2020	11	20	19353	Brunråtta	10	Blekinge län	1080	Karlskrona kommun	S
1178	2020	11	23	3	Mus eller råtta	10	Blekinge län	1080	Karlskrona kommun	S
1333	2020	11	26	3	Mus eller råtta	10	Blekinge län	1080	Karlskrona kommun	S
1515	2020	12	2	3	Mus eller råtta	10	Blekinge län	1080	Karlskrona kommun	S
4575	2025	2	4	3	Mus eller råtta	10	Blekinge län	1080	Karlskrona kommun	S
4661	2025	2	7	3	Mus eller råtta	10	Blekinge län	1080	Karlskrona kommun	S
4669	2025	2	7	13972	Husmus	10	Blekinge län	1080	Karlskrona kommun	S
4724	2025	2	9	3	Mus eller råtta	10	Blekinge län	1080	Karlskrona kommun	S
4913	2025	2	15	3	Mus eller råtta	10	Blekinge län	1080	Karlskrona kommun	S
4915	2025	2	15	3	Mus eller råtta	10	Blekinge län	1080	Karlskrona kommun	S
5074	2025	2	16	3	Mus eller råtta	10	Blekinge län	1080	Karlskrona kommun	S
5368	2025	2	25	3	Mus eller råtta	10	Blekinge län	1080	Karlskrona kommun	S
5466	2025	3	2	3	Mus eller råtta	10	Blekinge län	1080	Karlskrona kommun	S
5629	2025	3	21	3	Mus eller råtta	10	Blekinge län	1080	Karlskrona kommun	S
5687	2025	4	13	3	Mus eller råtta	10	Blekinge län	1080	Karlskrona kommun	S
110	2020	10	18	3	Mus eller råtta	17	Värmlands län	1780	Karlstad kommun	N
111	2020	10	18	3	Mus eller råtta	17	Värmlands län	1780	Karlstad kommun	N
139	2020	10	25	3	Mus eller råtta	17	Värmlands län	1780	Karlstad kommun	N
148	2020	10	27	3	Mus eller råtta	17	Värmlands län	1780	Karlstad kommun	N
150	2020	10	28	3	Mus eller råtta	17	Värmlands län	1780	Karlstad kommun	N
156	2020	10	29	2	Lämmel eller sork	17	Värmlands län	1780	Karlstad kommun	N
165	2020	10	31	3	Mus eller råtta	17	Värmlands län	1780	Karlstad kommun	N
168	2020	10	31	3	Mus eller råtta	17	Värmlands län	1780	Karlstad kommun	N
188	2020	11	2	3	Mus eller råtta	17	Värmlands län	1780	Karlstad kommun	N
200	2020	11	4	3	Mus eller råtta	17	Värmlands län	1780	Karlstad kommun	N
201	2020	11	4	3	Mus eller råtta	17	Värmlands län	1780	Karlstad kommun	N
280	2020	11	7	3	Mus eller råtta	17	Värmlands län	1780	Karlstad kommun	N
346	2020	11	9	3	Mus eller råtta	17	Värmlands län	1780	Karlstad kommun	N
398	2020	11	10	3	Mus eller råtta	17	Värmlands län	1780	Karlstad kommun	N
540	2020	11	12	4	Näbbmus	17	Värmlands län	1780	Karlstad kommun	N
601	2020	11	14	3	Mus eller råtta	17	Värmlands län	1780	Karlstad kommun	N
602	2020	11	14	3	Mus eller råtta	17	Värmlands län	1780	Karlstad kommun	N
615	2020	11	14	3	Mus eller råtta	17	Värmlands län	1780	Karlstad kommun	N
758	2020	11	16	3	Mus eller råtta	17	Värmlands län	1780	Karlstad kommun	N
759	2020	11	16	3	Mus eller råtta	17	Värmlands län	1780	Karlstad kommun	N
808	2020	11	17	3	Mus eller råtta	17	Värmlands län	1780	Karlstad kommun	N
809	2020	11	17	3	Mus eller råtta	17	Värmlands län	1780	Karlstad kommun	N
872	2020	11	18	3	Mus eller råtta	17	Värmlands län	1780	Karlstad kommun	N
873	2020	11	18	3	Mus eller råtta	17	Värmlands län	1780	Karlstad kommun	N
927	2020	11	19	3	Mus eller råtta	17	Värmlands län	1780	Karlstad kommun	N
928	2020	11	19	3	Mus eller råtta	17	Värmlands län	1780	Karlstad kommun	N
955	2020	11	19	3	Mus eller råtta	17	Värmlands län	1780	Karlstad kommun	N
998	2020	11	20	3	Mus eller råtta	17	Värmlands län	1780	Karlstad kommun	N
999	2020	11	20	3	Mus eller råtta	17	Värmlands län	1780	Karlstad kommun	N
1048	2020	11	21	3	Mus eller råtta	17	Värmlands län	1780	Karlstad kommun	N
1049	2020	11	21	3	Mus eller råtta	17	Värmlands län	1780	Karlstad kommun	N
1050	2020	11	21	3	Mus eller råtta	17	Värmlands län	1780	Karlstad kommun	N
1051	2020	11	21	3	Mus eller råtta	17	Värmlands län	1780	Karlstad kommun	N
1052	2020	11	21	3	Mus eller råtta	17	Värmlands län	1780	Karlstad kommun	N
1053	2020	11	21	3	Mus eller råtta	17	Värmlands län	1780	Karlstad kommun	N
1054	2020	11	21	3	Mus eller råtta	17	Värmlands län	1780	Karlstad kommun	N
1055	2020	11	21	3	Mus eller råtta	17	Värmlands län	1780	Karlstad kommun	N
1056	2020	11	21	3	Mus eller råtta	17	Värmlands län	1780	Karlstad kommun	N
1057	2020	11	21	3	Mus eller råtta	17	Värmlands län	1780	Karlstad kommun	N
1058	2020	11	21	3	Mus eller råtta	17	Värmlands län	1780	Karlstad kommun	N
1059	2020	11	21	3	Mus eller råtta	17	Värmlands län	1780	Karlstad kommun	N
1072	2020	11	21	3	Mus eller råtta	17	Värmlands län	1780	Karlstad kommun	N
1094	2020	11	21	3	Mus eller råtta	17	Värmlands län	1780	Karlstad kommun	N
1118	2020	11	22	3	Mus eller råtta	17	Värmlands län	1780	Karlstad kommun	N
1119	2020	11	22	3	Mus eller råtta	17	Värmlands län	1780	Karlstad kommun	N
1120	2020	11	22	3	Mus eller råtta	17	Värmlands län	1780	Karlstad kommun	N
1121	2020	11	22	3	Mus eller råtta	17	Värmlands län	1780	Karlstad kommun	N
1122	2020	11	22	3	Mus eller råtta	17	Värmlands län	1780	Karlstad kommun	N
1123	2020	11	22	3	Mus eller råtta	17	Värmlands län	1780	Karlstad kommun	N
1124	2020	11	22	3	Mus eller råtta	17	Värmlands län	1780	Karlstad kommun	N
1125	2020	11	22	3	Mus eller råtta	17	Värmlands län	1780	Karlstad kommun	N
1126	2020	11	22	3	Mus eller råtta	17	Värmlands län	1780	Karlstad kommun	N
1127	2020	11	22	3	Mus eller råtta	17	Värmlands län	1780	Karlstad kommun	N
1128	2020	11	22	3	Mus eller råtta	17	Värmlands län	1780	Karlstad kommun	N
1129	2020	11	22	3	Mus eller råtta	17	Värmlands län	1780	Karlstad kommun	N
1130	2020	11	22	3	Mus eller råtta	17	Värmlands län	1780	Karlstad kommun	N
1131	2020	11	22	3	Mus eller råtta	17	Värmlands län	1780	Karlstad kommun	N
1157	2020	11	22	3	Mus eller råtta	17	Värmlands län	1780	Karlstad kommun	N
1158	2020	11	22	3	Mus eller råtta	17	Värmlands län	1780	Karlstad kommun	N
1190	2020	11	23	3	Mus eller råtta	17	Värmlands län	1780	Karlstad kommun	N
1191	2020	11	23	3	Mus eller råtta	17	Värmlands län	1780	Karlstad kommun	N
1192	2020	11	23	3	Mus eller råtta	17	Värmlands län	1780	Karlstad kommun	N
1193	2020	11	23	3	Mus eller råtta	17	Värmlands län	1780	Karlstad kommun	N
1208	2020	11	23	3	Mus eller råtta	17	Värmlands län	1780	Karlstad kommun	N
1242	2020	11	24	3	Mus eller råtta	17	Värmlands län	1780	Karlstad kommun	N
1243	2020	11	24	3	Mus eller råtta	17	Värmlands län	1780	Karlstad kommun	N
1244	2020	11	24	3	Mus eller råtta	17	Värmlands län	1780	Karlstad kommun	N
1245	2020	11	24	3	Mus eller råtta	17	Värmlands län	1780	Karlstad kommun	N
1255	2020	11	24	3	Mus eller råtta	17	Värmlands län	1780	Karlstad kommun	N
1273	2020	11	24	3	Mus eller råtta	17	Värmlands län	1780	Karlstad kommun	N
1292	2020	11	25	3	Mus eller råtta	17	Värmlands län	1780	Karlstad kommun	N
1293	2020	11	25	3	Mus eller råtta	17	Värmlands län	1780	Karlstad kommun	N
1294	2020	11	25	3	Mus eller råtta	17	Värmlands län	1780	Karlstad kommun	N
1295	2020	11	25	3	Mus eller råtta	17	Värmlands län	1780	Karlstad kommun	N
1296	2020	11	25	3	Mus eller råtta	17	Värmlands län	1780	Karlstad kommun	N
1297	2020	11	25	3	Mus eller råtta	17	Värmlands län	1780	Karlstad kommun	N
1298	2020	11	25	3	Mus eller råtta	17	Värmlands län	1780	Karlstad kommun	N
1299	2020	11	25	3	Mus eller råtta	17	Värmlands län	1780	Karlstad kommun	N
1300	2020	11	25	3	Mus eller råtta	17	Värmlands län	1780	Karlstad kommun	N
1301	2020	11	25	3	Mus eller råtta	17	Värmlands län	1780	Karlstad kommun	N
1302	2020	11	25	3	Mus eller råtta	17	Värmlands län	1780	Karlstad kommun	N
1303	2020	11	25	3	Mus eller råtta	17	Värmlands län	1780	Karlstad kommun	N
1358	2020	11	26	3	Mus eller råtta	17	Värmlands län	1780	Karlstad kommun	N
1444	2020	11	29	3	Mus eller råtta	17	Värmlands län	1780	Karlstad kommun	N
1494	2020	12	1	3	Mus eller råtta	17	Värmlands län	1780	Karlstad kommun	N
1600	2020	12	5	3	Mus eller råtta	17	Värmlands län	1780	Karlstad kommun	N
1713	2020	12	10	3	Mus eller råtta	17	Värmlands län	1780	Karlstad kommun	N
1747	2020	12	11	3	Mus eller råtta	17	Värmlands län	1780	Karlstad kommun	N
1832	2020	12	17	3	Mus eller råtta	17	Värmlands län	1780	Karlstad kommun	N
1890	2020	12	19	3	Mus eller råtta	17	Värmlands län	1780	Karlstad kommun	N
1897	2020	12	19	3	Mus eller råtta	17	Värmlands län	1780	Karlstad kommun	N
1905	2020	12	20	3	Mus eller råtta	17	Värmlands län	1780	Karlstad kommun	N
1950	2020	12	27	3	Mus eller råtta	17	Värmlands län	1780	Karlstad kommun	N
3157	2021	12	2	3	Mus eller råtta	17	Värmlands län	1780	Karlstad kommun	N
3761	2022	12	12	3	Mus eller råtta	17	Värmlands län	1780	Karlstad kommun	N
4716	2025	2	9	3	Mus eller råtta	17	Värmlands län	1780	Karlstad kommun	N
4809	2025	2	13	3	Mus eller råtta	17	Värmlands län	1780	Karlstad kommun	N
4837	2025	2	14	3	Mus eller råtta	17	Värmlands län	1780	Karlstad kommun	N
5029	2025	2	16	3	Mus eller råtta	17	Värmlands län	1780	Karlstad kommun	N
5048	2025	2	16	3	Mus eller råtta	17	Värmlands län	1780	Karlstad kommun	N
5232	2025	2	18	3	Mus eller råtta	17	Värmlands län	1780	Karlstad kommun	N
5538	2025	3	9	3	Mus eller råtta	17	Värmlands län	1780	Karlstad kommun	N
5766	2025	4	15	3	Mus eller råtta	17	Värmlands län	1780	Karlstad kommun	N
225	2020	11	6	3	Mus eller råtta	4	Södermanlands län	483	Katrineholm kommun	S
886	2020	11	18	3	Mus eller råtta	4	Södermanlands län	483	Katrineholm kommun	S
900	2020	11	18	3	Mus eller råtta	4	Södermanlands län	483	Katrineholm kommun	S
911	2020	11	18	3	Mus eller råtta	4	Södermanlands län	483	Katrineholm kommun	S
1039	2020	11	21	3	Mus eller råtta	4	Södermanlands län	483	Katrineholm kommun	S
1280	2020	11	25	3	Mus eller råtta	4	Södermanlands län	483	Katrineholm kommun	S
1316	2020	11	25	3	Mus eller råtta	4	Södermanlands län	483	Katrineholm kommun	S
1683	2020	12	9	3	Mus eller råtta	4	Södermanlands län	483	Katrineholm kommun	S
1859	2020	12	18	3	Mus eller råtta	4	Södermanlands län	483	Katrineholm kommun	S
4715	2025	2	9	3	Mus eller råtta	4	Södermanlands län	483	Katrineholm kommun	S
4897	2025	2	14	3	Mus eller råtta	4	Södermanlands län	483	Katrineholm kommun	S
5599	2025	3	15	3	Mus eller råtta	4	Södermanlands län	483	Katrineholm kommun	S
308	2020	11	8	3	Mus eller råtta	12	Skåne län	1261	Kävlinge kommun	S
2342	2021	2	12	3	Mus eller råtta	12	Skåne län	1261	Kävlinge kommun	S
4405	2025	1	28	3	Mus eller råtta	12	Skåne län	1261	Kävlinge kommun	S
5408	2025	2	27	3	Mus eller råtta	12	Skåne län	1261	Kävlinge kommun	S
334	2020	11	9	3	Mus eller råtta	17	Värmlands län	1715	Kil kommun	N
402	2020	11	10	3	Mus eller råtta	17	Värmlands län	1715	Kil kommun	N
825	2020	11	17	3	Mus eller råtta	17	Värmlands län	1715	Kil kommun	N
871	2020	11	18	3	Mus eller råtta	17	Värmlands län	1715	Kil kommun	N
1073	2020	11	21	3	Mus eller råtta	17	Värmlands län	1715	Kil kommun	N
3181	2021	12	9	3	Mus eller råtta	17	Värmlands län	1715	Kil kommun	N
1944	2020	12	26	3	Mus eller råtta	5	Östergötlands län	513	Kinda kommun	S
4504	2025	2	1	3	Mus eller råtta	5	Östergötlands län	513	Kinda kommun	S
5133	2025	2	16	3	Mus eller råtta	5	Östergötlands län	513	Kinda kommun	S
5218	2025	2	18	3	Mus eller råtta	5	Östergötlands län	513	Kinda kommun	S
1202	2020	11	23	3	Mus eller råtta	25	Norrbottens län	2584	Kiruna kommun	N
2257	2021	2	1	3	Mus eller råtta	25	Norrbottens län	2584	Kiruna kommun	N
2258	2021	2	1	3	Mus eller råtta	25	Norrbottens län	2584	Kiruna kommun	N
2262	2021	2	1	3	Mus eller råtta	25	Norrbottens län	2584	Kiruna kommun	N
3788	2022	12	27	3	Mus eller råtta	25	Norrbottens län	2584	Kiruna kommun	N
3810	2023	1	7	3	Mus eller råtta	25	Norrbottens län	2584	Kiruna kommun	N
3868	2023	3	8	3	Mus eller råtta	25	Norrbottens län	2584	Kiruna kommun	N
4744	2025	2	10	3	Mus eller råtta	25	Norrbottens län	2584	Kiruna kommun	N
5205	2025	2	17	4	Näbbmus	25	Norrbottens län	2584	Kiruna kommun	N
644	2020	11	14	3	Mus eller råtta	12	Skåne län	1276	Klippan kommun	S
1412	2020	11	28	3	Mus eller råtta	12	Skåne län	1276	Klippan kommun	S
117	2020	10	21	3	Mus eller råtta	3	Uppsala län	330	Knivsta kommun	S
350	2020	11	10	3	Mus eller råtta	3	Uppsala län	330	Knivsta kommun	S
1099	2020	11	22	3	Mus eller råtta	3	Uppsala län	330	Knivsta kommun	S
1452	2020	11	30	3	Mus eller råtta	3	Uppsala län	330	Knivsta kommun	S
1555	2020	12	4	3	Mus eller råtta	3	Uppsala län	330	Knivsta kommun	S
1662	2020	12	8	3	Mus eller råtta	3	Uppsala län	330	Knivsta kommun	S
1983	2020	12	30	3	Mus eller råtta	3	Uppsala län	330	Knivsta kommun	S
2007	2021	1	3	3	Mus eller råtta	3	Uppsala län	330	Knivsta kommun	S
2141	2021	1	23	3	Mus eller råtta	3	Uppsala län	330	Knivsta kommun	S
2423	2021	2	25	3	Mus eller råtta	3	Uppsala län	330	Knivsta kommun	S
2432	2021	2	26	3	Mus eller råtta	3	Uppsala län	330	Knivsta kommun	S
2610	2021	4	9	3	Mus eller råtta	3	Uppsala län	330	Knivsta kommun	S
3288	2022	1	8	3	Mus eller råtta	3	Uppsala län	330	Knivsta kommun	S
3325	2022	1	23	3	Mus eller råtta	3	Uppsala län	330	Knivsta kommun	S
4110	2024	10	11	3	Mus eller råtta	3	Uppsala län	330	Knivsta kommun	S
4155	2024	11	11	3	Mus eller råtta	3	Uppsala län	330	Knivsta kommun	S
4282	2025	1	12	3	Mus eller råtta	3	Uppsala län	330	Knivsta kommun	S
4328	2025	1	19	3	Mus eller råtta	3	Uppsala län	330	Knivsta kommun	S
4600	2025	2	5	3	Mus eller råtta	3	Uppsala län	330	Knivsta kommun	S
5210	2025	2	18	3	Mus eller råtta	3	Uppsala län	330	Knivsta kommun	S
5260	2025	2	20	3	Mus eller råtta	3	Uppsala län	330	Knivsta kommun	S
5634	2025	3	22	3	Mus eller råtta	3	Uppsala län	330	Knivsta kommun	S
5640	2025	3	22	3	Mus eller råtta	3	Uppsala län	330	Knivsta kommun	S
763	2020	11	16	1892	Större skogsmus	19	Västmanlands län	1983	Köping kommun	S
1032	2020	11	20	3	Mus eller råtta	19	Västmanlands län	1983	Köping kommun	S
1340	2020	11	26	3	Mus eller råtta	19	Västmanlands län	1983	Köping kommun	S
2547	2021	3	19	3	Mus eller råtta	19	Västmanlands län	1983	Köping kommun	S
2560	2021	3	23	3	Mus eller råtta	19	Västmanlands län	1983	Köping kommun	S
3519	2022	8	1	3	Mus eller råtta	19	Västmanlands län	1983	Köping kommun	S
137	2020	10	25	3	Mus eller råtta	22	Västernorrlands län	2282	Kramfors kommun	N
166	2020	10	31	3	Mus eller råtta	22	Västernorrlands län	2282	Kramfors kommun	N
180	2020	11	1	3	Mus eller råtta	22	Västernorrlands län	2282	Kramfors kommun	N
216	2020	11	5	3	Mus eller råtta	22	Västernorrlands län	2282	Kramfors kommun	N
240	2020	11	6	3	Mus eller råtta	22	Västernorrlands län	2282	Kramfors kommun	N
270	2020	11	7	3	Mus eller råtta	22	Västernorrlands län	2282	Kramfors kommun	N
273	2020	11	7	3	Mus eller råtta	22	Västernorrlands län	2282	Kramfors kommun	N
275	2020	11	7	3	Mus eller råtta	22	Västernorrlands län	2282	Kramfors kommun	N
379	2020	11	10	3	Mus eller råtta	22	Västernorrlands län	2282	Kramfors kommun	N
380	2020	11	10	3	Mus eller råtta	22	Västernorrlands län	2282	Kramfors kommun	N
440	2020	11	11	1	Okänd	22	Västernorrlands län	2282	Kramfors kommun	N
441	2020	11	11	1	Okänd	22	Västernorrlands län	2282	Kramfors kommun	N
442	2020	11	11	1	Okänd	22	Västernorrlands län	2282	Kramfors kommun	N
443	2020	11	11	1	Okänd	22	Västernorrlands län	2282	Kramfors kommun	N
444	2020	11	11	1	Okänd	22	Västernorrlands län	2282	Kramfors kommun	N
445	2020	11	11	1	Okänd	22	Västernorrlands län	2282	Kramfors kommun	N
446	2020	11	11	1	Okänd	22	Västernorrlands län	2282	Kramfors kommun	N
447	2020	11	11	1	Okänd	22	Västernorrlands län	2282	Kramfors kommun	N
448	2020	11	11	1	Okänd	22	Västernorrlands län	2282	Kramfors kommun	N
449	2020	11	11	1	Okänd	22	Västernorrlands län	2282	Kramfors kommun	N
478	2020	11	11	3	Mus eller råtta	22	Västernorrlands län	2282	Kramfors kommun	N
510	2020	11	12	3	Mus eller råtta	22	Västernorrlands län	2282	Kramfors kommun	N
523	2020	11	12	3	Mus eller råtta	22	Västernorrlands län	2282	Kramfors kommun	N
536	2020	11	12	3	Mus eller råtta	22	Västernorrlands län	2282	Kramfors kommun	N
537	2020	11	12	3	Mus eller råtta	22	Västernorrlands län	2282	Kramfors kommun	N
543	2020	11	12	3	Mus eller råtta	22	Västernorrlands län	2282	Kramfors kommun	N
573	2020	11	13	3	Mus eller råtta	22	Västernorrlands län	2282	Kramfors kommun	N
907	2020	11	18	3	Mus eller råtta	22	Västernorrlands län	2282	Kramfors kommun	N
1262	2020	11	24	3	Mus eller råtta	22	Västernorrlands län	2282	Kramfors kommun	N
1485	2020	12	1	1	Okänd	22	Västernorrlands län	2282	Kramfors kommun	N
1486	2020	12	1	1	Okänd	22	Västernorrlands län	2282	Kramfors kommun	N
1501	2020	12	1	3	Mus eller råtta	22	Västernorrlands län	2282	Kramfors kommun	N
1912	2020	12	21	3	Mus eller råtta	22	Västernorrlands län	2282	Kramfors kommun	N
1922	2020	12	22	3	Mus eller råtta	22	Västernorrlands län	2282	Kramfors kommun	N
1924	2020	12	22	3	Mus eller råtta	22	Västernorrlands län	2282	Kramfors kommun	N
2408	2021	2	20	3	Mus eller råtta	22	Västernorrlands län	2282	Kramfors kommun	N
2688	2021	8	21	3	Mus eller råtta	22	Västernorrlands län	2282	Kramfors kommun	N
3143	2021	11	30	1	Okänd	22	Västernorrlands län	2282	Kramfors kommun	N
3148	2021	12	1	3	Mus eller råtta	22	Västernorrlands län	2282	Kramfors kommun	N
3153	2021	12	2	3	Mus eller råtta	22	Västernorrlands län	2282	Kramfors kommun	N
3194	2021	12	12	1	Okänd	22	Västernorrlands län	2282	Kramfors kommun	N
3195	2021	12	12	1	Okänd	22	Västernorrlands län	2282	Kramfors kommun	N
3196	2021	12	12	1	Okänd	22	Västernorrlands län	2282	Kramfors kommun	N
3197	2021	12	12	1	Okänd	22	Västernorrlands län	2282	Kramfors kommun	N
3198	2021	12	12	1	Okänd	22	Västernorrlands län	2282	Kramfors kommun	N
3199	2021	12	12	1	Okänd	22	Västernorrlands län	2282	Kramfors kommun	N
3200	2021	12	12	1	Okänd	22	Västernorrlands län	2282	Kramfors kommun	N
3201	2021	12	12	1	Okänd	22	Västernorrlands län	2282	Kramfors kommun	N
3202	2021	12	12	1	Okänd	22	Västernorrlands län	2282	Kramfors kommun	N
3203	2021	12	12	1	Okänd	22	Västernorrlands län	2282	Kramfors kommun	N
3204	2021	12	12	1	Okänd	22	Västernorrlands län	2282	Kramfors kommun	N
3205	2021	12	12	1	Okänd	22	Västernorrlands län	2282	Kramfors kommun	N
3206	2021	12	12	1	Okänd	22	Västernorrlands län	2282	Kramfors kommun	N
3207	2021	12	12	1	Okänd	22	Västernorrlands län	2282	Kramfors kommun	N
3208	2021	12	12	1	Okänd	22	Västernorrlands län	2282	Kramfors kommun	N
3209	2021	12	12	1	Okänd	22	Västernorrlands län	2282	Kramfors kommun	N
3216	2021	12	14	3	Mus eller råtta	22	Västernorrlands län	2282	Kramfors kommun	N
3243	2021	12	20	1	Okänd	22	Västernorrlands län	2282	Kramfors kommun	N
3315	2022	1	16	3	Mus eller råtta	22	Västernorrlands län	2282	Kramfors kommun	N
3335	2022	1	26	4973	Skogssork	22	Västernorrlands län	2282	Kramfors kommun	N
3344	2022	1	30	3	Mus eller råtta	22	Västernorrlands län	2282	Kramfors kommun	N
3411	2022	2	20	3	Mus eller råtta	22	Västernorrlands län	2282	Kramfors kommun	N
3431	2022	3	7	3	Mus eller råtta	22	Västernorrlands län	2282	Kramfors kommun	N
3437	2022	3	13	3	Mus eller råtta	22	Västernorrlands län	2282	Kramfors kommun	N
3451	2022	3	23	13972	Husmus	22	Västernorrlands län	2282	Kramfors kommun	N
3454	2022	3	25	4	Näbbmus	22	Västernorrlands län	2282	Kramfors kommun	N
3471	2022	4	3	4	Näbbmus	22	Västernorrlands län	2282	Kramfors kommun	N
3472	2022	4	7	1	Okänd	22	Västernorrlands län	2282	Kramfors kommun	N
3473	2022	4	9	3	Mus eller råtta	22	Västernorrlands län	2282	Kramfors kommun	N
3486	2022	4	23	3	Mus eller råtta	22	Västernorrlands län	2282	Kramfors kommun	N
3600	2022	10	17	3	Mus eller råtta	22	Västernorrlands län	2282	Kramfors kommun	N
3623	2022	10	28	3	Mus eller råtta	22	Västernorrlands län	2282	Kramfors kommun	N
3684	2022	11	19	3	Mus eller råtta	22	Västernorrlands län	2282	Kramfors kommun	N
3907	2023	10	22	3	Mus eller råtta	22	Västernorrlands län	2282	Kramfors kommun	N
3960	2023	11	25	3	Mus eller råtta	22	Västernorrlands län	2282	Kramfors kommun	N
4000	2024	1	14	3	Mus eller råtta	22	Västernorrlands län	2282	Kramfors kommun	N
4069	2024	7	13	3	Mus eller råtta	22	Västernorrlands län	2282	Kramfors kommun	N
4389	2025	1	26	2	Lämmel eller sork	22	Västernorrlands län	2282	Kramfors kommun	N
4678	2025	2	8	13972	Husmus	22	Västernorrlands län	2282	Kramfors kommun	N
5492	2025	3	4	2	Lämmel eller sork	22	Västernorrlands län	2282	Kramfors kommun	N
5568	2025	3	11	2	Lämmel eller sork	22	Västernorrlands län	2282	Kramfors kommun	N
5803	2025	4	6	2	Lämmel eller sork	22	Västernorrlands län	2282	Kramfors kommun	N
5816	2025	4	4	2	Lämmel eller sork	22	Västernorrlands län	2282	Kramfors kommun	N
674	2020	11	15	1	Okänd	12	Skåne län	1290	Kristianstad kommun	S
1581	2020	12	5	3	Mus eller råtta	12	Skåne län	1290	Kristianstad kommun	S
3712	2022	11	30	3	Mus eller råtta	12	Skåne län	1290	Kristianstad kommun	S
3783	2022	12	22	3	Mus eller råtta	12	Skåne län	1290	Kristianstad kommun	S
3798	2022	12	31	3	Mus eller råtta	12	Skåne län	1290	Kristianstad kommun	S
3803	2023	1	5	3	Mus eller råtta	12	Skåne län	1290	Kristianstad kommun	S
3807	2023	1	7	3	Mus eller råtta	12	Skåne län	1290	Kristianstad kommun	S
3808	2023	1	7	3	Mus eller råtta	12	Skåne län	1290	Kristianstad kommun	S
3817	2023	1	10	3	Mus eller råtta	12	Skåne län	1290	Kristianstad kommun	S
3821	2023	1	11	3	Mus eller råtta	12	Skåne län	1290	Kristianstad kommun	S
3837	2023	1	22	3	Mus eller råtta	12	Skåne län	1290	Kristianstad kommun	S
4250	2025	1	7	1892	Större skogsmus	12	Skåne län	1290	Kristianstad kommun	S
4343	2025	1	22	3	Mus eller råtta	12	Skåne län	1290	Kristianstad kommun	S
4495	2025	2	1	3	Mus eller råtta	12	Skåne län	1290	Kristianstad kommun	S
4525	2025	2	1	3	Mus eller råtta	12	Skåne län	1290	Kristianstad kommun	S
4876	2025	2	14	3	Mus eller råtta	12	Skåne län	1290	Kristianstad kommun	S
4930	2025	2	15	3	Mus eller råtta	12	Skåne län	1290	Kristianstad kommun	S
4932	2025	2	15	3	Mus eller råtta	12	Skåne län	1290	Kristianstad kommun	S
5009	2025	2	16	3	Mus eller råtta	12	Skåne län	1290	Kristianstad kommun	S
5580	2025	3	12	3	Mus eller råtta	12	Skåne län	1290	Kristianstad kommun	S
5670	2025	3	30	3	Mus eller råtta	12	Skåne län	1290	Kristianstad kommun	S
23	2020	9	21	3	Mus eller råtta	17	Värmlands län	1781	Kristinehamn kommun	N
186	2020	11	2	3	Mus eller råtta	17	Värmlands län	1781	Kristinehamn kommun	N
367	2020	11	10	3	Mus eller råtta	17	Värmlands län	1781	Kristinehamn kommun	N
580	2020	11	13	3	Mus eller råtta	17	Värmlands län	1781	Kristinehamn kommun	N
874	2020	11	18	3	Mus eller råtta	17	Värmlands län	1781	Kristinehamn kommun	N
1339	2020	11	26	3	Mus eller råtta	17	Värmlands län	1781	Kristinehamn kommun	N
1377	2020	11	27	3	Mus eller råtta	17	Värmlands län	1781	Kristinehamn kommun	N
4213	2024	12	23	3	Mus eller råtta	23	Jämtlands län	2309	Krokom kommun	N
4244	2025	1	6	3	Mus eller råtta	23	Jämtlands län	2309	Krokom kommun	N
4292	2025	1	15	3	Mus eller råtta	23	Jämtlands län	2309	Krokom kommun	N
4382	2025	1	26	3	Mus eller råtta	23	Jämtlands län	2309	Krokom kommun	N
4383	2025	1	26	3	Mus eller råtta	23	Jämtlands län	2309	Krokom kommun	N
4449	2025	1	30	13426	Åkersork	23	Jämtlands län	2309	Krokom kommun	N
4455	2025	1	30	4973	Skogssork	23	Jämtlands län	2309	Krokom kommun	N
4481	2025	2	1	3	Mus eller råtta	23	Jämtlands län	2309	Krokom kommun	N
4482	2025	2	1	3	Mus eller råtta	23	Jämtlands län	2309	Krokom kommun	N
4549	2025	2	2	4973	Skogssork	23	Jämtlands län	2309	Krokom kommun	N
4559	2025	2	3	2	Lämmel eller sork	23	Jämtlands län	2309	Krokom kommun	N
4674	2025	2	7	3	Mus eller råtta	23	Jämtlands län	2309	Krokom kommun	N
4690	2025	2	8	2	Lämmel eller sork	23	Jämtlands län	2309	Krokom kommun	N
4841	2025	2	14	2	Lämmel eller sork	23	Jämtlands län	2309	Krokom kommun	N
4943	2025	2	15	2	Lämmel eller sork	23	Jämtlands län	2309	Krokom kommun	N
5002	2025	2	16	2	Lämmel eller sork	23	Jämtlands län	2309	Krokom kommun	N
5126	2025	2	16	3	Mus eller råtta	23	Jämtlands län	2309	Krokom kommun	N
5186	2025	2	17	2	Lämmel eller sork	23	Jämtlands län	2309	Krokom kommun	N
5237	2025	2	18	2	Lämmel eller sork	23	Jämtlands län	2309	Krokom kommun	N
5249	2025	2	19	2	Lämmel eller sork	23	Jämtlands län	2309	Krokom kommun	N
5385	2025	2	25	2	Lämmel eller sork	23	Jämtlands län	2309	Krokom kommun	N
5400	2025	2	27	2	Lämmel eller sork	23	Jämtlands län	2309	Krokom kommun	N
5424	2025	2	28	2	Lämmel eller sork	23	Jämtlands län	2309	Krokom kommun	N
5425	2025	3	1	2	Lämmel eller sork	23	Jämtlands län	2309	Krokom kommun	N
5485	2025	3	4	2	Lämmel eller sork	23	Jämtlands län	2309	Krokom kommun	N
5508	2025	3	6	2	Lämmel eller sork	23	Jämtlands län	2309	Krokom kommun	N
5611	2025	3	17	2	Lämmel eller sork	23	Jämtlands län	2309	Krokom kommun	N
5646	2025	3	24	2	Lämmel eller sork	23	Jämtlands län	2309	Krokom kommun	N
5711	2025	4	26	1	Okänd	23	Jämtlands län	2309	Krokom kommun	N
4507	2025	2	1	3	Mus eller råtta	18	Örebro län	1881	Kumla kommun	S
416	2020	11	10	13972	Husmus	14	Västra Götalands län	1482	Kungälv kommun	S
1729	2020	12	11	3	Mus eller råtta	14	Västra Götalands län	1482	Kungälv kommun	S
1744	2020	12	11	3	Mus eller råtta	14	Västra Götalands län	1482	Kungälv kommun	S
1755	2020	12	12	3	Mus eller råtta	14	Västra Götalands län	1482	Kungälv kommun	S
3801	2023	1	3	3	Mus eller råtta	14	Västra Götalands län	1482	Kungälv kommun	S
4295	2025	1	15	3	Mus eller råtta	14	Västra Götalands län	1482	Kungälv kommun	S
4342	2025	1	22	3	Mus eller råtta	14	Västra Götalands län	1482	Kungälv kommun	S
4508	2025	2	1	3	Mus eller råtta	14	Västra Götalands län	1482	Kungälv kommun	S
4643	2025	2	6	3	Mus eller råtta	14	Västra Götalands län	1482	Kungälv kommun	S
4739	2025	2	10	3	Mus eller råtta	14	Västra Götalands län	1482	Kungälv kommun	S
4775	2025	2	11	3	Mus eller råtta	14	Västra Götalands län	1482	Kungälv kommun	S
596	2020	11	14	3	Mus eller råtta	13	Hallands län	1384	Kungsbacka kommun	S
1090	2020	11	21	3	Mus eller råtta	13	Hallands län	1384	Kungsbacka kommun	S
2265	2021	2	2	3	Mus eller råtta	13	Hallands län	1384	Kungsbacka kommun	S
4226	2025	1	2	3	Mus eller råtta	13	Hallands län	1384	Kungsbacka kommun	S
4248	2025	1	7	3	Mus eller råtta	13	Hallands län	1384	Kungsbacka kommun	S
4256	2025	1	8	3	Mus eller råtta	13	Hallands län	1384	Kungsbacka kommun	S
4268	2025	1	10	3	Mus eller råtta	13	Hallands län	1384	Kungsbacka kommun	S
4284	2025	1	14	3	Mus eller råtta	13	Hallands län	1384	Kungsbacka kommun	S
4285	2025	1	14	3	Mus eller råtta	13	Hallands län	1384	Kungsbacka kommun	S
4353	2025	1	23	3	Mus eller råtta	13	Hallands län	1384	Kungsbacka kommun	S
4385	2025	1	26	3	Mus eller råtta	13	Hallands län	1384	Kungsbacka kommun	S
4399	2025	1	27	3	Mus eller råtta	13	Hallands län	1384	Kungsbacka kommun	S
4436	2025	1	29	3	Mus eller råtta	13	Hallands län	1384	Kungsbacka kommun	S
4515	2025	2	1	3	Mus eller råtta	13	Hallands län	1384	Kungsbacka kommun	S
4535	2025	2	2	3	Mus eller råtta	13	Hallands län	1384	Kungsbacka kommun	S
4539	2025	2	2	3	Mus eller råtta	13	Hallands län	1384	Kungsbacka kommun	S
4658	2025	2	7	3	Mus eller råtta	13	Hallands län	1384	Kungsbacka kommun	S
4664	2025	2	7	3	Mus eller råtta	13	Hallands län	1384	Kungsbacka kommun	S
4708	2025	2	8	3	Mus eller råtta	13	Hallands län	1384	Kungsbacka kommun	S
4717	2025	2	9	3	Mus eller råtta	13	Hallands län	1384	Kungsbacka kommun	S
4749	2025	2	10	3	Mus eller råtta	13	Hallands län	1384	Kungsbacka kommun	S
4756	2025	2	11	3	Mus eller råtta	13	Hallands län	1384	Kungsbacka kommun	S
4757	2025	2	11	3	Mus eller råtta	13	Hallands län	1384	Kungsbacka kommun	S
4780	2025	2	12	3	Mus eller råtta	13	Hallands län	1384	Kungsbacka kommun	S
4818	2025	2	13	1904	Mindre skogsmus	13	Hallands län	1384	Kungsbacka kommun	S
4825	2025	2	13	13972	Husmus	13	Hallands län	1384	Kungsbacka kommun	S
4845	2025	2	14	3	Mus eller råtta	13	Hallands län	1384	Kungsbacka kommun	S
4847	2025	2	14	3	Mus eller råtta	13	Hallands län	1384	Kungsbacka kommun	S
4925	2025	2	15	4	Näbbmus	13	Hallands län	1384	Kungsbacka kommun	S
4967	2025	2	15	4	Näbbmus	13	Hallands län	1384	Kungsbacka kommun	S
5018	2025	2	16	3	Mus eller råtta	13	Hallands län	1384	Kungsbacka kommun	S
5258	2025	2	19	3	Mus eller råtta	13	Hallands län	1384	Kungsbacka kommun	S
5285	2025	2	21	3	Mus eller råtta	13	Hallands län	1384	Kungsbacka kommun	S
5363	2025	2	25	3	Mus eller råtta	13	Hallands län	1384	Kungsbacka kommun	S
5399	2025	2	26	3	Mus eller råtta	13	Hallands län	1384	Kungsbacka kommun	S
5433	2025	3	1	3	Mus eller råtta	13	Hallands län	1384	Kungsbacka kommun	S
5488	2025	3	4	3	Mus eller råtta	13	Hallands län	1384	Kungsbacka kommun	S
5512	2025	3	6	3	Mus eller råtta	13	Hallands län	1384	Kungsbacka kommun	S
5529	2025	3	8	3	Mus eller råtta	13	Hallands län	1384	Kungsbacka kommun	S
5615	2025	3	18	3	Mus eller råtta	13	Hallands län	1384	Kungsbacka kommun	S
5709	2025	4	26	3	Mus eller råtta	13	Hallands län	1384	Kungsbacka kommun	S
5710	2025	4	26	3	Mus eller råtta	13	Hallands län	1384	Kungsbacka kommun	S
5712	2025	4	26	3	Mus eller råtta	13	Hallands län	1384	Kungsbacka kommun	S
5713	2025	4	26	3	Mus eller råtta	13	Hallands län	1384	Kungsbacka kommun	S
5714	2025	4	25	3	Mus eller råtta	13	Hallands län	1384	Kungsbacka kommun	S
5715	2025	4	25	3	Mus eller råtta	13	Hallands län	1384	Kungsbacka kommun	S
5750	2025	4	17	3	Mus eller råtta	13	Hallands län	1384	Kungsbacka kommun	S
5751	2025	4	17	3	Mus eller råtta	13	Hallands län	1384	Kungsbacka kommun	S
5755	2025	4	15	3	Mus eller råtta	13	Hallands län	1384	Kungsbacka kommun	S
[truncated: 3,750 more rows]

## Sheet: Legend
Variable	Explanation
ID	ID of record
Year	Year
Month	Month
Day	Day
species	Species code
species_2	Taxon
LANSKOD	Code of county
LANSNAMN	Name of county
KOM_KOD	Code of municipality
MIN_KOMMUN	Namoe municipality
North_South	Record in northern Sweden (North) or southern Sweden (South)
